# Supplementary material
Source: PubMed Central journal article supplement (PMC6648058)
Supplement: ao9b00030_si_001.pdf [file ao9b00030_si_001.pdf]

## Supporting Information for

# Computational Study of the Ni-Catalyzed C–H Oxidative Cycloaddition of Aromatic Amides with Alkynes

Humair M. Omer<sup>†</sup> and Peng Liu<sup>†,‡,\*</sup>

Department of Chemistry, University of Pittsburgh, Pittsburgh, Pennsylvania 15260, USA

<sup>\*†</sup>Department of Chemical and Petroleum Engineering, University of Pittsburgh, Pittsburgh,  
Pennsylvania 15261, USA

## Table of Contents

|                                                                                                       |    |
|-------------------------------------------------------------------------------------------------------|----|
| 1) Amide N–H Oxidative Addition with Different Ligands on the Ni Catalyst .....                       | S3 |
| 2) Other Mechanisms of the Ni-Catalyzed <i>ortho</i> C( <i>sp</i> <sup>2</sup> )–H Metalation .....   | S4 |
| 3) C–N Reductive Elimination With A Model Substrate Containing 8-Aminoquinoline Directing Group ..... | S6 |
| 4) Cartesian Coordinates .....                                                                        | S7 |

## Amide N–H Oxidative Addition with Different Ligands on the Ni Catalyst

As discussed in the main text, the catalytic cycle begins with the coordination of the 2-pyridinylmethylamine directing group to the Ni center followed by the oxidative addition of the amide N–H bond. Under the experimental conditions of 10 mol% Ni(cod)<sub>2</sub>, 40 mol% PPh<sub>3</sub> ligand, and 3 or more equivalents of internal alkyne, either cod, PPh<sub>3</sub>, or the alkyne (2-butyne) can potentially bind to the Ni center and promote the amide N–H oxidative addition (**TS1**). These different mechanisms were considered computationally (Figure S1). Our calculations indicate that the most favorable amide N–H oxidative addition pathway involves binding of two PPh<sub>3</sub> ligand with an activation barrier of 28.0 kcal/mol with respect to **1** and Ni(cod)<sub>2</sub> to form the phosphine-bound Ni(II)-hydride complex **5**. The amide N–H oxidative addition with cod, one PPh<sub>3</sub>, and alkyne ligands have slightly higher barriers.

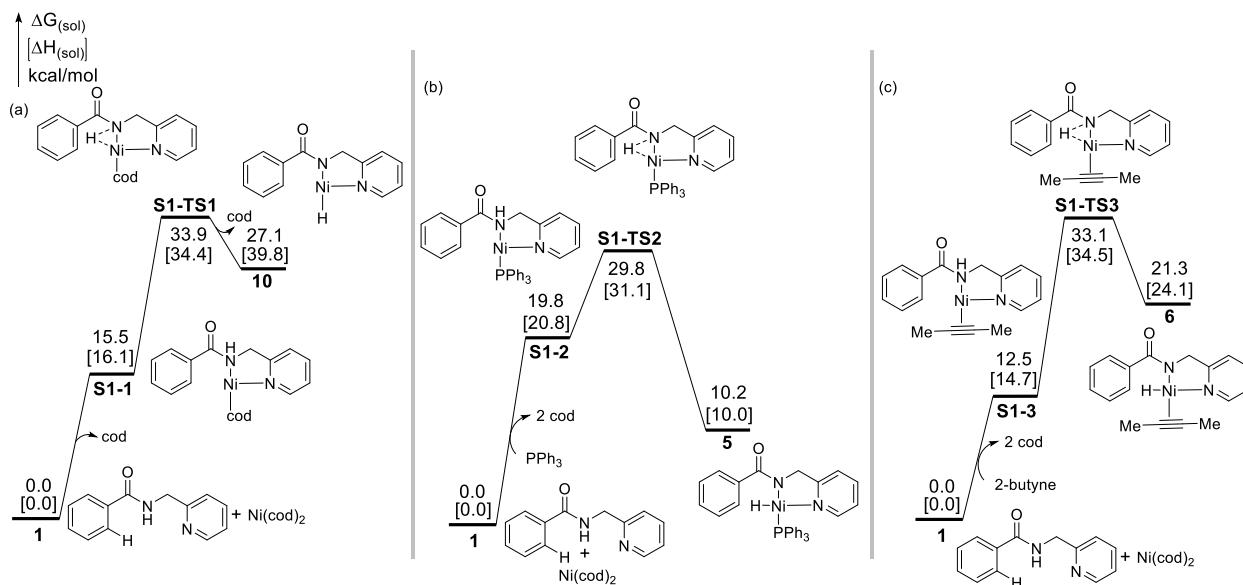

Figure S1. Reaction energy profiles of amide N–H oxidative addition of **1** and Ni(cod)<sub>2</sub> with (a) a cod ligand, (b) a PPh<sub>3</sub> ligand, and (c) an alkyne ligand.

## Other Mechanisms of the Ni-Catalyzed *ortho* C(*sp*<sup>2</sup>)-H Metalation

Several different mechanisms of the Ni-catalyzed *ortho* C(*sp*<sup>2</sup>)-H metalation of **1** were considered computationally. These alternative mechanisms include: (a)  $\sigma$ -bond metathesis with an alkyl-Ni(II) complex (Figure S2); (b)  $\sigma$ -bond metathesis with phosphine-bound Ni(II)-hydride (Figure S3); (c) C-H oxidative addition and subsequent N-H  $\sigma$ -bond metathesis (Figure S4); and (d) deprotonation by the amide N (Figure S5). These alternative mechanisms were ruled out because of the high activation barriers.

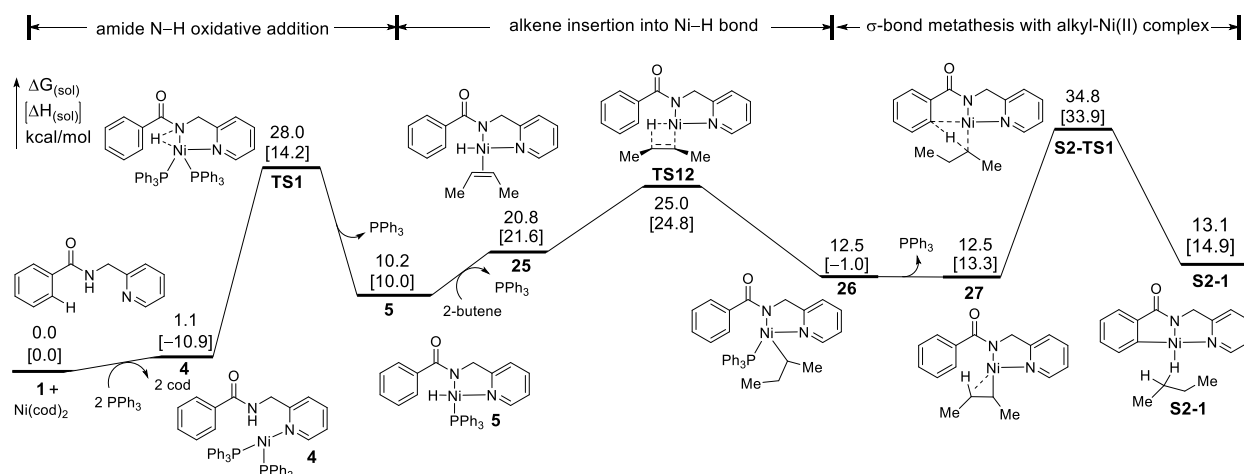

Figure S2. Reaction energy profile of Ni-catalyzed *ortho* C(*sp*<sup>2</sup>)-H metalation of amide **1** with *cis*-2-butene acting as the hydrogen acceptor.

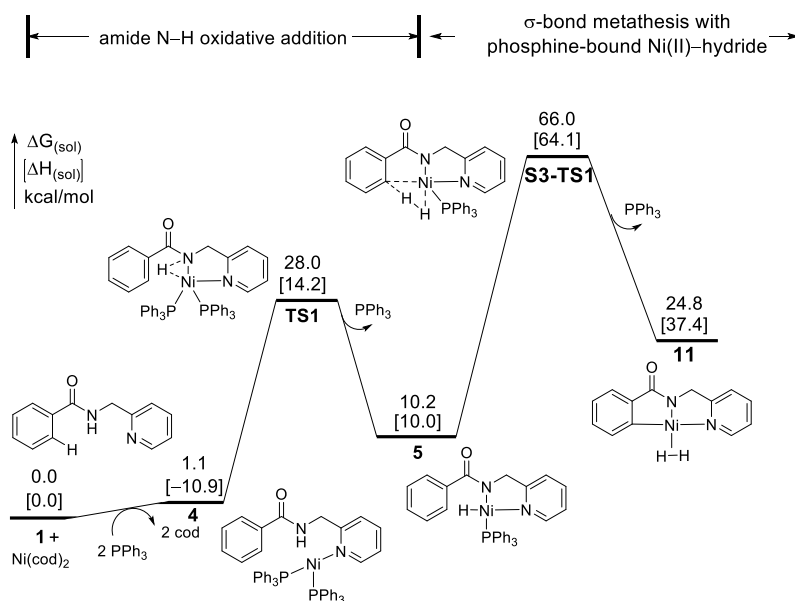

Figure S3. Reaction energy profile of *ortho* C-H metalation mechanism of amide **1** with 2-butyne via  $\sigma$ -bond metathesis with phosphine-bound Ni(II)-hydride complex **5**. All energies are with respect to the separate reactant **1** and Ni(cod)<sub>2</sub>.

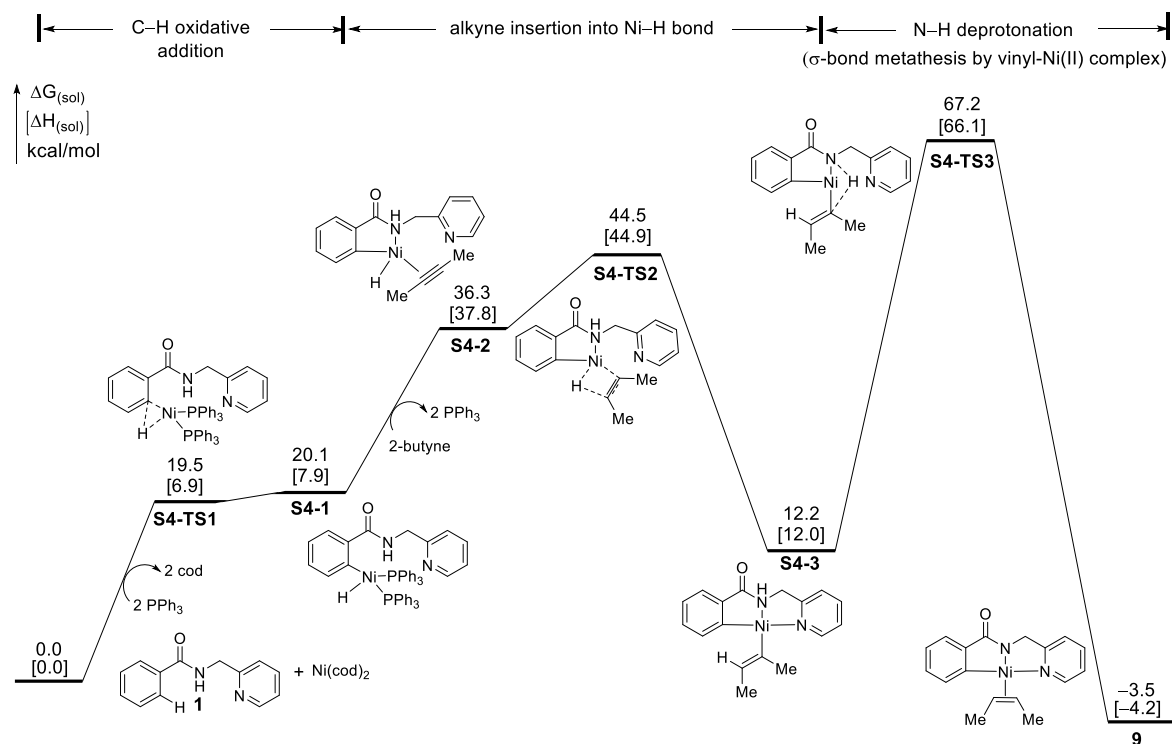

Figure S4. Reaction energy profile of phenyl *ortho* C( $sp^2$ )-H metalation mechanism of amide **1** with 2-butyne via C-H bond oxidative addition by Ni(0) catalyst and subsequent N-H  $\sigma$ -bond metathesis with an alkenyl-Ni(II) complex. All energies are with respect to the separate reactant **1** and Ni(cod)<sub>2</sub>.

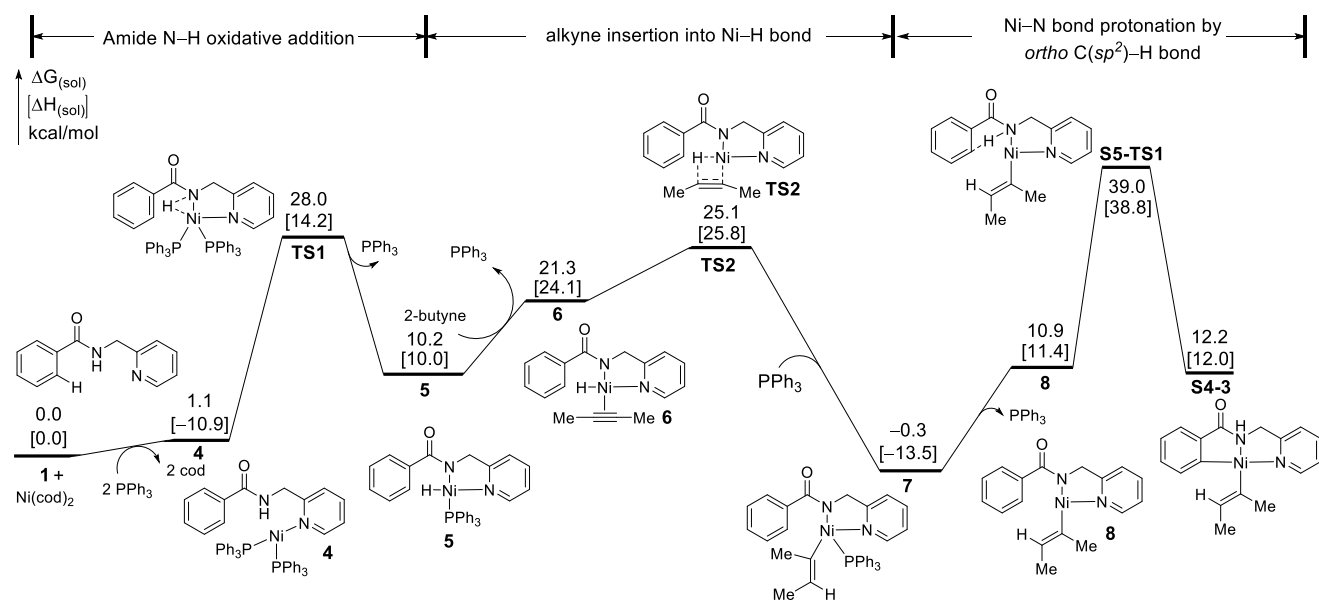

Figure S5. Reaction energy profile of *ortho* C-H metalation of amide **1** with 2-butyne via deprotonation of the *ortho* C( $sp^2$ )-H bond by the amide N. All energies are with respect to the separate reactant **1** and Ni(cod)<sub>2</sub>.

## C–N Reductive Elimination with a Model Substrate Containing 8-Aminoquinoline Directing Group

Amide with 8-aminoquinoline moiety (**19**) has a much higher C–N bond reductive elimination barrier than amide **1** with the 2-pyridinylmethylamine directing group.

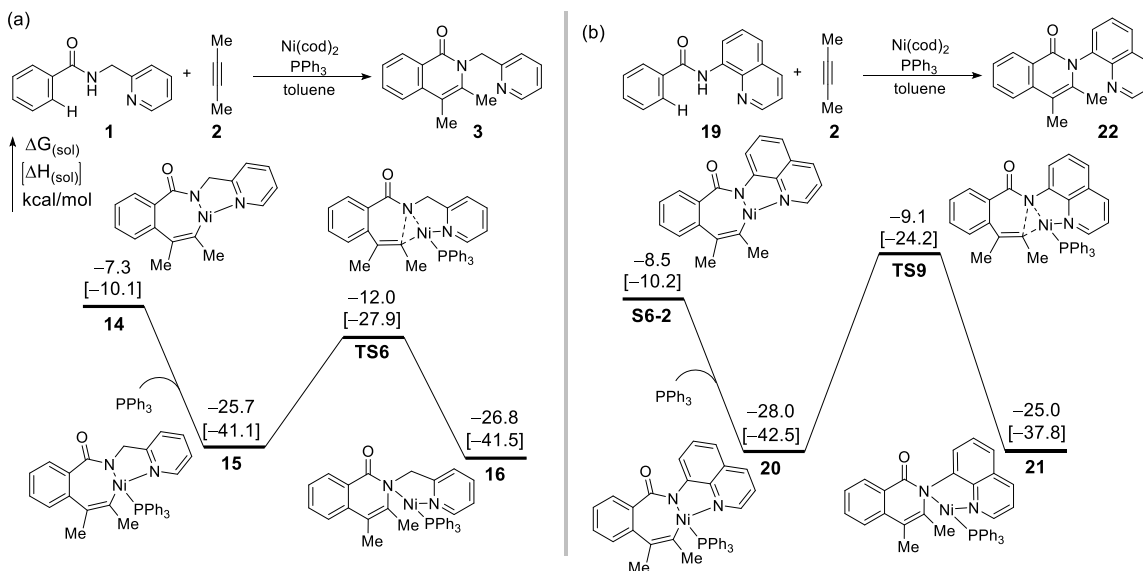

Figure S6. Reaction energy profile of C–N reductive elimination of (a) amide **1** with 2-pyridinylmethylamine directing group (b) amide **19** with 8-aminoquinoline directing group. Energies are with respect to the separate reactants (amide and alkyne),  $\text{PPh}_3$ , and  $\text{Ni}(\text{cod})_2$ .

## Cartesian Coordinates

1

B3LYP electronic energy: -687.34244057 a.u.  
B3LYP enthalpy: -687.102154 a.u.  
B3LYP free energy: -687.158779 a.u.  
M06 SCF energy in solution: -687.05295399 a.u.  
M06 enthalpy in solution: -686.812667 a.u.  
M06 free energy in solution: -686.869292 a.u.

### Cartesian coordinates

| ATOM | X         | Y         | Z         |
|------|-----------|-----------|-----------|
| C    | -2.308068 | 1.091401  | -0.443391 |
| C    | -2.324438 | -0.256903 | -0.058424 |
| C    | -3.526123 | -0.826795 | 0.382929  |
| C    | -4.685702 | -0.058610 | 0.460704  |
| C    | -4.660436 | 1.287562  | 0.086049  |
| C    | -3.471193 | 1.858905  | -0.371388 |
| H    | -1.399060 | 1.543367  | -0.830920 |
| H    | -3.523642 | -1.876749 | 0.656517  |
| H    | -5.610774 | -0.508941 | 0.810772  |
| H    | -5.565248 | 1.886986  | 0.143254  |
| H    | -3.449505 | 2.900901  | -0.679260 |
| C    | -1.115944 | -1.151978 | -0.107903 |
| O    | -1.215237 | -2.378831 | -0.077973 |
| N    | 0.096365  | -0.533808 | -0.187660 |
| H    | 0.213629  | 0.457282  | -0.014104 |
| C    | 1.318258  | -1.304953 | -0.169908 |
| H    | 1.401024  | -1.908952 | -1.084161 |
| H    | 1.299827  | -2.026751 | 0.659945  |
| C    | 2.527226  | -0.396444 | -0.042064 |
| C    | 3.822123  | -0.930035 | -0.095853 |
| C    | 3.353686  | 1.731529  | 0.255029  |
| C    | 4.908998  | -0.072300 | 0.036443  |
| H    | 3.965675  | -1.997704 | -0.238733 |
| C    | 4.674297  | 1.293312  | 0.216676  |
| H    | 3.122396  | 2.786250  | 0.392089  |
| H    | 5.923389  | -0.460043 | -0.001048 |
| H    | 5.492017  | 1.999220  | 0.323416  |
| N    | 2.300215  | 0.912041  | 0.129464  |

2

B3LYP electronic energy: -155.97565014 a.u.  
B3LYP enthalpy: -155.884293 a.u.  
B3LYP free energy: -155.917843 a.u.  
M06 SCF energy in solution: -155.89629461 a.u.  
M06 enthalpy in solution: -155.804937 a.u.  
M06 free energy in solution: -155.838487 a.u.

### Cartesian coordinates

| ATOM | X         | Y         | Z         |
|------|-----------|-----------|-----------|
| C    | 0.000000  | 0.000000  | 0.604618  |
| C    | 0.000000  | 0.000000  | -0.604618 |
| C    | 0.000000  | 0.000000  | 2.066401  |
| H    | -0.510415 | 0.885024  | 2.466657  |
| H    | -0.511246 | -0.884545 | 2.466657  |
| H    | 1.021661  | -0.000479 | 2.466657  |
| C    | 0.000000  | 0.000000  | -2.066401 |
| H    | 0.511246  | -0.884545 | -2.466657 |
| H    | -1.021661 | -0.000479 | -2.466657 |
| H    | 0.510415  | 0.885024  | -2.466657 |

3

B3LYP electronic energy: -842.18848191 a.u.  
 B3LYP enthalpy: -841.874974 a.u.  
 B3LYP free energy: -841.937196 a.u.  
 M06 SCF energy in solution: -841.81451713 a.u.  
 M06 enthalpy in solution: -841.501009 a.u.  
 M06 free energy in solution: -841.563231 a.u.

## Cartesian coordinates

| ATOM | X         | Y         | Z         |
|------|-----------|-----------|-----------|
| H    | 3.935489  | -2.653799 | 1.455121  |
| H    | 5.423956  | -0.722274 | 2.079130  |
| H    | 4.991261  | 1.497705  | 1.021528  |
| C    | -3.970441 | -1.972617 | 0.405679  |
| C    | -2.693720 | -2.015608 | -0.128814 |
| C    | -1.921755 | -0.844284 | -0.218564 |
| C    | -2.424354 | 0.398284  | 0.231780  |
| C    | -3.731390 | 0.414161  | 0.776311  |
| C    | -4.484927 | -0.746586 | 0.860123  |
| H    | -4.568977 | -2.876505 | 0.474282  |
| H    | -4.156238 | 1.344958  | 1.134630  |
| H    | -5.485744 | -0.703949 | 1.282546  |
| C    | -0.576363 | -0.945757 | -0.784025 |
| O    | -0.081968 | -2.009296 | -1.175928 |
| N    | 0.146986  | 0.250600  | -0.860188 |
| C    | 1.497723  | 0.115581  | -1.454274 |
| C    | 2.592416  | -0.173357 | -0.437428 |
| C    | 2.756905  | -1.456672 | 0.102945  |
| C    | 3.782623  | -1.669090 | 1.021293  |
| C    | 4.610676  | -0.601302 | 1.369726  |
| C    | 4.368534  | 0.637994  | 0.778873  |
| N    | 3.386664  | 0.857452  | -0.104896 |
| H    | 2.081930  | -2.249722 | -0.199411 |
| H    | -2.255512 | -2.939956 | -0.489711 |
| H    | 1.425661  | -0.711803 | -2.160826 |
| H    | 1.747461  | 1.025958  | -1.994993 |
| C    | -0.344969 | 1.489899  | -0.415714 |
| C    | -1.603461 | 1.590188  | 0.120357  |
| C    | -2.206161 | 2.893720  | 0.595360  |
| H    | -2.469052 | 2.844635  | 1.660200  |
| H    | -1.545857 | 3.750073  | 0.465155  |
| H    | -3.131643 | 3.119303  | 0.049742  |
| C    | 0.587220  | 2.663810  | -0.598643 |
| H    | 1.603858  | 2.431468  | -0.268958 |
| H    | 0.647361  | 2.959096  | -1.655503 |
| H    | 0.244915  | 3.532627  | -0.039797 |

4

B3LYP electronic energy: -2929.25716193 a.u.  
 B3LYP enthalpy: -2928.427177 a.u.  
 B3LYP free energy: -2928.571265 a.u.  
 M06 SCF energy in solution: -2929.94195799 a.u.  
 M06 enthalpy in solution: -2929.111973 a.u.  
 M06 free energy in solution: -2929.256061 a.u.

## Cartesian coordinates

| ATOM | X         | Y         | Z         |
|------|-----------|-----------|-----------|
| Ni   | 0.356194  | -0.266068 | -0.703124 |
| N    | -1.136046 | 2.459631  | -1.452493 |
| H    | -1.176417 | 1.627901  | -0.866410 |
| C    | -0.021664 | 2.508398  | -2.391277 |
| H    | -0.146650 | 3.415685  | -2.983502 |



|   |           |           |           |
|---|-----------|-----------|-----------|
| H | 0.928199  | 2.594351  | -1.843248 |
| C | 0.044869  | 1.292946  | -3.281867 |
| C | -0.064035 | 1.418084  | -4.669243 |
| C | 0.076869  | 0.299474  | -5.486994 |
| H | -0.252773 | 2.398588  | -5.095805 |
| C | 0.398626  | -0.991111 | -3.491379 |
| C | 0.321551  | -0.932513 | -4.876424 |
| H | -0.001152 | 0.385730  | -6.566797 |
| H | 0.563580  | -1.936615 | -2.984952 |
| H | 0.443223  | -1.841091 | -5.458033 |
| N | 0.264776  | 0.091028  | -2.684500 |
| C | -1.705177 | 3.627543  | -1.010676 |
| O | -1.413157 | 4.723177  | -1.487779 |
| C | -2.717479 | 3.503420  | 0.094848  |
| C | -3.410381 | 2.318778  | 0.381249  |
| C | -2.982796 | 4.653484  | 0.851900  |
| C | -4.340095 | 2.283252  | 1.422585  |
| H | -3.260846 | 1.430935  | -0.224924 |
| C | -3.904222 | 4.614018  | 1.896100  |
| H | -2.458148 | 5.568239  | 0.595961  |
| C | -4.583351 | 3.426817  | 2.185793  |
| H | -4.876844 | 1.361142  | 1.626249  |
| H | -4.097424 | 5.509011  | 2.481763  |
| H | -5.305942 | 3.396353  | 2.997278  |
| P | -1.197437 | -1.594001 | 0.069142  |
| C | -1.468753 | -1.775705 | 1.899702  |
| C | -1.526047 | -3.007347 | 2.568496  |
| C | -1.601080 | -0.597332 | 2.653646  |
| C | -1.709053 | -3.057973 | 3.953833  |
| H | -1.426619 | -3.933251 | 2.010457  |
| C | -1.800518 | -0.647522 | 4.032358  |
| H | -1.544239 | 0.367305  | 2.155236  |
| C | -1.849788 | -1.880385 | 4.688766  |
| H | -1.746220 | -4.021822 | 4.455842  |
| H | -1.904757 | 0.276079  | 4.595685  |
| H | -1.993194 | -1.921171 | 5.765374  |
| C | -2.962414 | -1.410195 | -0.515859 |
| C | -3.169095 | -0.981994 | -1.838661 |
| C | -4.087258 | -1.661314 | 0.287026  |
| C | -4.458461 | -0.823106 | -2.348440 |
| H | -2.310776 | -0.762607 | -2.466435 |
| C | -5.378787 | -1.492295 | -0.220475 |
| H | -3.956671 | -1.989860 | 1.313240  |
| C | -5.568589 | -1.074736 | -1.538965 |
| H | -4.595299 | -0.490985 | -3.374353 |
| H | -6.236994 | -1.690633 | 0.417038  |
| H | -6.573309 | -0.941082 | -1.931085 |
| C | -0.814323 | -3.335676 | -0.466238 |
| C | -1.796511 | -4.298461 | -0.749543 |
| C | 0.536892  | -3.693737 | -0.623653 |
| C | -1.437739 | -5.581171 | -1.170947 |
| H | -2.847237 | -4.045734 | -0.645515 |
| C | 0.895613  | -4.977323 | -1.039300 |
| H | 1.308491  | -2.953356 | -0.427013 |
| C | -0.092221 | -5.925224 | -1.315293 |
| H | -2.212925 | -6.312135 | -1.387129 |
| H | 1.946085  | -5.233033 | -1.152394 |
| H | 0.184248  | -6.923474 | -1.644543 |
| P | 2.145411  | 0.342805  | 0.412479  |
| C | 2.373719  | 2.182390  | 0.546538  |
| C | 3.523787  | 2.865030  | 0.122002  |
| C | 1.305513  | 2.932340  | 1.071546  |
| C | 3.598787  | 4.258269  | 0.213441  |
| H | 4.365328  | 2.311651  | -0.282713 |

|   |          |           |           |
|---|----------|-----------|-----------|
| C | 1.383773 | 4.320639  | 1.168848  |
| H | 0.403165 | 2.423227  | 1.400734  |
| C | 2.531627 | 4.989607  | 0.735113  |
| H | 4.496719 | 4.769871  | -0.124320 |
| H | 0.542961 | 4.880210  | 1.569381  |
| H | 2.589134 | 6.072832  | 0.798823  |
| C | 3.720803 | -0.207400 | -0.417020 |
| C | 4.813752 | -0.763831 | 0.265322  |
| C | 3.800918 | -0.083012 | -1.815781 |
| C | 5.951944 | -1.181460 | -0.430091 |
| H | 4.780961 | -0.873052 | 1.344240  |
| C | 4.943355 | -0.485113 | -2.507834 |
| H | 2.957960 | 0.331739  | -2.360692 |
| C | 6.022710 | -1.041318 | -1.816445 |
| H | 6.785913 | -1.613954 | 0.117193  |
| H | 4.986845 | -0.371893 | -3.588283 |
| H | 6.909797 | -1.364676 | -2.354956 |
| C | 2.465275 | -0.177594 | 2.171525  |
| C | 2.022052 | -1.443163 | 2.583147  |
| C | 3.148176 | 0.626129  | 3.098874  |
| C | 2.259811 | -1.900570 | 3.879843  |
| H | 1.473328 | -2.069297 | 1.886873  |
| C | 3.379293 | 0.173715  | 4.399780  |
| H | 3.501305 | 1.609881  | 2.805764  |
| C | 2.938028 | -1.091243 | 4.793303  |
| H | 1.898728 | -2.880833 | 4.178869  |
| H | 3.905860 | 0.811647  | 5.105402  |
| H | 3.116288 | -1.441052 | 5.806976  |

5

|                              |                     |
|------------------------------|---------------------|
| B3LYP electronic energy:     | -1892.96291400 a.u. |
| B3LYP enthalpy:              | -1892.430254 a.u.   |
| B3LYP free energy:           | -1892.529842 a.u.   |
| M06 SCF energy in solution:  | -1893.98377719 a.u. |
| M06 enthalpy in solution:    | -1893.451117 a.u.   |
| M06 free energy in solution: | -1893.550705 a.u.   |

#### Cartesian coordinates

| ATOM | X         | Y         | Z         |
|------|-----------|-----------|-----------|
| H    | 1.279412  | -6.347923 | 0.917962  |
| H    | 2.818403  | -4.477289 | 1.613881  |
| H    | 2.076678  | -2.133825 | 1.251859  |
| Ni   | -0.555821 | -0.850620 | 0.034920  |
| C    | -5.462262 | 1.748893  | -0.225537 |
| C    | -4.894635 | 0.573190  | -0.715314 |
| C    | -3.943200 | -0.128853 | 0.036463  |
| C    | -3.603359 | 0.345960  | 1.310616  |
| C    | -4.191052 | 1.509197  | 1.814555  |
| C    | -5.113553 | 2.220555  | 1.043227  |
| H    | -6.187449 | 2.291555  | -0.827040 |
| H    | -3.934793 | 1.854245  | 2.813850  |
| H    | -5.568573 | 3.127875  | 1.433182  |
| C    | -3.427447 | -1.438471 | -0.508908 |
| O    | -4.194097 | -2.139362 | -1.189340 |
| N    | -2.170264 | -1.830563 | -0.160283 |
| C    | -1.896623 | -3.210227 | -0.536919 |
| C    | -0.585983 | -3.639147 | 0.054956  |
| C    | -0.235656 | -4.982996 | 0.219117  |
| C    | 0.994873  | -5.308692 | 0.777964  |
| C    | 1.851160  | -4.275892 | 1.165433  |
| C    | 1.442379  | -2.963432 | 0.967367  |
| N    | 0.253231  | -2.642991 | 0.420248  |

|   |           |           |           |
|---|-----------|-----------|-----------|
| H | -0.936297 | -5.754478 | -0.085235 |
| H | -5.186698 | 0.171141  | -1.680347 |
| H | -2.701208 | -3.880719 | -0.204675 |
| H | -1.856586 | -3.342586 | -1.633086 |
| H | -2.888352 | -0.211488 | 1.907633  |
| H | -1.262629 | 0.363529  | -0.380312 |
| P | 1.049258  | 0.672590  | -0.064487 |
| C | 2.769947  | 0.201404  | 0.438231  |
| C | 3.708295  | -0.254889 | -0.500268 |
| C | 3.110992  | 0.161010  | 1.802550  |
| C | 4.957656  | -0.724873 | -0.087913 |
| H | 3.467999  | -0.239255 | -1.558609 |
| C | 4.360933  | -0.305004 | 2.212458  |
| H | 2.399724  | 0.504073  | 2.549233  |
| C | 5.289186  | -0.749800 | 1.267378  |
| H | 5.672705  | -1.068494 | -0.830737 |
| H | 4.608883  | -0.319003 | 3.270533  |
| H | 6.262724  | -1.112224 | 1.586107  |
| C | 1.263123  | 1.232648  | -1.812990 |
| C | 0.553021  | 0.571483  | -2.825571 |
| C | 2.116892  | 2.291698  | -2.162141 |
| C | 0.698863  | 0.955203  | -4.160881 |
| H | -0.127788 | -0.232928 | -2.561514 |
| C | 2.258615  | 2.676187  | -3.494821 |
| H | 2.667801  | 2.825233  | -1.393792 |
| C | 1.550928  | 2.007123  | -4.497342 |
| H | 0.139362  | 0.435209  | -4.933611 |
| H | 2.918661  | 3.500860  | -3.750451 |
| H | 1.660529  | 2.310037  | -5.535272 |
| C | 0.758881  | 2.227866  | 0.894165  |
| C | 1.809637  | 3.092592  | 1.250295  |
| C | -0.552920 | 2.582659  | 1.243309  |
| C | 1.551114  | 4.282465  | 1.930829  |
| H | 2.836221  | 2.833332  | 1.011201  |
| C | -0.808277 | 3.775629  | 1.922465  |
| H | -1.376802 | 1.926857  | 0.984711  |
| C | 0.240306  | 4.628395  | 2.267413  |
| H | 2.375380  | 4.938200  | 2.199026  |
| H | -1.832636 | 4.029737  | 2.180421  |
| H | 0.040453  | 5.555339  | 2.798467  |

6

|                              |                     |
|------------------------------|---------------------|
| B3LYP electronic energy:     | -1012.64110188 a.u. |
| B3LYP enthalpy:              | -1012.309126 a.u.   |
| B3LYP free energy:           | -1012.383729 a.u.   |
| M06 SCF energy in solution:  | -1013.93806468 a.u. |
| M06 enthalpy in solution:    | -1013.606089 a.u.   |
| M06 free energy in solution: | -1013.680692 a.u.   |

Cartesian coordinates

| ATOM | X         | Y         | Z         |
|------|-----------|-----------|-----------|
| H    | -5.340776 | 2.330389  | -0.908825 |
| H    | -5.451362 | -0.183763 | -0.957133 |
| H    | -3.359939 | -1.471778 | -0.450487 |
| Ni   | -0.396323 | -0.636769 | 0.277528  |
| C    | 5.059054  | 0.335230  | 0.430657  |
| C    | 3.886948  | 1.033235  | 0.718696  |
| C    | 2.715453  | 0.795861  | -0.012382 |
| C    | 2.753441  | -0.121712 | -1.071280 |
| C    | 3.932155  | -0.803983 | -1.376625 |
| C    | 5.085387  | -0.586656 | -0.619164 |
| H    | 5.955971  | 0.517843  | 1.017372  |

|   |           |           |           |
|---|-----------|-----------|-----------|
| H | 3.952467  | -1.502876 | -2.209701 |
| H | 6.001614  | -1.123395 | -0.852729 |
| C | 1.506028  | 1.639517  | 0.304738  |
| O | 1.680899  | 2.812202  | 0.668235  |
| N | 0.257886  | 1.111923  | 0.112445  |
| C | -0.784773 | 2.127541  | 0.226620  |
| C | -2.124522 | 1.552508  | -0.130657 |
| C | -3.248590 | 2.344125  | -0.395830 |
| C | -4.459665 | 1.731247  | -0.696471 |
| C | -4.526480 | 0.334454  | -0.725670 |
| C | -3.372175 | -0.385605 | -0.450577 |
| N | -2.199640 | 0.206975  | -0.162014 |
| H | -3.159549 | 3.425789  | -0.365914 |
| H | 3.860743  | 1.779511  | 1.506364  |
| H | -0.836797 | 2.544424  | 1.247084  |
| H | -0.561490 | 2.992433  | -0.413759 |
| C | -1.159928 | -2.432832 | 1.012493  |
| C | -0.853702 | -2.622868 | -0.167699 |
| C | -1.578183 | -2.516744 | 2.418289  |
| H | -1.948097 | -3.523570 | 2.648924  |
| H | -0.734701 | -2.297560 | 3.082058  |
| H | -2.374357 | -1.797805 | 2.641692  |
| C | -0.532988 | -3.149947 | -1.501354 |
| H | -1.056119 | -2.596145 | -2.288871 |
| H | 0.542405  | -3.068818 | -1.693465 |
| H | -0.819174 | -4.206621 | -1.574703 |
| H | 0.928457  | -1.072121 | 0.681445  |
| H | 1.858078  | -0.286533 | -1.661750 |

7

|                              |                     |
|------------------------------|---------------------|
| B3LYP electronic energy:     | -2048.97236024 a.u. |
| B3LYP enthalpy:              | -2048.343272 a.u.   |
| B3LYP free energy:           | -2048.455648 a.u.   |
| M06 SCF energy in solution:  | -2049.92258781 a.u. |
| M06 enthalpy in solution:    | -2049.293500 a.u.   |
| M06 free energy in solution: | -2049.405876 a.u.   |

#### Cartesian coordinates

| ATOM | X         | Y         | Z         |
|------|-----------|-----------|-----------|
| H    | -0.584681 | 6.261885  | 0.699177  |
| H    | -1.857257 | 4.582925  | 2.078581  |
| H    | -1.444567 | 2.163101  | 1.679339  |
| Ni   | 0.563580  | 0.554236  | -0.336559 |
| C    | 5.982289  | -1.341339 | 0.270766  |
| C    | 5.271257  | -0.484225 | -0.568563 |
| C    | 4.159302  | 0.221932  | -0.091489 |
| C    | 3.797682  | 0.085635  | 1.254914  |
| C    | 4.519521  | -0.756228 | 2.102707  |
| C    | 5.608680  | -1.479711 | 1.610973  |
| H    | 6.836175  | -1.892910 | -0.115417 |
| H    | 4.236500  | -0.844430 | 3.149299  |
| H    | 6.169954  | -2.137984 | 2.269804  |
| C    | 3.486989  | 1.210217  | -1.011916 |
| O    | 4.178696  | 1.775293  | -1.876859 |
| N    | 2.182374  | 1.511714  | -0.773304 |
| C    | 1.737874  | 2.745186  | -1.412976 |
| C    | 0.700988  | 3.355382  | -0.504919 |
| C    | 0.500916  | 4.730323  | -0.363992 |
| C    | -0.427240 | 5.195187  | 0.564580  |
| C    | -1.135483 | 4.269443  | 1.331564  |
| C    | -0.901791 | 2.915404  | 1.117123  |
| N    | -0.013696 | 2.462624  | 0.216033  |

|   |           |           |           |
|---|-----------|-----------|-----------|
| H | 1.088428  | 5.418481  | -0.963872 |
| H | 5.570216  | -0.335803 | -1.601309 |
| H | 2.578250  | 3.431281  | -1.568776 |
| H | 1.298821  | 2.579111  | -2.414593 |
| H | 2.953746  | 0.655665  | 1.631302  |
| P | -1.413517 | -0.520156 | 0.012979  |
| C | -1.505741 | -1.171552 | 1.735668  |
| C | -2.445988 | -2.131193 | 2.147957  |
| C | -0.599969 | -0.662371 | 2.679569  |
| C | -2.486357 | -2.556177 | 3.476469  |
| H | -3.137786 | -2.557211 | 1.427555  |
| C | -0.642289 | -1.087828 | 4.008870  |
| H | 0.151732  | 0.056655  | 2.363390  |
| C | -1.587147 | -2.033386 | 4.409551  |
| H | -3.217415 | -3.300094 | 3.781631  |
| H | 0.069739  | -0.688171 | 4.725690  |
| H | -1.617821 | -2.369857 | 5.442330  |
| C | -2.882310 | 0.602013  | -0.148971 |
| C | -3.979880 | 0.588824  | 0.723963  |
| C | -2.885955 | 1.509458  | -1.222392 |
| C | -5.055804 | 1.457189  | 0.523890  |
| H | -3.997673 | -0.093800 | 1.567327  |
| C | -3.967885 | 2.365459  | -1.430675 |
| H | -2.031916 | 1.550770  | -1.893678 |
| C | -5.055414 | 2.343083  | -0.554704 |
| H | -5.896428 | 1.437312  | 1.212537  |
| H | -3.955233 | 3.056132  | -2.269513 |
| H | -5.894999 | 3.015322  | -0.709559 |
| C | -1.924359 | -1.961691 | -1.032349 |
| C | -2.811322 | -1.806046 | -2.108135 |
| C | -1.380208 | -3.233947 | -0.786423 |
| C | -3.144483 | -2.893584 | -2.918985 |
| H | -3.255084 | -0.838727 | -2.316972 |
| C | -1.721899 | -4.319312 | -1.592735 |
| H | -0.687062 | -3.377106 | 0.033836  |
| C | -2.601927 | -4.152597 | -2.664131 |
| H | -3.833273 | -2.751872 | -3.747508 |
| H | -1.294002 | -5.296057 | -1.383910 |
| H | -2.863347 | -4.998817 | -3.293800 |
| C | 1.223324  | -1.076115 | -1.072998 |
| C | 1.710675  | -2.060234 | -0.303851 |
| H | 1.707228  | -1.921646 | 0.778688  |
| C | 1.186146  | -1.075051 | -2.580543 |
| H | 1.826923  | -0.277781 | -2.977804 |
| H | 1.519616  | -2.022861 | -3.022627 |
| H | 0.170085  | -0.884384 | -2.954935 |
| C | 2.357164  | -3.354708 | -0.742561 |
| H | 1.886912  | -4.221077 | -0.254134 |
| H | 2.302859  | -3.513483 | -1.823267 |
| H | 3.417429  | -3.368202 | -0.455627 |

8

|                              |                     |
|------------------------------|---------------------|
| B3LYP electronic energy:     | -1012.67485433 a.u. |
| B3LYP enthalpy:              | -1012.339776 a.u.   |
| B3LYP free energy:           | -1012.410825 a.u.   |
| M06 SCF energy in solution:  | -1013.96140538 a.u. |
| M06 enthalpy in solution:    | -1013.626327 a.u.   |
| M06 free energy in solution: | -1013.697376 a.u.   |

Cartesian coordinates

| ATOM | X        | Y         | Z        |
|------|----------|-----------|----------|
| H    | 5.617913 | -1.393299 | 0.529183 |

|    |           |           |           |
|----|-----------|-----------|-----------|
| H  | 5.009799  | 1.029807  | 0.852459  |
| H  | 2.622565  | 1.710496  | 0.523368  |
| Ni | 0.104304  | 0.225375  | -0.193142 |
| C  | -4.449275 | -0.506630 | 0.796767  |
| C  | -3.504459 | -1.498682 | 0.537568  |
| C  | -2.345342 | -1.193779 | -0.181437 |
| C  | -2.159627 | 0.122237  | -0.653759 |
| C  | -3.105620 | 1.121038  | -0.381487 |
| C  | -4.249761 | 0.806027  | 0.348050  |
| H  | -5.346847 | -0.751588 | 1.359117  |
| H  | -2.941949 | 2.127788  | -0.754027 |
| H  | -4.990401 | 1.572187  | 0.559748  |
| C  | -1.257413 | -2.233927 | -0.327609 |
| O  | -1.477957 | -3.442017 | -0.182800 |
| N  | -0.064966 | -1.638823 | -0.534794 |
| C  | 1.134928  | -2.428001 | -0.435356 |
| C  | 2.273739  | -1.505560 | -0.078328 |
| C  | 3.589701  | -1.953363 | 0.065934  |
| C  | 4.593088  | -1.054099 | 0.407776  |
| C  | 4.260861  | 0.290245  | 0.589632  |
| C  | 2.939709  | 0.680241  | 0.422878  |
| N  | 1.963375  | -0.194597 | 0.100467  |
| H  | 3.807462  | -3.005829 | -0.088088 |
| H  | 1.034348  | -3.220437 | 0.324061  |
| H  | 1.378701  | -2.951392 | -1.375524 |
| C  | 0.186843  | 2.105622  | 0.141978  |
| C  | 0.517076  | 2.961466  | -0.840447 |
| H  | 0.792491  | 2.543734  | -1.814297 |
| C  | -0.190543 | 2.506361  | 1.551120  |
| H  | -0.186455 | 3.591802  | 1.720941  |
| H  | -1.191698 | 2.137021  | 1.810175  |
| H  | 0.497844  | 2.059287  | 2.283277  |
| C  | 0.564715  | 4.473774  | -0.805539 |
| H  | -0.118855 | 4.906228  | -1.549828 |
| H  | 0.294001  | 4.886152  | 0.170694  |
| H  | 1.569246  | 4.843463  | -1.057352 |
| H  | -1.392843 | 0.333432  | -1.420492 |
| H  | -3.632748 | -2.517104 | 0.890797  |

9

|                              |                     |
|------------------------------|---------------------|
| B3LYP electronic energy:     | -1012.69342946 a.u. |
| B3LYP enthalpy:              | -1012.356917 a.u.   |
| B3LYP free energy:           | -1012.426001 a.u.   |
| M06 SCF energy in solution:  | -1013.98777136 a.u. |
| M06 enthalpy in solution:    | -1013.651259 a.u.   |
| M06 free energy in solution: | -1013.720343 a.u.   |

#### Cartesian coordinates

| ATOM | X         | Y         | Z         |
|------|-----------|-----------|-----------|
| H    | 5.549404  | 1.738288  | -0.001500 |
| H    | 5.220618  | -0.763601 | -0.001490 |
| H    | 2.913710  | -1.649872 | -0.000568 |
| Ni   | -0.038047 | -0.336988 | 0.000275  |
| C    | -4.785144 | 0.225307  | -0.000797 |
| C    | -3.870258 | 1.280186  | -0.000569 |
| C    | -2.505807 | 1.001433  | -0.000196 |
| C    | -1.998477 | -0.309605 | -0.000024 |
| C    | -2.932624 | -1.352310 | -0.000209 |
| C    | -4.311666 | -1.086622 | -0.000605 |
| H    | -5.854237 | 0.422121  | -0.001094 |
| H    | -2.627109 | -2.397320 | -0.000022 |
| H    | -5.014364 | -1.917534 | -0.000758 |

|   |           |           |           |
|---|-----------|-----------|-----------|
| C | -1.472815 | 2.073976  | 0.000163  |
| O | -1.686529 | 3.289267  | 0.000370  |
| N | -0.235656 | 1.504131  | 0.000347  |
| C | 0.909444  | 2.372140  | 0.001132  |
| C | 2.152255  | 1.535089  | 0.000190  |
| C | 3.427021  | 2.113975  | -0.000399 |
| C | 4.553843  | 1.303791  | -0.000998 |
| C | 4.376593  | -0.081774 | -0.001027 |
| C | 3.083476  | -0.583906 | -0.000471 |
| N | 1.979280  | 0.191474  | 0.000142  |
| H | 3.513125  | 3.196390  | -0.000393 |
| H | -4.189490 | 2.319416  | -0.000654 |
| H | 0.917032  | 3.044729  | -0.873328 |
| H | 0.917401  | 3.042730  | 0.877181  |
| C | 0.047790  | -2.453000 | -0.685300 |
| C | 0.047843  | -2.452919 | 0.686165  |
| H | -0.906989 | -2.320563 | -1.184977 |
| H | -0.906895 | -2.320473 | 1.185908  |
| C | 1.158016  | -2.883775 | 1.610961  |
| H | 2.054394  | -3.231593 | 1.091531  |
| H | 1.445913  | -2.078788 | 2.297356  |
| H | 0.798659  | -3.714320 | 2.232308  |
| C | 1.157740  | -2.883975 | -1.610345 |
| H | 1.445261  | -2.079054 | -2.296986 |
| H | 2.054314  | -3.231719 | -1.091237 |
| H | 0.798058  | -3.714613 | -2.231379 |

10

|                              |                    |
|------------------------------|--------------------|
| B3LYP electronic energy:     | -856.64492133 a.u. |
| B3LYP enthalpy:              | -856.406682 a.u.   |
| B3LYP free energy:           | -856.463590 a.u.   |
| M06 SCF energy in solution:  | -858.01435687 a.u. |
| M06 enthalpy in solution:    | -857.776118 a.u.   |
| M06 free energy in solution: | -857.833026 a.u.   |

#### Cartesian coordinates

| ATOM | X         | Y         | Z         |
|------|-----------|-----------|-----------|
| H    | 5.671025  | 0.306412  | -0.574297 |
| H    | 4.879642  | -2.077960 | -0.730815 |
| H    | 2.445030  | -2.548829 | -0.366782 |
| Ni   | 0.092956  | -0.842124 | 0.294336  |
| C    | -4.316298 | -0.095727 | -0.896954 |
| C    | -3.371511 | 0.903066  | -0.661502 |
| C    | -2.242861 | 0.631448  | 0.114695  |
| C    | -2.085360 | -0.660367 | 0.667627  |
| C    | -3.031975 | -1.665267 | 0.416311  |
| C    | -4.145881 | -1.382919 | -0.370590 |
| H    | -5.191333 | 0.124347  | -1.503425 |
| H    | -2.895502 | -2.649585 | 0.853614  |
| H    | -4.884892 | -2.154212 | -0.568010 |
| C    | -1.133920 | 1.657155  | 0.211672  |
| O    | -1.312116 | 2.855124  | -0.030717 |
| N    | 0.032632  | 1.038383  | 0.489508  |
| C    | 1.279142  | 1.742017  | 0.324483  |
| C    | 2.351759  | 0.719540  | 0.032403  |
| C    | 3.696183  | 1.053812  | -0.147574 |
| C    | 4.624260  | 0.056553  | -0.426826 |
| C    | 4.190547  | -1.268442 | -0.515292 |
| C    | 2.844824  | -1.544501 | -0.318785 |
| N    | 1.944442  | -0.574873 | -0.051035 |
| H    | 3.996937  | 2.094222  | -0.071146 |
| H    | -3.474696 | 1.898178  | -1.082932 |

|   |           |           |           |
|---|-----------|-----------|-----------|
| H | 1.221586  | 2.478648  | -0.493140 |
| H | 1.563589  | 2.316798  | 1.221921  |
| H | 0.142167  | -2.342657 | 0.172087  |
| H | -1.372348 | -0.829679 | 1.499926  |

11

|                              |                    |
|------------------------------|--------------------|
| B3LYP electronic energy:     | -856.63799857 a.u. |
| B3LYP enthalpy:              | -856.401976 a.u.   |
| B3LYP free energy:           | -856.458673 a.u.   |
| M06 SCF energy in solution:  | -858.01603405 a.u. |
| M06 enthalpy in solution:    | -857.780011 a.u.   |
| M06 free energy in solution: | -857.836708 a.u.   |

Cartesian coordinates

| ATOM | X         | Y         | Z         |
|------|-----------|-----------|-----------|
| H    | -5.755299 | 0.469369  | -0.000265 |
| H    | -5.097303 | -1.961419 | 0.000540  |
| H    | -2.673691 | -2.533440 | 0.000695  |
| Ni   | -0.043778 | -0.827336 | -0.000017 |
| C    | 4.605333  | -0.093464 | 0.000058  |
| C    | 3.663355  | 0.940802  | 0.000207  |
| C    | 2.309009  | 0.622445  | 0.000106  |
| C    | 1.858986  | -0.708445 | -0.000111 |
| C    | 2.806862  | -1.733692 | -0.000262 |
| C    | 4.176768  | -1.421971 | -0.000192 |
| H    | 5.668136  | 0.134855  | 0.000126  |
| H    | 2.508028  | -2.780848 | -0.000442 |
| H    | 4.909357  | -2.226456 | -0.000326 |
| C    | 1.214847  | 1.641831  | 0.000130  |
| O    | 1.348535  | 2.865478  | 0.000312  |
| N    | 0.012071  | 0.992485  | -0.000121 |
| C    | -1.226435 | 1.727594  | -0.000216 |
| C    | -2.366930 | 0.744340  | -0.000178 |
| C    | -3.708387 | 1.139916  | -0.000374 |
| C    | -4.709477 | 0.176016  | -0.000132 |
| C    | -4.350061 | -1.175076 | 0.000300  |
| C    | -3.001345 | -1.498422 | 0.000410  |
| N    | -2.025959 | -0.567125 | 0.000156  |
| H    | -3.949813 | 2.198433  | -0.000696 |
| H    | 3.961701  | 1.986281  | 0.000377  |
| H    | -1.312155 | 2.390351  | 0.877053  |
| H    | -1.312071 | 2.390296  | -0.877525 |
| H    | -0.023595 | -2.487425 | 0.394354  |
| H    | -0.023708 | -2.487201 | -0.394649 |

12

|                              |                    |
|------------------------------|--------------------|
| B3LYP electronic energy:     | -855.44423500 a.u. |
| B3LYP enthalpy:              | -855.225872 a.u.   |
| B3LYP free energy:           | -855.281979 a.u.   |
| M06 SCF energy in solution:  | -856.81731860 a.u. |
| M06 enthalpy in solution:    | -856.598956 a.u.   |
| M06 free energy in solution: | -856.655063 a.u.   |

Cartesian coordinates

| ATOM | X         | Y         | Z         |
|------|-----------|-----------|-----------|
| H    | -5.751522 | 0.396166  | 0.000247  |
| H    | -5.073164 | -2.028362 | 0.000088  |
| H    | -2.640604 | -2.579049 | -0.000121 |
| Ni   | -0.044244 | -0.824532 | -0.000063 |
| C    | 4.595476  | -0.169443 | 0.000079  |



|   |           |           |           |
|---|-----------|-----------|-----------|
| C | 3.671779  | 0.881130  | 0.000057  |
| C | 2.312541  | 0.582135  | 0.000018  |
| C | 1.840789  | -0.742223 | 0.000003  |
| C | 2.772097  | -1.783609 | 0.000030  |
| C | 4.146593  | -1.492101 | 0.000067  |
| H | 5.661964  | 0.041081  | 0.000107  |
| H | 2.457194  | -2.827224 | 0.000020  |
| H | 4.867957  | -2.306770 | 0.000087  |
| C | 1.229638  | 1.613634  | -0.000013 |
| O | 1.364903  | 2.836706  | -0.000027 |
| N | 0.013944  | 0.984403  | -0.000025 |
| C | -1.234668 | 1.701826  | -0.000087 |
| C | -2.366535 | 0.703255  | -0.000019 |
| C | -3.710990 | 1.086219  | 0.000106  |
| C | -4.703180 | 0.112091  | 0.000146  |
| C | -4.332532 | -1.235858 | 0.000063  |
| C | -2.980626 | -1.546955 | -0.000051 |
| N | -2.015945 | -0.605511 | -0.000087 |
| H | -3.963448 | 2.142190  | 0.000173  |
| H | 3.990509  | 1.920509  | 0.000064  |
| H | -1.328771 | 2.361015  | 0.878711  |
| H | -1.328779 | 2.360856  | -0.879009 |

13

|                              |                     |
|------------------------------|---------------------|
| B3LYP electronic energy:     | -1011.46027935 a.u. |
| B3LYP enthalpy:              | -1011.148421 a.u.   |
| B3LYP free energy:           | -1011.218805 a.u.   |
| M06 SCF energy in solution:  | -1012.76132676 a.u. |
| M06 enthalpy in solution:    | -1012.449468 a.u.   |
| M06 free energy in solution: | -1012.519852 a.u.   |

#### Cartesian coordinates

| ATOM | X         | Y         | Z         |
|------|-----------|-----------|-----------|
| H    | -5.754504 | 1.076019  | -0.000363 |
| H    | -5.141540 | -1.366801 | -0.000084 |
| H    | -2.716282 | -1.980156 | 0.000214  |
| Ni   | -0.022139 | -0.357961 | 0.000389  |
| C    | 4.634835  | 0.459573  | 0.000128  |
| C    | 3.669595  | 1.471231  | -0.000023 |
| C    | 2.321174  | 1.125678  | 0.000139  |
| C    | 1.893418  | -0.214504 | 0.000401  |
| C    | 2.868495  | -1.215421 | 0.000542  |
| C    | 4.232045  | -0.876705 | 0.000429  |
| H    | 5.692645  | 0.710899  | 0.000019  |
| H    | 2.591142  | -2.267241 | 0.000742  |
| H    | 4.980448  | -1.667025 | 0.000559  |
| C    | 1.219840  | 2.137244  | 0.000067  |
| O    | 1.358730  | 3.362737  | -0.000395 |
| N    | 0.022404  | 1.485368  | 0.000583  |
| C    | -1.201270 | 2.243447  | 0.000298  |
| C    | -2.360671 | 1.284561  | 0.000140  |
| C    | -3.694689 | 1.707318  | -0.000098 |
| C    | -4.714246 | 0.762817  | -0.000184 |
| C    | -4.379292 | -0.594534 | -0.000035 |
| C    | -3.035859 | -0.942712 | 0.000167  |
| N    | -2.044569 | -0.031029 | 0.000261  |
| H    | -3.915221 | 2.770557  | -0.000212 |
| H    | 3.942180  | 2.523838  | -0.000248 |
| H    | -1.275113 | 2.910100  | 0.876249  |
| H    | -1.274710 | 2.910040  | -0.875724 |
| C    | -0.092814 | -2.378672 | 0.614884  |
| C    | -0.092411 | -2.378084 | -0.616448 |

|   |           |           |           |
|---|-----------|-----------|-----------|
| C | -0.052043 | -2.656302 | 2.056679  |
| H | -0.126372 | -3.735192 | 2.241414  |
| H | 0.888820  | -2.293768 | 2.484799  |
| H | -0.873389 | -2.159126 | 2.584340  |
| C | -0.050612 | -2.653719 | -2.058567 |
| H | -0.872155 | -2.156603 | -2.585981 |
| H | 0.890157  | -2.289754 | -2.485674 |
| H | -0.123855 | -3.732431 | -2.244794 |

14

|                              |                     |
|------------------------------|---------------------|
| B3LYP electronic energy:     | -1011.46731376 a.u. |
| B3LYP enthalpy:              | -1011.154777 a.u.   |
| B3LYP free energy:           | -1011.219936 a.u.   |
| M06 SCF energy in solution:  | -1012.76088936 a.u. |
| M06 enthalpy in solution:    | -1012.448353 a.u.   |
| M06 free energy in solution: | -1012.513512 a.u.   |

#### Cartesian coordinates

| ATOM | X         | Y         | Z         |
|------|-----------|-----------|-----------|
| H    | 6.095805  | -1.444901 | -0.466737 |
| H    | 5.872284  | 0.996823  | -1.035072 |
| H    | 3.622857  | 2.059535  | -0.839386 |
| Ni   | 0.792880  | 0.907458  | -0.007856 |
| C    | -4.246895 | -2.053333 | -0.786209 |
| C    | -2.948815 | -2.151865 | -0.302023 |
| C    | -2.175347 | -1.028714 | 0.053377  |
| C    | -2.766019 | 0.261851  | -0.057695 |
| C    | -4.100898 | 0.327886  | -0.521316 |
| C    | -4.831191 | -0.793236 | -0.893002 |
| H    | -4.796007 | -2.949859 | -1.061387 |
| H    | -4.578692 | 1.296318  | -0.610333 |
| H    | -5.848827 | -0.678705 | -1.258015 |
| C    | -0.818409 | -1.462959 | 0.586768  |
| O    | -0.781196 | -2.510487 | 1.252206  |
| N    | 0.342175  | -0.860317 | 0.190253  |
| C    | 1.518779  | -1.640016 | 0.582932  |
| C    | 2.780396  | -0.975452 | 0.113664  |
| C    | 4.006963  | -1.641681 | 0.021906  |
| C    | 5.136045  | -0.942105 | -0.388964 |
| C    | 5.017873  | 0.414747  | -0.706381 |
| C    | 3.769943  | 1.010914  | -0.597557 |
| N    | 2.675572  | 0.334494  | -0.195870 |
| H    | 4.060672  | -2.696830 | 0.271248  |
| H    | -2.496322 | -3.126878 | -0.165951 |
| H    | 1.570651  | -1.770831 | 1.676574  |
| H    | 1.455038  | -2.660408 | 0.181744  |
| C    | -0.786808 | 1.725900  | 0.242762  |
| C    | -2.114440 | 1.557032  | 0.257051  |
| C    | -3.009404 | 2.762794  | 0.515771  |
| H    | -2.441483 | 3.578614  | 0.971369  |
| H    | -3.460570 | 3.155391  | -0.405974 |
| H    | -3.830900 | 2.509982  | 1.195778  |
| C    | 0.027546  | 2.986298  | 0.338385  |
| H    | -0.242320 | 3.746739  | -0.403786 |
| H    | 0.070380  | 3.431849  | 1.339635  |
| H    | 1.116221  | 2.760640  | 0.095137  |

15

|                          |                     |
|--------------------------|---------------------|
| B3LYP electronic energy: | -2047.78046699 a.u. |
| B3LYP enthalpy:          | -2047.173732 a.u.   |

B3LYP free energy: -2047.282009 a.u.  
 M06 SCF energy in solution: -2048.73200194 a.u.  
 M06 enthalpy in solution: -2048.125267 a.u.  
 M06 free energy in solution: -2048.233544 a.u.

Cartesian coordinates

| ATOM | X         | Y         | Z         |
|------|-----------|-----------|-----------|
| H    | -0.933836 | 6.461968  | -0.334151 |
| H    | -2.456559 | 4.705462  | -1.306666 |
| H    | -1.875990 | 2.313149  | -0.965878 |
| Ni   | 0.490901  | 0.793715  | 0.738469  |
| C    | 4.395558  | -1.114486 | -2.097897 |
| C    | 4.187714  | 0.041462  | -1.350995 |
| C    | 3.440025  | 0.027245  | -0.161157 |
| C    | 2.926293  | -1.201976 | 0.319700  |
| C    | 3.172778  | -2.363400 | -0.438099 |
| C    | 3.877872  | -2.327317 | -1.638298 |
| H    | 4.967748  | -1.072188 | -3.021463 |
| H    | 2.785301  | -3.313381 | -0.080628 |
| H    | 4.031229  | -3.242825 | -2.205019 |
| C    | 3.311904  | 1.382075  | 0.510733  |
| O    | 4.283398  | 2.156442  | 0.479061  |
| N    | 2.095819  | 1.717824  | 1.006606  |
| C    | 1.896600  | 3.105963  | 1.357132  |
| C    | 0.675418  | 3.625976  | 0.632953  |
| C    | 0.410469  | 4.991937  | 0.491398  |
| C    | -0.720671 | 5.404335  | -0.204810 |
| C    | -1.567819 | 4.435065  | -0.745782 |
| C    | -1.247286 | 3.096211  | -0.557004 |
| N    | -0.156752 | 2.689693  | 0.120726  |
| H    | 1.101669  | 5.713560  | 0.916558  |
| H    | 4.617554  | 0.987661  | -1.663439 |
| H    | 1.742759  | 3.238214  | 2.442745  |
| H    | 2.786087  | 3.690222  | 1.090371  |
| C    | 1.168259  | -0.528606 | 1.911738  |
| C    | 2.215720  | -1.319940 | 1.628022  |
| C    | 2.802761  | -2.357317 | 2.573140  |
| H    | 2.285528  | -2.389527 | 3.534966  |
| H    | 2.757792  | -3.367539 | 2.145633  |
| H    | 3.862552  | -2.146606 | 2.769955  |
| C    | 0.471479  | -0.421017 | 3.247736  |
| H    | -0.622716 | -0.446962 | 3.152451  |
| H    | 0.756224  | -1.208788 | 3.957312  |
| H    | 0.714935  | 0.541289  | 3.720642  |
| P    | -1.171427 | -0.555814 | -0.044449 |
| C    | -1.373488 | -0.179778 | -1.844191 |
| C    | -2.611011 | -0.148375 | -2.504334 |
| C    | -0.203495 | 0.099948  | -2.573355 |
| C    | -2.677160 | 0.153233  | -3.866617 |
| H    | -3.525758 | -0.352391 | -1.956893 |
| C    | -0.273200 | 0.388785  | -3.936942 |
| H    | 0.761836  | 0.092120  | -2.072569 |
| C    | -1.510084 | 0.419049  | -4.585293 |
| H    | -3.642598 | 0.178568  | -4.365224 |
| H    | 0.639609  | 0.597252  | -4.487963 |
| H    | -1.564272 | 0.652526  | -5.645252 |
| C    | -0.921800 | -2.386748 | -0.013750 |
| C    | -0.991736 | -3.060932 | 1.217290  |
| C    | -0.621324 | -3.119716 | -1.169399 |
| C    | -0.776508 | -4.436126 | 1.285754  |
| H    | -1.221698 | -2.513982 | 2.126098  |
| C    | -0.401371 | -4.498068 | -1.097288 |
| H    | -0.555259 | -2.621226 | -2.130378 |
| C    | -0.478728 | -5.159599 | 0.127659  |

|   |           |           |           |
|---|-----------|-----------|-----------|
| H | -0.837800 | -4.942228 | 2.245468  |
| H | -0.170773 | -5.051076 | -2.003920 |
| H | -0.308866 | -6.231575 | 0.182269  |
| C | -2.857882 | -0.373373 | 0.687485  |
| C | -3.876570 | -1.322183 | 0.492063  |
| C | -3.126638 | 0.752959  | 1.480915  |
| C | -5.136385 | -1.136480 | 1.061964  |
| H | -3.679628 | -2.213876 | -0.095869 |
| C | -4.387980 | 0.937079  | 2.051690  |
| H | -2.340896 | 1.481411  | 1.659449  |
| C | -5.395091 | -0.005592 | 1.840943  |
| H | -5.914418 | -1.878352 | 0.902826  |
| H | -4.578641 | 1.812187  | 2.667069  |
| H | -6.375320 | 0.134241  | 2.288690  |

16

|                              |                     |
|------------------------------|---------------------|
| B3LYP electronic energy:     | -2047.78815697 a.u. |
| B3LYP enthalpy:              | -2047.180333 a.u.   |
| B3LYP free energy:           | -2047.289682 a.u.   |
| M06 SCF energy in solution:  | -2048.73372173 a.u. |
| M06 enthalpy in solution:    | -2048.125898 a.u.   |
| M06 free energy in solution: | -2048.235247 a.u.   |

#### Cartesian coordinates

| ATOM | X         | Y         | Z         |
|------|-----------|-----------|-----------|
| N    | 2.072412  | 1.777850  | -0.239662 |
| C    | 2.043447  | 0.739900  | -1.254270 |
| C    | 2.813433  | -0.469000 | -0.950894 |
| C    | 3.526267  | -0.600994 | 0.268483  |
| C    | 2.885503  | -1.474634 | -1.931683 |
| C    | 3.625042  | -2.625544 | -1.707685 |
| H    | 2.343205  | -1.321568 | -2.858023 |
| C    | 4.320684  | -2.779202 | -0.497954 |
| H    | 3.668427  | -3.402412 | -2.466039 |
| H    | 4.904089  | -3.678018 | -0.315696 |
| O    | 1.615944  | 1.034976  | -2.392241 |
| C    | 2.722978  | 1.583322  | 1.012930  |
| C    | 3.443883  | 0.451368  | 1.269209  |
| C    | 4.151405  | 0.231033  | 2.587226  |
| H    | 3.761477  | -0.653868 | 3.107578  |
| H    | 5.224529  | 0.062778  | 2.430732  |
| H    | 4.061894  | 1.078705  | 3.266721  |
| C    | 2.538450  | 2.712684  | 2.002219  |
| H    | 2.539256  | 2.340706  | 3.027919  |
| H    | 3.331075  | 3.470138  | 1.928068  |
| H    | 1.580517  | 3.214532  | 1.848184  |
| C    | 4.274578  | -1.782745 | 0.468658  |
| H    | 4.826734  | -1.919614 | 1.392220  |
| C    | 1.932297  | 3.152534  | -0.767021 |
| H    | 2.071313  | 3.060506  | -1.849091 |
| H    | 2.725328  | 3.791813  | -0.368027 |
| C    | 0.569060  | 3.761500  | -0.514163 |
| C    | 0.335343  | 5.124413  | -0.707465 |
| C    | -0.950777 | 5.626687  | -0.521274 |
| H    | 1.152081  | 5.776740  | -1.004206 |
| C    | -1.652554 | 3.402889  | 0.036967  |
| C    | -1.965662 | 4.746188  | -0.142493 |
| H    | -1.156240 | 6.683301  | -0.667855 |
| H    | -2.405148 | 2.682824  | 0.339269  |
| H    | -2.982874 | 5.089755  | 0.016531  |
| N    | -0.410628 | 2.909942  | -0.143268 |
| Ni   | 0.159669  | 0.956920  | -0.109847 |

|   |           |           |           |
|---|-----------|-----------|-----------|
| P | -1.128177 | -0.724304 | 0.084766  |
| C | -1.432899 | -1.715093 | -1.454831 |
| C | -2.102351 | -2.950034 | -1.450189 |
| C | -0.959168 | -1.204686 | -2.673741 |
| C | -2.305803 | -3.651829 | -2.638699 |
| H | -2.458930 | -3.369956 | -0.514030 |
| C | -1.166725 | -1.908639 | -3.863356 |
| H | -0.404403 | -0.270345 | -2.687746 |
| C | -1.841042 | -3.130299 | -3.849176 |
| H | -2.823833 | -4.607556 | -2.619517 |
| H | -0.791757 | -1.502068 | -4.799208 |
| H | -1.998180 | -3.679086 | -4.774466 |
| C | -2.843203 | -0.187300 | 0.579887  |
| C | -3.000873 | 0.451214  | 1.824764  |
| C | -3.961364 | -0.284333 | -0.260963 |
| C | -4.238109 | 0.957217  | 2.222229  |
| H | -2.144131 | 0.550402  | 2.487647  |
| C | -5.199349 | 0.235545  | 0.131136  |
| H | -3.870345 | -0.769239 | -1.227617 |
| C | -5.344467 | 0.853862  | 1.372918  |
| H | -4.338389 | 1.435659  | 3.193528  |
| H | -6.052179 | 0.150009  | -0.537842 |
| H | -6.308443 | 1.252471  | 1.678223  |
| C | -0.788651 | -2.057323 | 1.339561  |
| C | -1.777373 | -2.674426 | 2.122402  |
| C | 0.542813  | -2.476144 | 1.488620  |
| C | -1.441340 | -3.684048 | 3.028096  |
| H | -2.813854 | -2.363869 | 2.033160  |
| C | 0.876535  | -3.491634 | 2.385048  |
| H | 1.319789  | -2.002946 | 0.897638  |
| C | -0.114653 | -4.097091 | 3.160855  |
| H | -2.219699 | -4.148354 | 3.628875  |
| H | 1.913598  | -3.804042 | 2.478072  |
| H | 0.144833  | -4.883115 | 3.865563  |

17

|                              |                     |
|------------------------------|---------------------|
| B3LYP electronic energy:     | -1011.48456289 a.u. |
| B3LYP enthalpy:              | -1011.169746 a.u.   |
| B3LYP free energy:           | -1011.234462 a.u.   |
| M06 SCF energy in solution:  | -1012.78216964 a.u. |
| M06 enthalpy in solution:    | -1012.467353 a.u.   |
| M06 free energy in solution: | -1012.532069 a.u.   |

Cartesian coordinates

| ATOM | X         | Y         | Z         |
|------|-----------|-----------|-----------|
| N    | 0.046435  | -0.316211 | 1.361314  |
| C    | -0.690215 | -1.415083 | 0.916464  |
| C    | -1.949774 | -1.117752 | 0.206186  |
| C    | -2.278841 | 0.204732  | -0.186931 |
| C    | -2.772020 | -2.201785 | -0.131433 |
| C    | -3.943128 | -2.006008 | -0.850866 |
| H    | -2.457960 | -3.190884 | 0.185396  |
| C    | -4.288144 | -0.705736 | -1.242220 |
| H    | -4.580908 | -2.847192 | -1.106960 |
| H    | -5.202968 | -0.533559 | -1.804567 |
| O    | -0.271077 | -2.562076 | 1.087860  |
| C    | -0.298099 | 1.060374  | 1.071442  |
| C    | -1.419612 | 1.335146  | 0.199520  |
| C    | -2.056842 | 2.718099  | 0.163811  |
| H    | -2.436369 | 2.944969  | -0.837930 |
| H    | -2.905992 | 2.810008  | 0.859594  |
| H    | -1.341639 | 3.509015  | 0.398636  |

|    |           |           |           |
|----|-----------|-----------|-----------|
| C  | 0.171934  | 2.035617  | 2.140025  |
| H  | -0.201019 | 3.040948  | 1.947442  |
| H  | -0.201850 | 1.721303  | 3.125483  |
| H  | 1.262451  | 2.109291  | 2.202512  |
| Ni | 0.417039  | 1.181738  | -0.655169 |
| C  | -3.477135 | 0.375388  | -0.916938 |
| H  | -3.779486 | 1.368388  | -1.230066 |
| C  | 1.454188  | -0.588497 | 1.640786  |
| H  | 1.508416  | -1.597904 | 2.047882  |
| H  | 1.812187  | 0.103107  | 2.408909  |
| C  | 2.399563  | -0.507950 | 0.433358  |
| C  | 3.540974  | -1.312855 | 0.433143  |
| C  | 4.462297  | -1.228479 | -0.607994 |
| H  | 3.694013  | -2.008925 | 1.252303  |
| C  | 3.062198  | 0.443157  | -1.589240 |
| C  | 4.216896  | -0.326350 | -1.642554 |
| H  | 5.348194  | -1.856641 | -0.613584 |
| H  | 2.834296  | 1.159536  | -2.372094 |
| H  | 4.900468  | -0.217763 | -2.478338 |
| N  | 2.158460  | 0.362231  | -0.584475 |

18

|                              |                     |
|------------------------------|---------------------|
| B3LYP electronic energy:     | -1012.69417319 a.u. |
| B3LYP enthalpy:              | -1012.358004 a.u.   |
| B3LYP free energy:           | -1012.423398 a.u.   |
| M06 SCF energy in solution:  | -1013.98985502 a.u. |
| M06 enthalpy in solution:    | -1013.653686 a.u.   |
| M06 free energy in solution: | -1013.719080 a.u.   |

#### Cartesian coordinates

| ATOM | X         | Y         | Z         |
|------|-----------|-----------|-----------|
| H    | -6.031777 | -1.595633 | 0.078312  |
| H    | -5.955289 | 0.868700  | -0.436784 |
| H    | -3.728321 | 1.978489  | -0.590487 |
| Ni   | -0.786345 | 0.900139  | -0.299277 |
| C    | 4.591965  | -1.522536 | -0.754754 |
| C    | 3.259666  | -1.835260 | -0.509267 |
| C    | 2.328547  | -0.879672 | -0.056583 |
| C    | 2.786625  | 0.439842  | 0.171136  |
| C    | 4.142630  | 0.729055  | -0.055563 |
| C    | 5.044246  | -0.226097 | -0.515741 |
| H    | 5.271896  | -2.289568 | -1.116396 |
| H    | 4.493774  | 1.741639  | 0.132139  |
| H    | 6.084213  | 0.041965  | -0.684651 |
| C    | 0.960638  | -1.499313 | 0.220596  |
| O    | 0.965204  | -2.690981 | 0.580114  |
| N    | -0.220950 | -0.845524 | 0.034971  |
| C    | -1.350093 | -1.737678 | 0.300624  |
| C    | -2.673300 | -1.061196 | 0.092984  |
| C    | -3.887074 | -1.753503 | 0.192614  |
| C    | -5.082746 | -1.072213 | 0.004763  |
| C    | -5.046399 | 0.296939  | -0.281958 |
| C    | -3.810636 | 0.918928  | -0.367780 |
| N    | -2.647795 | 0.258184  | -0.185246 |
| H    | -3.875587 | -2.816104 | 0.415339  |
| H    | 2.904053  | -2.850031 | -0.643095 |
| H    | -1.297776 | -2.635721 | -0.332856 |
| H    | -1.309999 | -2.131027 | 1.329076  |
| C    | 0.838341  | 1.809755  | -0.461296 |
| C    | 1.902770  | 1.601399  | 0.606494  |
| C    | 1.372001  | 1.458553  | 2.046678  |
| H    | 0.767333  | 0.555166  | 2.160341  |

|   |           |          |           |
|---|-----------|----------|-----------|
| H | 2.208478  | 1.407256 | 2.752625  |
| H | 0.752932  | 2.319901 | 2.329363  |
| C | -0.105561 | 2.979088 | -0.395932 |
| H | -0.074044 | 3.637169 | -1.269938 |
| H | -1.207189 | 2.614849 | -0.422508 |
| H | -0.055545 | 3.563804 | 0.526676  |
| H | 2.552205  | 2.492835 | 0.605347  |
| H | 1.248168  | 1.655099 | -1.463815 |

19

|                              |                    |
|------------------------------|--------------------|
| B3LYP electronic energy:     | -801.67770518 a.u. |
| B3LYP enthalpy:              | -801.417445 a.u.   |
| B3LYP free energy:           | -801.475207 a.u.   |
| M06 SCF energy in solution:  | -801.32637643 a.u. |
| M06 enthalpy in solution:    | -801.066116 a.u.   |
| M06 free energy in solution: | -801.123878 a.u.   |

Cartesian coordinates

| ATOM | X         | Y         | Z         |
|------|-----------|-----------|-----------|
| C    | -2.760070 | 1.134315  | 0.397010  |
| C    | -2.693085 | -0.218998 | 0.031965  |
| C    | -3.870398 | -0.884915 | -0.337589 |
| C    | -5.086921 | -0.207559 | -0.365762 |
| C    | -5.144755 | 1.143118  | -0.011868 |
| C    | -3.980595 | 1.809813  | 0.375065  |
| H    | -1.873922 | 1.666529  | 0.732446  |
| H    | -3.804640 | -1.936117 | -0.597352 |
| H    | -5.991196 | -0.732441 | -0.661639 |
| H    | -6.093833 | 1.672151  | -0.030672 |
| H    | -4.021915 | 2.855551  | 0.667154  |
| C    | -1.425774 | -1.029378 | 0.033289  |
| O    | -1.451725 | -2.257373 | 0.039653  |
| N    | -0.260718 | -0.297628 | 0.010925  |
| H    | -0.306559 | 0.711857  | -0.085414 |
| C    | 1.056393  | -0.759636 | 0.032681  |
| C    | 2.059742  | 0.268718  | -0.026579 |
| C    | 1.444498  | -2.088013 | 0.108557  |
| C    | 3.440880  | -0.092437 | -0.006805 |
| C    | 2.818804  | -2.422867 | 0.128570  |
| H    | 0.686578  | -2.857390 | 0.147953  |
| C    | 2.546844  | 2.515874  | -0.158911 |
| C    | 4.380564  | 0.967934  | -0.069822 |
| C    | 3.803591  | -1.461951 | 0.072757  |
| H    | 3.091980  | -3.472873 | 0.188712  |
| C    | 3.940219  | 2.269845  | -0.146041 |
| H    | 2.175257  | 3.537928  | -0.218618 |
| H    | 5.443102  | 0.736494  | -0.057364 |
| H    | 4.855504  | -1.734595 | 0.087578  |
| H    | 4.636777  | 3.101115  | -0.195668 |
| N    | 1.637437  | 1.561571  | -0.101416 |

20

|                              |                     |
|------------------------------|---------------------|
| B3LYP electronic energy:     | -2162.11711390 a.u. |
| B3LYP enthalpy:              | -2161.490898 a.u.   |
| B3LYP free energy:           | -2161.601629 a.u.   |
| M06 SCF energy in solution:  | -2163.00729417 a.u. |
| M06 enthalpy in solution:    | -2162.381078 a.u.   |
| M06 free energy in solution: | -2162.491809 a.u.   |

Cartesian coordinates

| ATOM | X         | Y         | Z         |
|------|-----------|-----------|-----------|
| H    | 4.747126  | -4.095845 | 0.534989  |
| H    | 2.389961  | -4.633375 | 1.184085  |
| H    | 0.657619  | -2.851509 | 1.025569  |
| Ni   | 0.730914  | 0.089710  | -0.424244 |
| C    | 1.214893  | 3.139561  | 0.348580  |
| C    | -0.028659 | 3.188565  | -0.318732 |
| C    | 2.459815  | 2.436889  | -0.157215 |
| O    | 3.518570  | 3.071892  | -0.189806 |
| N    | 2.348478  | 1.087565  | -0.389928 |
| C    | 3.230089  | -1.085471 | -0.031427 |
| C    | 4.292283  | -2.037483 | 0.038961  |
| C    | 3.963645  | -3.343927 | 0.475626  |
| C    | 2.667027  | -3.645158 | 0.831002  |
| C    | 1.681998  | -2.641633 | 0.736734  |
| N    | 1.940421  | -1.411431 | 0.307856  |
| C    | 0.087038  | 1.232356  | -1.797782 |
| C    | -0.214591 | 2.531922  | -1.645089 |
| P    | -1.347029 | -0.731497 | 0.010801  |
| C    | -1.365068 | -1.225909 | 1.792097  |
| C    | -2.031549 | -2.357906 | 2.284836  |
| C    | -0.654613 | -0.408596 | 2.689642  |
| C    | -1.990629 | -2.664069 | 3.647155  |
| H    | -2.578837 | -3.006552 | 1.608115  |
| C    | -0.626109 | -0.711455 | 4.051377  |
| H    | -0.120242 | 0.463630  | 2.320659  |
| C    | -1.291510 | -1.841490 | 4.532291  |
| H    | -2.507157 | -3.546711 | 4.015049  |
| H    | -0.076253 | -0.068348 | 4.732835  |
| H    | -1.261630 | -2.081996 | 5.591587  |
| C    | -2.796134 | 0.404180  | -0.137479 |
| C    | -3.224804 | 0.790049  | -1.419262 |
| C    | -3.464711 | 0.916635  | 0.982261  |
| C    | -4.303104 | 1.659830  | -1.573487 |
| H    | -2.723122 | 0.404771  | -2.300902 |
| C    | -4.541931 | 1.793009  | 0.824682  |
| H    | -3.150003 | 0.637164  | 1.981855  |
| C    | -4.964178 | 2.166147  | -0.450721 |
| H    | -4.625474 | 1.943653  | -2.571669 |
| H    | -5.049574 | 2.180301  | 1.703990  |
| H    | -5.803588 | 2.845609  | -0.571963 |
| C    | -1.914308 | -2.222470 | -0.919611 |
| C    | -3.258561 | -2.632914 | -0.938175 |
| C    | -0.968747 | -2.968106 | -1.640859 |
| C    | -3.640533 | -3.772928 | -1.645894 |
| H    | -4.008906 | -2.053238 | -0.408693 |
| C    | -1.353173 | -4.108002 | -2.350306 |
| H    | 0.068806  | -2.647925 | -1.653346 |
| C    | -2.688427 | -4.513395 | -2.351542 |
| H    | -4.683191 | -4.079190 | -1.651832 |
| H    | -0.610002 | -4.671811 | -2.907521 |
| H    | -2.989306 | -5.397506 | -2.907118 |
| C    | 3.472608  | 0.273272  | -0.430168 |
| C    | 4.782545  | 0.626771  | -0.759682 |
| H    | 4.991530  | 1.648553  | -1.039002 |
| C    | 5.821615  | -0.328009 | -0.706139 |
| C    | 5.602963  | -1.633810 | -0.319484 |
| H    | 6.824941  | -0.011879 | -0.980885 |
| H    | 6.413414  | -2.356494 | -0.281984 |
| C    | -0.715032 | 3.454651  | -2.744693 |
| H    | -1.716688 | 3.841716  | -2.513674 |
| H    | -0.057056 | 4.327060  | -2.851352 |
| H    | -0.775640 | 2.958937  | -3.716612 |
| C    | 0.117144  | 0.477151  | -3.106391 |



|   |           |           |           |
|---|-----------|-----------|-----------|
| H | -0.539916 | -0.403428 | -3.099342 |
| H | -0.169092 | 1.092830  | -3.968724 |
| H | 1.131374  | 0.102321  | -3.303792 |
| C | 1.385522  | 3.850494  | 1.547517  |
| C | 0.336909  | 4.566521  | 2.119326  |
| H | 0.487671  | 5.099657  | 3.054664  |
| C | -0.899021 | 4.609517  | 1.470253  |
| H | -1.726634 | 5.168996  | 1.899784  |
| C | -1.065896 | 3.942999  | 0.258304  |
| H | 2.365701  | 3.844305  | 2.014510  |
| H | -2.025702 | 3.992086  | -0.248522 |

21

|                              |                     |
|------------------------------|---------------------|
| B3LYP electronic energy:     | -2162.11360825 a.u. |
| B3LYP enthalpy:              | -2161.486780 a.u.   |
| B3LYP free energy:           | -2161.600345 a.u.   |
| M06 SCF energy in solution:  | -2163.00031973 a.u. |
| M06 enthalpy in solution:    | -2162.373491 a.u.   |
| M06 free energy in solution: | -2162.487056 a.u.   |

Cartesian coordinates

| ATOM | X         | Y         | Z         |
|------|-----------|-----------|-----------|
| N    | -2.275328 | -0.922447 | -0.205906 |
| C    | -1.577339 | -1.309858 | 0.999000  |
| C    | -0.842775 | -2.576259 | 0.918653  |
| C    | -0.842753 | -3.352343 | -0.268594 |
| C    | -0.201207 | -3.042200 | 2.079846  |
| C    | 0.468901  | -4.255681 | 2.074467  |
| H    | -0.246041 | -2.423323 | 2.969006  |
| C    | 0.490365  | -5.029282 | 0.903322  |
| H    | 0.970919  | -4.606676 | 2.971673  |
| H    | 1.011139  | -5.983295 | 0.891406  |
| O    | -1.801307 | -0.684448 | 2.047859  |
| C    | -2.177429 | -1.662045 | -1.418824 |
| C    | -1.504066 | -2.849108 | -1.463666 |
| C    | -1.378809 | -3.658208 | -2.734562 |
| H    | -0.329842 | -3.753548 | -3.044877 |
| H    | -1.764710 | -4.675245 | -2.589354 |
| H    | -1.932528 | -3.227930 | -3.569065 |
| C    | -2.837410 | -0.995099 | -2.603601 |
| H    | -2.372912 | -1.305385 | -3.540182 |
| H    | -3.909766 | -1.217268 | -2.669315 |
| H    | -2.730973 | 0.091244  | -2.530621 |
| C    | -0.156202 | -4.587166 | -0.243877 |
| H    | -0.129206 | -5.205749 | -1.134434 |
| C    | -3.286276 | 1.301604  | 0.105770  |
| C    | -4.425166 | 2.122267  | 0.359102  |
| C    | -4.211156 | 3.520767  | 0.470577  |
| C    | -1.870476 | 3.135009  | 0.050140  |
| C    | -2.936528 | 4.019760  | 0.321354  |
| H    | -5.053907 | 4.177087  | 0.671535  |
| H    | -0.862731 | 3.510610  | -0.096089 |
| H    | -2.734436 | 5.083497  | 0.398684  |
| N    | -2.022545 | 1.817043  | -0.055879 |
| Ni   | -0.579257 | 0.450562  | -0.068064 |
| P    | 1.530051  | 0.632610  | -0.063059 |
| C    | 2.363388  | 0.351005  | 1.570753  |
| C    | 3.742470  | 0.118456  | 1.701802  |
| C    | 1.566177  | 0.360114  | 2.726697  |
| C    | 4.313211  | -0.080585 | 2.960131  |
| H    | 4.371852  | 0.085008  | 0.816865  |
| C    | 2.139511  | 0.163572  | 3.985276  |

|   |           |           |           |
|---|-----------|-----------|-----------|
| H | 0.491304  | 0.493315  | 2.635411  |
| C | 3.513353  | -0.053713 | 4.105257  |
| H | 5.382132  | -0.260236 | 3.045565  |
| H | 1.508303  | 0.171381  | 4.870303  |
| H | 3.958572  | -0.210960 | 5.084537  |
| C | 2.058598  | 2.361393  | -0.521778 |
| C | 1.445593  | 2.942379  | -1.647123 |
| C | 2.983059  | 3.129503  | 0.200943  |
| C | 1.761485  | 4.240234  | -2.049106 |
| H | 0.709133  | 2.367255  | -2.204496 |
| C | 3.287708  | 4.436878  | -0.191106 |
| H | 3.468152  | 2.710830  | 1.076640  |
| C | 2.683574  | 4.994955  | -1.317888 |
| H | 1.282651  | 4.665210  | -2.928012 |
| H | 4.002750  | 5.017180  | 0.386976  |
| H | 2.924440  | 6.010126  | -1.622657 |
| C | 2.592038  | -0.389115 | -1.202035 |
| C | 3.571318  | 0.138611  | -2.056466 |
| C | 2.378355  | -1.777836 | -1.203363 |
| C | 4.316263  | -0.700898 | -2.890615 |
| H | 3.757047  | 1.207868  | -2.075879 |
| C | 3.130278  | -2.615723 | -2.025643 |
| H | 1.619188  | -2.202219 | -0.553971 |
| C | 4.100402  | -2.079029 | -2.876967 |
| H | 5.068798  | -0.273242 | -3.548782 |
| H | 2.953818  | -3.688339 | -2.002902 |
| H | 4.681674  | -2.730357 | -3.524773 |
| C | -3.450453 | -0.103624 | 0.007857  |
| C | -4.700552 | -0.670306 | 0.135191  |
| H | -4.806974 | -1.749018 | 0.067807  |
| C | -5.832783 | 0.143817  | 0.369892  |
| C | -5.699338 | 1.510172  | 0.485808  |
| H | -6.809289 | -0.320442 | 0.472041  |
| H | -6.566546 | 2.136633  | 0.678517  |

23C  
 B3LYP electronic energy: -1203.19644595 a.u.  
 B3LYP enthalpy: -1202.828356 a.u.  
 B3LYP free energy: -1202.907213 a.u.  
 M06 SCF energy in solution: -1204.39931281 a.u.  
 M06 enthalpy in solution: -1204.031223 a.u.  
 M06 free energy in solution: -1204.110080 a.u.

Cartesian coordinates

| ATOM | X         | Y         | Z         |
|------|-----------|-----------|-----------|
| H    | -3.922241 | 4.451198  | -0.327043 |
| H    | -4.505367 | 2.367298  | 0.961135  |
| H    | -2.733084 | 0.632247  | 1.274042  |
| Ni   | 0.274966  | 0.356811  | 0.399299  |
| C    | 4.592509  | -1.526324 | -0.030457 |
| C    | 4.236071  | -0.278432 | -0.550823 |
| C    | 2.935612  | 0.185948  | -0.374857 |
| C    | 1.962741  | -0.560963 | 0.313933  |
| C    | 2.330949  | -1.808178 | 0.825729  |
| C    | 3.641127  | -2.285129 | 0.653053  |
| H    | 5.603626  | -1.905050 | -0.158147 |
| H    | 1.614044  | -2.429148 | 1.357623  |
| H    | 3.913777  | -3.258628 | 1.056103  |
| C    | 2.460650  | 1.502944  | -0.899632 |
| O    | 3.136912  | 2.321500  | -1.526879 |
| N    | 1.145909  | 1.659439  | -0.573370 |
| C    | 0.455415  | 2.862639  | -0.960227 |

|   |           |           |           |
|---|-----------|-----------|-----------|
| C | -0.958293 | 2.790321  | -0.450845 |
| C | -1.895304 | 3.806281  | -0.669276 |
| C | -3.183513 | 3.671169  | -0.165544 |
| C | -3.512147 | 2.516490  | 0.550530  |
| C | -2.533522 | 1.548653  | 0.728588  |
| N | -1.284286 | 1.675548  | 0.242566  |
| H | -1.602035 | 4.688336  | -1.230618 |
| H | 4.946698  | 0.342233  | -1.091169 |
| H | 0.946153  | 3.766003  | -0.560294 |
| H | 0.445875  | 2.999875  | -2.054660 |
| C | -0.465486 | -0.754456 | 2.015896  |
| C | -0.887233 | -1.306987 | 0.993094  |
| C | -0.032116 | -0.377175 | 3.366847  |
| C | -1.549409 | -2.134775 | 0.018881  |
| C | -2.775171 | -2.747670 | 0.347097  |
| C | -0.990541 | -2.352620 | -1.254377 |
| C | -3.422910 | -3.560109 | -0.580083 |
| H | -3.206661 | -2.584086 | 1.330409  |
| C | -1.647033 | -3.167570 | -2.174223 |
| H | -0.041968 | -1.887074 | -1.501270 |
| C | -2.862538 | -3.771188 | -1.842903 |
| H | -4.366719 | -4.029548 | -0.316390 |
| H | -1.205780 | -3.331923 | -3.153197 |
| H | -3.371070 | -4.404487 | -2.564557 |
| H | -0.495338 | -1.033627 | 4.114107  |
| H | 1.056643  | -0.467030 | 3.449585  |
| H | -0.301402 | 0.658576  | 3.602233  |

24C

|                              |                     |
|------------------------------|---------------------|
| B3LYP electronic energy:     | -1321.13470004 a.u. |
| B3LYP enthalpy:              | -1320.677555 a.u.   |
| B3LYP free energy:           | -1320.764756 a.u.   |
| M06 SCF energy in solution:  | -1322.27854586 a.u. |
| M06 enthalpy in solution:    | -1321.821401 a.u.   |
| M06 free energy in solution: | -1321.908602 a.u.   |

Cartesian coordinates

| ATOM | X         | Y         | Z         |
|------|-----------|-----------|-----------|
| H    | 3.800481  | -4.586488 | -0.720560 |
| H    | 4.524021  | -2.374760 | 0.242303  |
| H    | 2.790175  | -0.608722 | 0.587988  |
| Ni   | -0.305064 | -0.393183 | 0.040054  |
| C    | -4.561099 | 1.599365  | -0.517849 |
| C    | -4.275335 | 0.273325  | -0.855828 |
| C    | -2.989680 | -0.220015 | -0.650282 |
| C    | -1.963479 | 0.572085  | -0.105339 |
| C    | -2.260112 | 1.898719  | 0.220043  |
| C    | -3.553721 | 2.406347  | 0.013770  |
| H    | -5.559217 | 2.001939  | -0.671860 |
| H    | -1.500028 | 2.555883  | 0.634510  |
| H    | -3.769740 | 3.441232  | 0.272336  |
| C    | -2.585182 | -1.613311 | -1.009758 |
| O    | -3.315343 | -2.476828 | -1.501783 |
| N    | -1.263690 | -1.778798 | -0.716472 |
| C    | -0.627664 | -3.038698 | -1.004420 |
| C    | 0.832787  | -2.928750 | -0.662172 |
| C    | 1.742160  | -3.969948 | -0.878924 |
| C    | 3.081541  | -3.789004 | -0.554998 |
| C    | 3.488009  | -2.563673 | -0.019093 |
| C    | 2.531024  | -1.577339 | 0.174777  |
| N    | 1.231559  | -1.750044 | -0.132255 |

|   |           |           |           |
|---|-----------|-----------|-----------|
| H | 1.388684  | -4.905140 | -1.302744 |
| H | -5.028368 | -0.385925 | -1.280747 |
| H | -1.078366 | -3.870190 | -0.435803 |
| H | -0.738403 | -3.320903 | -2.064430 |
| C | 0.545669  | 0.813813  | 1.536341  |
| C | 0.903424  | 1.277708  | 0.443283  |
| C | 0.331258  | 0.599133  | 2.996369  |
| C | 1.170714  | -0.610637 | 3.469933  |
| H | 2.239599  | -0.449534 | 3.290388  |
| H | 1.025125  | -0.760500 | 4.545943  |
| H | 0.867720  | -1.525787 | 2.951809  |
| C | -1.157848 | 0.344510  | 3.316672  |
| H | -1.277366 | 0.223674  | 4.399767  |
| H | -1.785436 | 1.175712  | 2.984923  |
| H | -1.519795 | -0.561507 | 2.822056  |
| C | 0.808973  | 1.878999  | 3.725347  |
| H | 1.865252  | 2.083230  | 3.517998  |
| H | 0.222886  | 2.749587  | 3.413960  |
| H | 0.690943  | 1.753683  | 4.808124  |
| C | 1.524495  | 2.026352  | -0.619858 |
| C | 2.759889  | 2.663286  | -0.384383 |
| C | 0.926152  | 2.139971  | -1.888735 |
| C | 3.377240  | 3.395277  | -1.395433 |
| H | 3.223255  | 2.581435  | 0.594694  |
| C | 1.551989  | 2.875617  | -2.893210 |
| H | -0.029275 | 1.657926  | -2.067933 |
| C | 2.776895  | 3.502688  | -2.652884 |
| H | 4.328495  | 3.883325  | -1.201134 |
| H | 1.078941  | 2.959046  | -3.867633 |
| H | 3.261260  | 4.073493  | -3.440313 |

25

|                              |                     |
|------------------------------|---------------------|
| B3LYP electronic energy:     | -1013.88643269 a.u. |
| B3LYP enthalpy:              | -1013.530110 a.u.   |
| B3LYP free energy:           | -1013.602178 a.u.   |
| M06 SCF energy in solution:  | -1015.17871973 a.u. |
| M06 enthalpy in solution:    | -1014.822397 a.u.   |
| M06 free energy in solution: | -1014.894465 a.u.   |

Cartesian coordinates

| ATOM | X         | Y         | Z         |
|------|-----------|-----------|-----------|
| H    | 5.602196  | -2.098754 | -0.720923 |
| H    | 5.559354  | 0.407112  | -0.976976 |
| H    | 3.409922  | 1.599098  | -0.600705 |
| Ni   | 0.454810  | 0.630127  | 0.197159  |
| C    | -4.921200 | -0.716890 | 0.350323  |
| C    | -3.708934 | -1.304566 | 0.709516  |
| C    | -2.544250 | -1.045960 | -0.025344 |
| C    | -2.626284 | -0.223282 | -1.157188 |
| C    | -3.843895 | 0.347031  | -1.532080 |
| C    | -4.992487 | 0.111578  | -0.772850 |
| H    | -5.813688 | -0.913475 | 0.939253  |
| H    | -3.897422 | 0.972585  | -2.420037 |
| H    | -5.939474 | 0.561246  | -1.061150 |
| C    | -1.283921 | -1.770178 | 0.375909  |
| O    | -1.379300 | -2.915514 | 0.840677  |
| N    | -0.073653 | -1.171339 | 0.148260  |
| C    | 1.036600  | -2.091135 | 0.367233  |
| C    | 2.335781  | -1.453542 | -0.027734 |
| C    | 3.508768  | -2.193828 | -0.220511 |
| C    | 4.684919  | -1.538430 | -0.563553 |
| C    | 4.666784  | -0.147887 | -0.707844 |

|   |           |           |           |
|---|-----------|-----------|-----------|
| C | 3.468058  | 0.519180  | -0.500223 |
| N | 2.325318  | -0.111208 | -0.168720 |
| H | 3.481847  | -3.272653 | -0.102079 |
| H | -3.644689 | -1.979470 | 1.557106  |
| H | 1.102225  | -2.407291 | 1.422744  |
| H | 0.889943  | -3.025481 | -0.192542 |
| C | 1.034858  | 2.518200  | 0.927582  |
| C | 0.713889  | 2.632033  | -0.413298 |
| H | -0.907462 | 0.965625  | 0.549146  |
| H | -1.733895 | -0.044777 | -1.748205 |
| H | 2.074456  | 2.298596  | 1.171458  |
| H | 1.521555  | 2.492447  | -1.132741 |
| C | 0.214022  | 2.997845  | 2.096837  |
| H | 0.265490  | 2.286033  | 2.927596  |
| H | 0.613168  | 3.955838  | 2.461735  |
| H | -0.837889 | 3.139412  | 1.841670  |
| C | -0.524474 | 3.263227  | -0.996046 |
| H | -0.296290 | 4.286631  | -1.328831 |
| H | -0.872314 | 2.705704  | -1.871756 |
| H | -1.348371 | 3.309598  | -0.281773 |

26

|                              |                     |
|------------------------------|---------------------|
| B3LYP electronic energy:     | -2050.19052546 a.u. |
| B3LYP enthalpy:              | -2049.537110 a.u.   |
| B3LYP free energy:           | -2049.649670 a.u.   |
| M06 SCF energy in solution:  | -2051.13928256 a.u. |
| M06 enthalpy in solution:    | -2050.485867 a.u.   |
| M06 free energy in solution: | -2050.598427 a.u.   |

#### Cartesian coordinates

| ATOM | X         | Y         | Z         |
|------|-----------|-----------|-----------|
| H    | 6.578979  | -1.711209 | 1.196328  |
| H    | 6.288224  | -0.847889 | -1.153867 |
| H    | 4.007911  | -0.249952 | -1.921829 |
| Ni   | 1.081232  | -0.207360 | -0.432810 |
| C    | -2.590087 | -4.437646 | -1.041297 |
| C    | -1.776954 | -4.024255 | 0.012629  |
| C    | -0.657634 | -3.211838 | -0.221294 |
| C    | -0.343168 | -2.864929 | -1.541693 |
| C    | -1.143207 | -3.296472 | -2.602971 |
| C    | -2.275458 | -4.074477 | -2.354471 |
| H    | -3.462440 | -5.055573 | -0.842827 |
| H    | -0.874803 | -3.035572 | -3.624236 |
| H    | -2.900496 | -4.409165 | -3.178667 |
| C    | 0.214738  | -2.838332 | 0.957165  |
| O    | 0.276640  | -3.632803 | 1.913531  |
| N    | 0.879464  | -1.663983 | 0.872897  |
| C    | 1.921697  | -1.464204 | 1.859903  |
| C    | 3.210528  | -1.250159 | 1.098497  |
| C    | 4.464948  | -1.585817 | 1.612576  |
| C    | 5.597753  | -1.439201 | 0.817091  |
| C    | 5.442598  | -0.960274 | -0.483215 |
| C    | 4.165082  | -0.624929 | -0.919637 |
| N    | 3.068540  | -0.747543 | -0.152363 |
| H    | 4.533800  | -1.981727 | 2.621144  |
| H    | -1.979009 | -4.332163 | 1.033898  |
| H    | 1.717968  | -0.581058 | 2.491179  |
| H    | 2.001800  | -2.326890 | 2.530870  |
| C    | 1.328901  | 1.072644  | -1.939037 |
| C    | 1.526053  | 0.195645  | -3.188403 |
| H    | 0.553348  | -2.282494 | -1.738429 |

|   |           |           |           |
|---|-----------|-----------|-----------|
| P | -0.770244 | 0.894840  | 0.245409  |
| C | -2.298017 | 0.837788  | -0.789752 |
| C | -3.531973 | 1.288212  | -0.287247 |
| C | -2.243024 | 0.329666  | -2.094113 |
| C | -4.677595 | 1.243122  | -1.080480 |
| H | -3.597783 | 1.665676  | 0.728854  |
| C | -3.392510 | 0.282158  | -2.886321 |
| H | -1.304777 | -0.043577 | -2.486035 |
| C | -4.609548 | 0.740517  | -2.382906 |
| H | -5.624746 | 1.593530  | -0.679052 |
| H | -3.334654 | -0.122517 | -3.892907 |
| H | -5.504670 | 0.699572  | -2.997820 |
| C | -1.430206 | 0.432137  | 1.914367  |
| C | -1.297108 | 1.244400  | 3.049631  |
| C | -2.085499 | -0.804195 | 2.043272  |
| C | -1.796207 | 0.823499  | 4.285940  |
| H | -0.815672 | 2.213022  | 2.980049  |
| C | -2.582491 | -1.220209 | 3.276056  |
| H | -2.210514 | -1.447221 | 1.178905  |
| C | -2.435828 | -0.409201 | 4.404124  |
| H | -1.684392 | 1.467843  | 5.154168  |
| H | -3.075934 | -2.184585 | 3.355319  |
| H | -2.819172 | -0.737023 | 5.366676  |
| C | -0.395678 | 2.697605  | 0.424664  |
| C | -1.160381 | 3.707188  | -0.175629 |
| C | 0.730964  | 3.066511  | 1.180994  |
| C | -0.815728 | 5.051783  | -0.011272 |
| H | -2.027899 | 3.449725  | -0.773466 |
| C | 1.063929  | 4.409199  | 1.358801  |
| H | 1.352574  | 2.296782  | 1.631810  |
| C | 0.290871  | 5.406919  | 0.759827  |
| H | -1.418180 | 5.820837  | -0.487419 |
| H | 1.933386  | 4.674431  | 1.954303  |
| H | 0.554200  | 6.453131  | 0.889464  |
| H | 0.387044  | 1.618892  | -2.086107 |
| C | 2.419112  | 2.145570  | -1.771145 |
| H | 3.419463  | 1.707168  | -1.872123 |
| H | 2.377492  | 2.561243  | -0.757858 |
| H | 1.716598  | 0.800572  | -4.089591 |
| H | 2.367421  | -0.503226 | -3.096860 |
| H | 0.640086  | -0.413649 | -3.405551 |
| C | 2.299871  | 3.315954  | -2.765464 |
| H | 3.100947  | 4.050401  | -2.612611 |
| H | 2.358923  | 2.977140  | -3.806902 |
| H | 1.342516  | 3.835837  | -2.638384 |

27

|                              |                     |
|------------------------------|---------------------|
| B3LYP electronic energy:     | -1013.90307810 a.u. |
| B3LYP enthalpy:              | -1013.544772 a.u.   |
| B3LYP free energy:           | -1013.616736 a.u.   |
| M06 SCF energy in solution:  | -1015.19393082 a.u. |
| M06 enthalpy in solution:    | -1014.835625 a.u.   |
| M06 free energy in solution: | -1014.907589 a.u.   |

Cartesian coordinates

| ATOM | X         | Y         | Z         |
|------|-----------|-----------|-----------|
| H    | 5.773207  | -1.755303 | -0.310434 |
| H    | 5.572531  | 0.754124  | -0.417631 |
| H    | 3.304956  | 1.770558  | -0.245047 |
| Ni   | 0.524559  | 0.604426  | 0.099905  |
| C    | -4.799879 | -0.697080 | 0.307340  |
| C    | -3.607317 | -1.358009 | 0.597242  |

|   |           |           |           |
|---|-----------|-----------|-----------|
| C | -2.450986 | -1.109116 | -0.155623 |
| C | -2.526868 | -0.219839 | -1.237335 |
| C | -3.726647 | 0.429038  | -1.541668 |
| C | -4.863052 | 0.200600  | -0.763126 |
| H | -5.685362 | -0.888967 | 0.908297  |
| H | -3.776422 | 1.103179  | -2.393571 |
| H | -5.796202 | 0.706877  | -0.997166 |
| C | -1.199386 | -1.887362 | 0.176042  |
| O | -1.309468 | -3.066432 | 0.550797  |
| N | -0.010901 | -1.251089 | 0.015193  |
| C | 1.122405  | -2.135270 | 0.213633  |
| C | 2.406690  | -1.385409 | 0.009256  |
| C | 3.648353  | -2.024453 | -0.080493 |
| C | 4.804084  | -1.270112 | -0.237364 |
| C | 4.698368  | 0.122627  | -0.299443 |
| C | 3.440179  | 0.697538  | -0.206460 |
| N | 2.315921  | -0.035909 | -0.061765 |
| H | 3.687605  | -3.107990 | -0.025682 |
| H | 1.127264  | -2.575093 | 1.226529  |
| H | 1.087325  | -3.003454 | -0.462372 |
| C | 0.713078  | 2.508349  | 0.229019  |
| C | -0.722102 | 2.326464  | 0.610496  |
| H | -1.036029 | 1.208633  | 0.430981  |
| C | 1.002659  | 3.266314  | -1.056846 |
| H | 0.820221  | 4.347011  | -0.944870 |
| H | 2.046581  | 3.155054  | -1.375243 |
| H | 0.373407  | 2.915299  | -1.884070 |
| C | -1.105132 | 2.610021  | 2.066467  |
| H | -0.412793 | 2.115227  | 2.755722  |
| H | -1.064222 | 3.687960  | 2.259136  |
| H | -2.117583 | 2.259486  | 2.292063  |
| H | -1.646670 | -0.058788 | -1.853764 |
| H | -3.550776 | -2.085397 | 1.401115  |
| H | 1.352591  | 2.815001  | 1.064076  |
| H | -1.413354 | 2.807292  | -0.092591 |

28

|                              |                     |
|------------------------------|---------------------|
| B3LYP electronic energy:     | -1013.88520129 a.u. |
| B3LYP enthalpy:              | -1013.528902 a.u.   |
| B3LYP free energy:           | -1013.600892 a.u.   |
| M06 SCF energy in solution:  | -1015.17745386 a.u. |
| M06 enthalpy in solution:    | -1014.821155 a.u.   |
| M06 free energy in solution: | -1014.893145 a.u.   |

Cartesian coordinates

| ATOM | X         | Y         | Z         |
|------|-----------|-----------|-----------|
| H    | 5.330240  | -2.381303 | -1.006464 |
| H    | 5.416295  | 0.119107  | -1.314862 |
| H    | 3.386026  | 1.444667  | -0.804861 |
| Ni   | 0.398559  | 0.652096  | 0.241550  |
| C    | -5.035247 | -0.470876 | 0.387845  |
| C    | -3.849691 | -1.118158 | 0.733301  |
| C    | -2.672798 | -0.889173 | 0.007866  |
| C    | -2.717148 | -0.032990 | -1.101204 |
| C    | -3.908442 | 0.598928  | -1.461889 |
| C    | -5.068238 | 0.390909  | -0.711836 |
| H    | -5.936981 | -0.645980 | 0.969420  |
| H    | -3.932642 | 1.250710  | -2.332068 |
| H    | -5.994568 | 0.888011  | -0.989154 |
| C    | -1.443712 | -1.671173 | 0.398740  |
| O    | -1.586870 | -2.812757 | 0.860781  |
| N    | -0.210462 | -1.124029 | 0.166804  |

|   |           |           |           |
|---|-----------|-----------|-----------|
| C | 0.863753  | -2.082242 | 0.389681  |
| C | 2.169129  | -1.519787 | -0.090831 |
| C | 3.276907  | -2.334914 | -0.353377 |
| C | 4.463528  | -1.762077 | -0.793133 |
| C | 4.516518  | -0.376548 | -0.965707 |
| C | 3.379759  | 0.367240  | -0.681593 |
| N | 2.227239  | -0.179153 | -0.248081 |
| H | 3.189342  | -3.408147 | -0.215379 |
| H | -3.815542 | -1.817379 | 1.562667  |
| H | 0.960969  | -2.350581 | 1.456535  |
| H | 0.653049  | -3.033279 | -0.117809 |
| C | 0.806633  | 2.519301  | 1.170027  |
| C | 0.832664  | 2.669311  | -0.201715 |
| H | -0.946819 | 0.998355  | 0.638067  |
| H | -1.816950 | 0.123988  | -1.686272 |
| H | -0.115406 | 2.773708  | 1.688634  |
| H | 1.800357  | 2.646703  | -0.701860 |
| C | 2.015516  | 2.380518  | 2.060059  |
| H | 2.915848  | 2.102135  | 1.505721  |
| H | 2.211641  | 3.338273  | 2.563680  |
| H | 1.851429  | 1.634070  | 2.845406  |
| C | -0.294967 | 3.244422  | -1.022538 |
| H | -0.432409 | 2.695385  | -1.960724 |
| H | -1.241711 | 3.223091  | -0.476349 |
| H | -0.069269 | 4.287970  | -1.287227 |

cis-butene

|                              |                    |
|------------------------------|--------------------|
| B3LYP electronic energy:     | -157.22172609 a.u. |
| B3LYP enthalpy:              | -157.106612 a.u.   |
| B3LYP free energy:           | -157.140812 a.u.   |
| M06 SCF energy in solution:  | -157.13228102 a.u. |
| M06 enthalpy in solution:    | -157.017167 a.u.   |
| M06 free energy in solution: | -157.051367 a.u.   |

Cartesian coordinates

| ATOM | X         | Y         | Z         |
|------|-----------|-----------|-----------|
| C    | 0.669537  | 0.664357  | 0.000123  |
| H    | 1.169853  | 1.633540  | -0.000127 |
| C    | -0.669243 | 0.664309  | 0.000039  |
| H    | -1.169538 | 1.633529  | -0.000234 |
| C    | 1.593282  | -0.521993 | -0.000033 |
| H    | 2.250856  | -0.505519 | -0.880032 |
| H    | 2.250602  | -0.506256 | 0.880205  |
| H    | 1.060095  | -1.476754 | -0.000453 |
| C    | -1.593449 | -0.521804 | 0.000005  |
| H    | -2.251152 | -0.505307 | 0.879890  |
| H    | -2.250540 | -0.505499 | -0.880382 |
| H    | -1.060936 | -1.476952 | 0.000333  |

trans-butene

|                              |                    |
|------------------------------|--------------------|
| B3LYP electronic energy:     | -157.22387050 a.u. |
| B3LYP enthalpy:              | -157.108916 a.u.   |
| B3LYP free energy:           | -157.142690 a.u.   |
| M06 SCF energy in solution:  | -157.13401404 a.u. |
| M06 enthalpy in solution:    | -157.019060 a.u.   |
| M06 free energy in solution: | -157.052834 a.u.   |

Cartesian coordinates

| ATOM | X        | Y        | Z         |
|------|----------|----------|-----------|
| C    | 0.538159 | 0.395577 | -0.000039 |



|   |           |           |           |
|---|-----------|-----------|-----------|
| C | -0.538138 | -0.395547 | -0.000008 |
| H | -0.392393 | -1.477879 | -0.000072 |
| C | -1.963781 | 0.079247  | 0.000018  |
| H | -2.508479 | -0.290062 | -0.879875 |
| H | -2.507879 | -0.288084 | 0.881102  |
| H | -2.022879 | 1.173243  | -0.001168 |
| C | 1.963779  | -0.079251 | 0.000047  |
| H | 2.508127  | 0.288738  | 0.880647  |
| H | 2.022745  | -1.173270 | -0.000330 |
| H | 2.508220  | 0.289237  | -0.880371 |
| H | 0.392424  | 1.477926  | -0.000044 |

cod  
 B3LYP electronic energy: -312.02446496 a.u.  
 B3LYP enthalpy: -311.834900 a.u.  
 B3LYP free energy: -311.874794 a.u.  
 M06 SCF energy in solution: -311.86167603 a.u.  
 M06 enthalpy in solution: -311.672111 a.u.  
 M06 free energy in solution: -311.712005 a.u.

#### Cartesian coordinates

| ATOM | X         | Y         | Z         |
|------|-----------|-----------|-----------|
| C    | 0.008110  | -1.704646 | -0.218327 |
| C    | 1.083058  | -1.107451 | 0.665571  |
| C    | 1.923422  | -0.010896 | -0.024155 |
| C    | 1.215178  | 1.236011  | -0.495444 |
| H    | 0.291642  | -2.634803 | -0.711991 |
| H    | 1.771464  | -1.909771 | 0.959658  |
| H    | 2.741191  | 0.283647  | 0.653636  |
| H    | 1.821932  | 1.841492  | -1.171141 |
| C    | -1.215201 | -1.236052 | -0.495388 |
| C    | -1.923414 | 0.010885  | -0.024175 |
| C    | -1.083040 | 1.107501  | 0.665572  |
| C    | -0.008103 | 1.704610  | -0.218337 |
| H    | -1.821999 | -1.841574 | -1.171014 |
| H    | -2.741289 | -0.283542 | 0.653558  |
| H    | -1.771498 | 1.909816  | 0.959532  |
| H    | -0.291585 | 2.634840  | -0.711897 |
| H    | 2.425435  | -0.455887 | -0.896261 |
| H    | 0.665797  | -0.724098 | 1.600149  |
| H    | -0.665858 | 0.724206  | 1.600210  |
| H    | -2.425295 | 0.455902  | -0.896344 |

Ni(cod)2  
 B3LYP electronic energy: -793.39808640 a.u.  
 B3LYP enthalpy: -793.015649 a.u.  
 B3LYP free energy: -793.075395 a.u.  
 M06 SCF energy in solution: -794.75361191 a.u.  
 M06 enthalpy in solution: -794.371175 a.u.  
 M06 free energy in solution: -794.430921 a.u.

#### Cartesian coordinates

| ATOM | X        | Y         | Z         |
|------|----------|-----------|-----------|
| C    | 1.537926 | 0.470607  | 1.481211  |
| C    | 2.636584 | -0.583207 | 1.420138  |
| C    | 2.245574 | -1.837050 | 0.602206  |
| C    | 1.394386 | -1.538005 | -0.615237 |
| H    | 1.004176 | 0.534137  | 2.426473  |
| H    | 2.886554 | -0.894887 | 2.441858  |
| H    | 3.154458 | -2.393615 | 0.317668  |

|    |           |           |           |
|----|-----------|-----------|-----------|
| H  | 0.780744  | -2.369788 | -0.957744 |
| C  | 1.394541  | 1.538311  | 0.615105  |
| C  | 2.245001  | 1.837395  | -0.602808 |
| C  | 2.635669  | 0.583687  | -1.421076 |
| C  | 1.537278  | -0.470451 | -1.481579 |
| H  | 0.780830  | 2.369860  | 0.958059  |
| H  | 3.153993  | 2.394028  | -0.318777 |
| H  | 2.884838  | 0.895531  | -2.442946 |
| H  | 1.003055  | -0.534152 | -2.426557 |
| H  | 1.673467  | -2.514249 | 1.249344  |
| H  | 3.553423  | -0.140761 | 1.016951  |
| H  | 3.552911  | 0.141418  | -1.018603 |
| H  | 1.672508  | 2.514614  | -1.249596 |
| C  | -1.537362 | -0.470438 | 1.481372  |
| C  | -2.635631 | 0.583842  | 1.421032  |
| C  | -2.245276 | 1.837339  | 0.602269  |
| C  | -1.394987 | 1.538166  | -0.615733 |
| H  | -1.003673 | -0.534562 | 2.426645  |
| H  | -2.884216 | 0.896004  | 2.442943  |
| H  | -3.154434 | 2.393717  | 0.318272  |
| H  | -0.780697 | 2.369420  | -0.958299 |
| C  | -1.394564 | -1.538235 | 0.615237  |
| C  | -2.245031 | -1.837310 | -0.602674 |
| C  | -2.636582 | -0.583518 | -1.420289 |
| C  | -1.538285 | 0.470534  | -1.481702 |
| H  | -0.781405 | -2.370106 | 0.958399  |
| H  | -3.153611 | -2.394705 | -0.318817 |
| H  | -2.886848 | -0.895184 | -2.441949 |
| H  | -1.003782 | 0.533502  | -2.426559 |
| H  | -1.672727 | 2.514799  | 1.248735  |
| H  | -3.553180 | 0.141625  | 1.019152  |
| H  | -3.553358 | -0.141271 | -1.016742 |
| H  | -1.672127 | -2.513784 | -1.249902 |
| Ni | 0.000131  | -0.000414 | 0.000612  |

pph3  
 B3LYP electronic energy: -1036.28167341 a.u.  
 B3LYP enthalpy: -1035.990465 a.u.  
 B3LYP free energy: -1036.053750 a.u.  
 M06 SCF energy in solution: -1035.91870448 a.u.  
 M06 enthalpy in solution: -1035.627496 a.u.  
 M06 free energy in solution: -1035.690781 a.u.

#### Cartesian coordinates

| ATOM | X         | Y         | Z         |
|------|-----------|-----------|-----------|
| P    | -0.000292 | -0.000205 | -1.207261 |
| C    | -1.651129 | -0.252142 | -0.403091 |
| C    | -2.760887 | 0.334847  | -1.035175 |
| C    | -1.864490 | -1.006304 | 0.761282  |
| C    | -4.044384 | 0.191016  | -0.507993 |
| H    | -2.616572 | 0.905051  | -1.950174 |
| C    | -3.151204 | -1.160145 | 1.283050  |
| H    | -1.023296 | -1.478066 | 1.260285  |
| C    | -4.242948 | -0.560021 | 0.652940  |
| H    | -4.889911 | 0.655575  | -1.008843 |
| H    | -3.299353 | -1.749757 | 2.184400  |
| H    | -5.243284 | -0.682075 | 1.060130  |
| C    | 1.043483  | -1.303970 | -0.403035 |
| C    | 1.807372  | -1.110071 | 0.758391  |
| C    | 1.086387  | -2.560144 | -1.032079 |
| C    | 2.584250  | -2.147202 | 1.280270  |
| H    | 1.799325  | -0.144674 | 1.255489  |

|   |           |           |           |
|---|-----------|-----------|-----------|
| C | 1.853008  | -3.599513 | -0.504862 |
| H | 0.517436  | -2.721508 | -1.944962 |
| C | 2.606574  | -3.394331 | 0.653241  |
| H | 3.172149  | -1.979093 | 2.179212  |
| H | 1.870543  | -4.565119 | -1.003692 |
| H | 3.212451  | -4.199615 | 1.060333  |
| C | 0.607441  | 1.555594  | -0.403981 |
| C | 1.676961  | 2.218056  | -1.030901 |
| C | 0.054739  | 2.123319  | 0.754681  |
| C | 2.193938  | 3.401684  | -0.503895 |
| H | 2.103777  | 1.804103  | -1.941747 |
| C | 0.564673  | 3.314745  | 1.276152  |
| H | -0.779624 | 1.635588  | 1.249725  |
| C | 1.636616  | 3.954745  | 0.651396  |
| H | 3.023930  | 3.897495  | -1.000775 |
| H | 0.122966  | 3.742104  | 2.172957  |
| H | 2.031442  | 4.882066  | 1.058227  |

TS1  
 B3LYP electronic energy: -2929.20985284 a.u.  
 B3LYP enthalpy: -2928.386361 a.u.  
 B3LYP free energy: -2928.527456 a.u.  
 M06 SCF energy in solution: -2929.89551772 a.u.  
 M06 enthalpy in solution: -2929.072026 a.u.  
 M06 free energy in solution: -2929.213121 a.u.  
 Imaginary frequency: -1121.0759 cm<sup>-1</sup>

#### Cartesian coordinates

| ATOM | X         | Y         | Z         |
|------|-----------|-----------|-----------|
| Ni   | -0.203715 | 0.043557  | -0.626059 |
| N    | 0.356118  | -1.112507 | -2.312515 |
| H    | 0.008816  | -1.411280 | -0.858719 |
| C    | -0.393706 | -0.405325 | -3.350355 |
| H    | -0.035792 | -0.718014 | -4.337100 |
| H    | -1.450149 | -0.691573 | -3.260533 |
| C    | -0.329833 | 1.105812  | -3.244911 |
| C    | -0.272681 | 1.934714  | -4.367173 |
| C    | -0.295751 | 3.318620  | -4.199567 |
| H    | -0.205263 | 1.492130  | -5.355989 |
| C    | -0.416506 | 2.951391  | -1.835213 |
| C    | -0.375847 | 3.838505  | -2.907796 |
| H    | -0.248518 | 3.978508  | -5.061631 |
| H    | -0.468201 | 3.306653  | -0.811430 |
| H    | -0.395841 | 4.908465  | -2.726391 |
| N    | -0.389449 | 1.616540  | -1.993137 |
| C    | 1.612385  | -1.515720 | -2.667357 |
| O    | 2.180651  | -1.159763 | -3.709467 |
| C    | 2.295239  | -2.518957 | -1.768429 |
| C    | 1.592294  | -3.520805 | -1.083841 |
| C    | 3.696672  | -2.520311 | -1.717529 |
| C    | 2.275056  | -4.493278 | -0.349307 |
| H    | 0.509251  | -3.553686 | -1.145170 |
| C    | 4.378602  | -3.477529 | -0.967979 |
| H    | 4.235359  | -1.763016 | -2.276652 |
| C    | 3.669965  | -4.469094 | -0.282531 |
| H    | 1.716559  | -5.272248 | 0.163606  |
| H    | 5.464550  | -3.456843 | -0.925225 |
| H    | 4.202763  | -5.224649 | 0.289662  |
| P    | 1.542925  | 0.747369  | 0.721115  |
| C    | 2.011533  | -0.192263 | 2.252973  |
| C    | 1.954671  | 0.345546  | 3.547018  |

|   |           |           |           |
|---|-----------|-----------|-----------|
| C | 2.415347  | -1.530687 | 2.097895  |
| C | 2.289574  | -0.434687 | 4.657710  |
| H | 1.650830  | 1.376700  | 3.695193  |
| C | 2.759796  | -2.303620 | 3.206295  |
| H | 2.461448  | -1.972601 | 1.107350  |
| C | 2.695073  | -1.759302 | 4.492518  |
| H | 2.237664  | 0.000082  | 5.652821  |
| H | 3.077262  | -3.332618 | 3.059589  |
| H | 2.960609  | -2.362483 | 5.356950  |
| C | 3.202586  | 0.951060  | -0.087533 |
| C | 3.244893  | 1.162559  | -1.473499 |
| C | 4.412435  | 0.921669  | 0.626685  |
| C | 4.463181  | 1.346649  | -2.131162 |
| H | 2.325073  | 1.155308  | -2.046772 |
| C | 5.629928  | 1.105092  | -0.030510 |
| H | 4.404221  | 0.750202  | 1.698767  |
| C | 5.658250  | 1.319881  | -1.411019 |
| H | 4.472675  | 1.489454  | -3.207969 |
| H | 6.557209  | 1.076893  | 0.536397  |
| H | 6.607857  | 1.455973  | -1.922273 |
| C | 1.231690  | 2.456651  | 1.387024  |
| C | 2.189990  | 3.482494  | 1.388320  |
| C | -0.050014 | 2.739937  | 1.889971  |
| C | 1.874050  | 4.751983  | 1.879515  |
| H | 3.186650  | 3.295253  | 1.002944  |
| C | -0.362331 | 4.004509  | 2.391716  |
| H | -0.813258 | 1.968308  | 1.878086  |
| C | 0.599964  | 5.017176  | 2.384213  |
| H | 2.629052  | 5.534174  | 1.867291  |
| H | -1.361830 | 4.195775  | 2.772784  |
| H | 0.357383  | 6.005989  | 2.764975  |
| P | -2.239483 | -0.464562 | 0.152828  |
| C | -3.421011 | -1.254756 | -1.051867 |
| C | -4.763802 | -0.876169 | -1.204450 |
| C | -2.935686 | -2.324259 | -1.825002 |
| C | -5.596674 | -1.548418 | -2.103547 |
| H | -5.166521 | -0.053509 | -0.622361 |
| C | -3.770658 | -3.001296 | -2.714146 |
| H | -1.892095 | -2.615820 | -1.743354 |
| C | -5.105369 | -2.614448 | -2.857469 |
| H | -6.633267 | -1.237950 | -2.208931 |
| H | -3.374926 | -3.826204 | -3.300988 |
| H | -5.754988 | -3.137389 | -3.554346 |
| C | -3.197854 | 1.016006  | 0.729613  |
| C | -3.567966 | 1.212685  | 2.068954  |
| C | -3.479101 | 2.036901  | -0.197200 |
| C | -4.205334 | 2.391554  | 2.468517  |
| H | -3.363024 | 0.443227  | 2.806066  |
| C | -4.126674 | 3.206223  | 0.199373  |
| H | -3.193202 | 1.910973  | -1.237365 |
| C | -4.490318 | 3.390054  | 1.536648  |
| H | -4.486282 | 2.521219  | 3.510713  |
| H | -4.344289 | 3.976708  | -0.535976 |
| H | -4.992639 | 4.302516  | 1.846870  |
| C | -2.403488 | -1.644270 | 1.576181  |
| C | -1.253302 | -2.000089 | 2.291541  |
| C | -3.636880 | -2.200690 | 1.958217  |
| C | -1.329391 | -2.882462 | 3.372883  |
| H | -0.294632 | -1.591137 | 1.994497  |
| C | -3.713168 | -3.082114 | 3.035928  |
| H | -4.539270 | -1.952079 | 1.407259  |
| C | -2.558765 | -3.423945 | 3.747372  |
| H | -0.423343 | -3.141900 | 3.913522  |
| H | -4.673302 | -3.506831 | 3.318046  |

H            -2.620466    -4.113569    4.585455

TS2  
B3LYP electronic energy:            -1012.63427171 a.u.  
B3LYP enthalpy:                    -1012.303376 a.u.  
B3LYP free energy:                  -1012.374601 a.u.  
M06 SCF energy in solution:        -1013.93428652 a.u.  
M06 enthalpy in solution:          -1013.603391 a.u.  
M06 free energy in solution:        -1013.674616 a.u.  
Imaginary frequency:               -92.9440 cm<sup>-1</sup>

Cartesian coordinates

| ATOM | X         | Y         | Z         |
|------|-----------|-----------|-----------|
| H    | -5.373841 | -2.246692 | 1.047822  |
| H    | -5.291096 | 0.214531  | 1.573681  |
| H    | -3.223458 | 1.480514  | 0.995650  |
| Ni   | -0.466310 | 0.655316  | -0.311805 |
| C    | 4.939483  | -0.523813 | -0.233506 |
| C    | 3.771278  | -1.135950 | -0.687157 |
| C    | 2.560617  | -0.958859 | -0.004900 |
| C    | 2.551259  | -0.192144 | 1.169056  |
| C    | 3.725067  | 0.401289  | 1.638554  |
| C    | 4.920518  | 0.247172  | 0.931938  |
| H    | 5.868779  | -0.658130 | -0.781666 |
| H    | 3.708990  | 0.976064  | 2.561951  |
| H    | 5.833581  | 0.713133  | 1.294259  |
| C    | 1.345387  | -1.701711 | -0.507230 |
| O    | 1.500233  | -2.812282 | -1.038182 |
| N    | 0.121690  | -1.145812 | -0.284957 |
| C    | -0.978698 | -2.042965 | -0.615130 |
| C    | -2.247563 | -1.477704 | -0.044514 |
| C    | -3.375928 | -2.253663 | 0.238768  |
| C    | -4.492684 | -1.656181 | 0.813083  |
| C    | -4.453687 | -0.290154 | 1.103315  |
| C    | -3.305374 | 0.421255  | 0.781547  |
| N    | -2.231036 | -0.149053 | 0.204582  |
| H    | -3.358108 | -3.316915 | 0.020832  |
| H    | -1.095095 | -2.178694 | -1.705503 |
| H    | -0.797338 | -3.051537 | -0.221339 |
| C    | -1.138721 | 2.550090  | -0.598066 |
| C    | 0.055333  | 2.652870  | -0.252984 |
| H    | 0.870750  | 0.967293  | -0.788973 |
| C    | -2.453069 | 3.047277  | -1.064926 |
| H    | -2.300111 | 3.771236  | -1.874376 |
| H    | -3.092394 | 2.247200  | -1.448169 |
| H    | -2.995381 | 3.563756  | -0.263072 |
| C    | 1.345824  | 3.284433  | 0.086952  |
| H    | 2.034416  | 3.230753  | -0.764141 |
| H    | 1.184414  | 4.338288  | 0.344026  |
| H    | 1.832167  | 2.783812  | 0.928287  |
| H    | 1.622122  | -0.079025 | 1.719010  |
| H    | 3.777596  | -1.769583 | -1.568456 |

TS3  
B3LYP electronic energy:            -1012.64500659 a.u.  
B3LYP enthalpy:                    -1012.314419 a.u.  
B3LYP free energy:                  -1012.383966 a.u.  
M06 SCF energy in solution:        -1013.94111571 a.u.  
M06 enthalpy in solution:          -1013.610528 a.u.  
M06 free energy in solution:        -1013.680075 a.u.

Imaginary frequency: -1229.2779 cm-1

Cartesian coordinates

| ATOM | X         | Y         | Z         |
|------|-----------|-----------|-----------|
| H    | 5.661997  | -1.455104 | -0.255343 |
| H    | 5.121621  | 1.003972  | -0.237729 |
| H    | 2.717092  | 1.690344  | -0.123927 |
| Ni   | 0.090691  | 0.172675  | 0.015896  |
| C    | -4.712936 | -0.491783 | -0.176842 |
| C    | -3.720363 | -1.461804 | -0.027029 |
| C    | -2.376632 | -1.100513 | 0.054853  |
| C    | -1.999388 | 0.262079  | 0.000259  |
| C    | -3.004921 | 1.222841  | -0.173210 |
| C    | -4.352078 | 0.851068  | -0.262270 |
| H    | -5.758067 | -0.784064 | -0.237610 |
| H    | -2.744747 | 2.277718  | -0.226649 |
| H    | -5.112363 | 1.617347  | -0.391863 |
| C    | -1.331936 | -2.188254 | 0.090097  |
| O    | -1.596570 | -3.385451 | 0.239951  |
| N    | -0.102188 | -1.662511 | -0.099484 |
| C    | 1.073999  | -2.487759 | -0.056867 |
| C    | 2.268236  | -1.567856 | -0.091394 |
| C    | 3.586897  | -2.026415 | -0.156490 |
| C    | 4.632771  | -1.111470 | -0.204050 |
| C    | 4.338492  | 0.254540  | -0.192626 |
| C    | 3.008957  | 0.646213  | -0.125151 |
| N    | 1.994454  | -0.239100 | -0.067997 |
| H    | 3.775378  | -3.095514 | -0.173387 |
| H    | 1.109600  | -3.118034 | 0.847815  |
| H    | 1.129419  | -3.189733 | -0.905587 |
| C    | 0.163258  | 2.131468  | 0.388040  |
| C    | 0.093371  | 2.998633  | -0.640362 |
| H    | -0.296537 | 2.622093  | -1.588731 |
| C    | 0.591564  | 2.473065  | 1.797087  |
| H    | 0.768854  | 3.544322  | 1.951305  |
| H    | -0.174629 | 2.159125  | 2.517480  |
| H    | 1.509601  | 1.939700  | 2.078259  |
| C    | 0.488203  | 4.453181  | -0.672892 |
| H    | -0.368766 | 5.082384  | -0.949865 |
| H    | 0.876431  | 4.813308  | 0.283428  |
| H    | 1.258371  | 4.626874  | -1.437088 |
| H    | -3.955130 | -2.522102 | 0.011287  |
| H    | -1.015747 | 1.203947  | 0.338973  |

TS4

B3LYP electronic energy: -856.61535223 a.u.  
B3LYP enthalpy: -856.382052 a.u.  
B3LYP free energy: -856.438216 a.u.  
M06 SCF energy in solution: -857.99555580 a.u.  
M06 enthalpy in solution: -857.762256 a.u.  
M06 free energy in solution: -857.818420 a.u.  
Imaginary frequency: -1224.9880 cm-1

Cartesian coordinates

| ATOM | X         | Y         | Z         |
|------|-----------|-----------|-----------|
| H    | 5.772271  | 0.409564  | -0.069370 |
| H    | 5.068460  | -2.004833 | 0.041198  |
| H    | 2.626379  | -2.529153 | 0.088575  |
| Ni   | 0.124094  | -0.829117 | 0.041322  |
| C    | -4.626095 | 0.021668  | -0.069798 |
| C    | -3.596391 | 0.960802  | 0.013755  |
| C    | -2.265530 | 0.551920  | 0.065485  |

|   |           |           |           |
|---|-----------|-----------|-----------|
| C | -1.937032 | -0.823833 | 0.043778  |
| C | -2.979899 | -1.754161 | -0.061813 |
| C | -4.315304 | -1.335533 | -0.117448 |
| H | -5.661979 | 0.348379  | -0.107517 |
| H | -2.765062 | -2.820929 | -0.095810 |
| H | -5.106373 | -2.077171 | -0.194608 |
| C | -1.173302 | 1.591262  | 0.054751  |
| O | -1.375045 | 2.805360  | 0.139545  |
| N | 0.033189  | 0.996055  | -0.088214 |
| C | 1.258257  | 1.748446  | -0.082394 |
| C | 2.391107  | 0.753578  | -0.050924 |
| C | 3.738816  | 1.120420  | -0.080632 |
| C | 4.721068  | 0.136974  | -0.047501 |
| C | 4.336213  | -1.205087 | 0.013907  |
| C | 2.982492  | -1.507106 | 0.040262  |
| N | 2.027391  | -0.553690 | 0.008132  |
| H | 4.000536  | 2.172909  | -0.129446 |
| H | -3.793579 | 2.029388  | 0.024544  |
| H | 1.360556  | 2.394714  | -0.970191 |
| H | 1.328251  | 2.425054  | 0.785507  |
| H | -0.952301 | -1.848737 | 0.322026  |
| H | 0.018099  | -2.379443 | 0.263720  |

TS5  
 B3LYP electronic energy: -1011.42443657 a.u.  
 B3LYP enthalpy: -1011.114184 a.u.  
 B3LYP free energy: -1011.181129 a.u.  
 M06 SCF energy in solution: -1012.72479346 a.u.  
 M06 enthalpy in solution: -1012.414541 a.u.  
 M06 free energy in solution: -1012.481486 a.u.  
 Imaginary frequency: -256.4272 cm<sup>-1</sup>

#### Cartesian coordinates

| ATOM | X         | Y         | Z         |
|------|-----------|-----------|-----------|
| H    | 5.831588  | -0.934674 | -0.483834 |
| H    | 5.103207  | 1.385474  | -1.137399 |
| H    | 2.680241  | 1.960456  | -0.962871 |
| Ni   | 0.173672  | 0.422273  | -0.077378 |
| C    | -4.279585 | -0.791727 | -1.070823 |
| C    | -3.383755 | -1.573188 | -0.332541 |
| C    | -2.146740 | -1.060351 | 0.044327  |
| C    | -1.796967 | 0.276075  | -0.277111 |
| C    | -2.675943 | 1.026265  | -1.069667 |
| C    | -3.909084 | 0.492487  | -1.468144 |
| H    | -5.245901 | -1.196174 | -1.361050 |
| H    | -2.420183 | 2.046140  | -1.340370 |
| H    | -4.582506 | 1.093869  | -2.073873 |
| C    | -1.059788 | -1.995713 | 0.524737  |
| O    | -1.262375 | -3.117392 | 1.001338  |
| N    | 0.130903  | -1.430191 | 0.239982  |
| C    | 1.378004  | -2.090146 | 0.509160  |
| C    | 2.483242  | -1.158228 | 0.067602  |
| C    | 3.824295  | -1.547534 | 0.005460  |
| C    | 4.787252  | -0.641402 | -0.425363 |
| C    | 4.388753  | 0.647226  | -0.788689 |
| C    | 3.042843  | 0.974784  | -0.695768 |
| N    | 2.107607  | 0.100281  | -0.275656 |
| H    | 4.095140  | -2.560337 | 0.287935  |
| H    | -3.599741 | -2.609066 | -0.083258 |
| H    | 1.511510  | -2.331157 | 1.579508  |
| H    | 1.470114  | -3.051470 | -0.021643 |
| C    | -0.052005 | 2.279021  | 0.337275  |

|   |           |          |           |
|---|-----------|----------|-----------|
| C | -1.069319 | 1.703211 | 0.885187  |
| C | -2.061092 | 1.795383 | 1.994623  |
| H | -1.802499 | 2.652403 | 2.629523  |
| H | -3.083112 | 1.925508 | 1.623142  |
| H | -2.044873 | 0.891396 | 2.613000  |
| C | 0.690598  | 3.566758 | 0.405874  |
| H | 0.771875  | 4.033254 | -0.584739 |
| H | 0.203124  | 4.289282 | 1.074531  |
| H | 1.714366  | 3.412438 | 0.770132  |

TS6

|                              |                            |
|------------------------------|----------------------------|
| B3LYP electronic energy:     | -2047.75970320 a.u.        |
| B3LYP enthalpy:              | -2047.154604 a.u.          |
| B3LYP free energy:           | -2047.261985 a.u.          |
| M06 SCF energy in solution:  | -2048.70940455 a.u.        |
| M06 enthalpy in solution:    | -2048.104305 a.u.          |
| M06 free energy in solution: | -2048.211686 a.u.          |
| Imaginary frequency:         | -308.3586 cm <sup>-1</sup> |

Cartesian coordinates

| ATOM | X         | Y         | Z         |
|------|-----------|-----------|-----------|
| N    | -2.126993 | 1.415105  | -1.068062 |
| C    | -3.038538 | 1.294729  | -0.020329 |
| C    | -3.370735 | -0.075916 | 0.435567  |
| C    | -3.138306 | -1.253181 | -0.341805 |
| C    | -4.089547 | -0.162715 | 1.643400  |
| C    | -4.576011 | -1.372204 | 2.113034  |
| H    | -4.267945 | 0.761256  | 2.183783  |
| C    | -4.380815 | -2.531427 | 1.344300  |
| H    | -5.116868 | -1.419987 | 3.054344  |
| H    | -4.767067 | -3.487055 | 1.691930  |
| O    | -3.560693 | 2.303507  | 0.478663  |
| C    | -1.535053 | -0.182432 | -1.841986 |
| C    | -2.426040 | -1.207432 | -1.598733 |
| C    | -2.694537 | -2.284333 | -2.634211 |
| H    | -2.137960 | -3.213285 | -2.437575 |
| H    | -3.758891 | -2.549624 | -2.669442 |
| H    | -2.408431 | -1.959122 | -3.638396 |
| C    | -0.936846 | 0.068048  | -3.210639 |
| H    | -0.253622 | -0.750851 | -3.467392 |
| H    | -1.694765 | 0.134981  | -4.004058 |
| H    | -0.345396 | 0.989544  | -3.238177 |
| Ni   | -0.431588 | 0.739032  | -0.572314 |
| C    | -3.695443 | -2.466588 | 0.142106  |
| H    | -3.556393 | -3.374583 | -0.437311 |
| C    | -1.923379 | 2.782441  | -1.542989 |
| H    | -2.876284 | 3.319208  | -1.566057 |
| H    | -1.526026 | 2.739327  | -2.565049 |
| C    | -0.927467 | 3.517475  | -0.661500 |
| C    | -0.931868 | 4.904229  | -0.502329 |
| C    | 0.040816  | 5.500979  | 0.296353  |
| H    | -1.698857 | 5.499259  | -0.988406 |
| C    | 0.940051  | 3.320190  | 0.702139  |
| C    | 0.999734  | 4.694204  | 0.910953  |
| H    | 0.047652  | 6.577692  | 0.442227  |
| H    | 1.666545  | 2.651411  | 1.153602  |
| H    | 1.775601  | 5.115292  | 1.542263  |
| N    | -0.000575 | 2.738654  | -0.061097 |
| P    | 1.260816  | -0.550361 | 0.055662  |
| C    | 1.231999  | -0.910519 | 1.868184  |
| C    | 1.927171  | -1.989899 | 2.438869  |
| C    | 0.476096  | -0.073731 | 2.703982  |



|   |           |           |           |
|---|-----------|-----------|-----------|
| C | 1.878621  | -2.214790 | 3.815142  |
| H | 2.497997  | -2.662542 | 1.805218  |
| C | 0.429516  | -0.299482 | 4.081129  |
| H | -0.094139 | 0.743322  | 2.270484  |
| C | 1.132161  | -1.368557 | 4.638974  |
| H | 2.418627  | -3.055386 | 4.243113  |
| H | -0.167235 | 0.352418  | 4.713217  |
| H | 1.090065  | -1.549489 | 5.709749  |
| C | 2.919941  | 0.222525  | -0.231377 |
| C | 3.966007  | 0.210570  | 0.703596  |
| C | 3.120308  | 0.882695  | -1.456615 |
| C | 5.181753  | 0.837313  | 0.417458  |
| H | 3.833262  | -0.284941 | 1.660034  |
| C | 4.338983  | 1.495987  | -1.747278 |
| H | 2.313460  | 0.917257  | -2.184416 |
| C | 5.372997  | 1.477343  | -0.807921 |
| H | 5.980159  | 0.822150  | 1.154874  |
| H | 4.477641  | 1.995818  | -2.702360 |
| H | 6.319955  | 1.962612  | -1.028802 |
| C | 1.433054  | -2.235585 | -0.680733 |
| C | 2.582751  | -2.676468 | -1.350782 |
| C | 0.332994  | -3.104325 | -0.569084 |
| C | 2.634286  | -3.962154 | -1.897055 |
| H | 3.442604  | -2.021302 | -1.446990 |
| C | 0.393833  | -4.390556 | -1.104707 |
| H | -0.570288 | -2.772961 | -0.065703 |
| C | 1.542968  | -4.822034 | -1.773297 |
| H | 3.532463  | -4.290170 | -2.414010 |
| H | -0.459537 | -5.055627 | -1.002054 |
| H | 1.585683  | -5.822844 | -2.194868 |

TS7  
 B3LYP electronic energy: -1011.42933525 a.u.  
 B3LYP enthalpy: -1011.117711 a.u.  
 B3LYP free energy: -1011.182773 a.u.  
 M06 SCF energy in solution: -1012.72151978 a.u.  
 M06 enthalpy in solution: -1012.409896 a.u.  
 M06 free energy in solution: -1012.474958 a.u.  
 Imaginary frequency: -331.7593 cm<sup>-1</sup>

#### Cartesian coordinates

| ATOM | X         | Y         | Z         |
|------|-----------|-----------|-----------|
| N    | 0.165869  | 0.315969  | 0.949524  |
| C    | -0.407278 | -0.954272 | 1.005959  |
| C    | -1.712798 | -1.130825 | 0.330980  |
| C    | -2.530697 | -0.058859 | -0.140432 |
| C    | -2.166118 | -2.458826 | 0.224207  |
| C    | -3.394925 | -2.761886 | -0.339633 |
| H    | -1.516335 | -3.236745 | 0.610601  |
| C    | -4.216383 | -1.716682 | -0.790923 |
| H    | -3.721841 | -3.794687 | -0.423009 |
| H    | -5.185505 | -1.936274 | -1.232570 |
| O    | 0.168725  | -1.880021 | 1.594011  |
| C    | -0.823386 | 1.694060  | 0.227261  |
| C    | -2.147714 | 1.330897  | 0.017104  |
| C    | -3.248205 | 2.376350  | 0.037033  |
| H    | -3.680001 | 2.536776  | -0.960708 |
| H    | -4.074927 | 2.076282  | 0.694679  |
| H    | -2.884264 | 3.345595  | 0.383946  |
| C    | -0.415970 | 3.032084  | 0.814585  |
| H    | -0.682136 | 3.844490  | 0.128956  |
| H    | -0.899779 | 3.234964  | 1.779859  |

|    |           |           |           |
|----|-----------|-----------|-----------|
| H  | 0.666288  | 3.096814  | 0.960090  |
| Ni | 0.503232  | 0.925242  | -0.806748 |
| C  | -3.798053 | -0.401094 | -0.679725 |
| H  | -4.450250 | 0.389022  | -1.037136 |
| C  | 1.505646  | 0.402028  | 1.544635  |
| H  | 1.541924  | -0.193691 | 2.460902  |
| H  | 1.707197  | 1.448325  | 1.802005  |
| C  | 2.577731  | -0.080220 | 0.568943  |
| C  | 3.764950  | -0.670387 | 0.999081  |
| C  | 4.721071  | -1.052884 | 0.059573  |
| H  | 3.926111  | -0.836770 | 2.059539  |
| C  | 3.253218  | -0.249232 | -1.652568 |
| C  | 4.461742  | -0.837170 | -1.294049 |
| H  | 5.648705  | -1.519718 | 0.378300  |
| H  | 3.001583  | -0.068991 | -2.693138 |
| H  | 5.173777  | -1.125022 | -2.060661 |
| N  | 2.327297  | 0.126106  | -0.750520 |

TS8  
 B3LYP electronic energy: -1012.65217490 a.u.  
 B3LYP enthalpy: -1012.317919 a.u.  
 B3LYP free energy: -1012.384019 a.u.  
 M06 SCF energy in solution: -1013.95263027 a.u.  
 M06 enthalpy in solution: -1013.618374 a.u.  
 M06 free energy in solution: -1013.684474 a.u.  
 Imaginary frequency: -276.9975 cm<sup>-1</sup>

#### Cartesian coordinates

| ATOM | X         | Y         | Z         |
|------|-----------|-----------|-----------|
| H    | 5.678537  | -1.220915 | -0.702974 |
| H    | 5.043345  | 1.082443  | -1.500111 |
| H    | 2.667308  | 1.806951  | -1.256913 |
| Ni   | 0.141233  | 0.470216  | -0.204043 |
| C    | -4.314231 | -0.720531 | -1.152015 |
| C    | -3.472635 | -1.425662 | -0.289812 |
| C    | -2.259953 | -0.876621 | 0.128290  |
| C    | -1.902358 | 0.441587  | -0.253058 |
| C    | -2.729400 | 1.106493  | -1.172833 |
| C    | -3.917391 | 0.531092  | -1.628987 |
| H    | -5.254793 | -1.157063 | -1.477831 |
| H    | -2.475647 | 2.114795  | -1.495397 |
| H    | -4.544587 | 1.075056  | -2.330714 |
| C    | -1.201310 | -1.806505 | 0.683487  |
| O    | -1.437355 | -2.834381 | 1.327640  |
| N    | -0.005995 | -1.368052 | 0.237543  |
| C    | 1.216235  | -2.062983 | 0.534943  |
| C    | 2.351111  | -1.216473 | 0.003074  |
| C    | 3.665646  | -1.682802 | -0.086650 |
| C    | 4.655328  | -0.865289 | -0.621670 |
| C    | 4.309097  | 0.413767  | -1.063383 |
| C    | 2.989351  | 0.824364  | -0.934204 |
| N    | 2.029509  | 0.038358  | -0.407217 |
| H    | 3.893352  | -2.688368 | 0.253767  |
| H    | -3.701700 | -2.440138 | 0.026262  |
| H    | 1.357470  | -2.235811 | 1.617170  |
| H    | 1.261227  | -3.062049 | 0.071602  |
| C    | 0.048965  | 2.371792  | 0.190387  |
| C    | -1.143664 | 1.813236  | 0.861920  |
| H    | -0.212235 | 3.014370  | -0.657077 |
| H    | -2.050434 | 2.386690  | 0.696380  |
| C    | 1.182873  | 2.949581  | 1.022967  |

|   |           |          |          |
|---|-----------|----------|----------|
| H | 2.042942  | 3.211716 | 0.396622 |
| H | 0.877536  | 3.875977 | 1.535244 |
| H | 1.539599  | 2.257115 | 1.792665 |
| C | -1.070895 | 1.369243 | 2.315816 |
| H | -0.196526 | 0.750507 | 2.532170 |
| H | -1.023702 | 2.260240 | 2.956850 |
| H | -1.962584 | 0.799621 | 2.592461 |

TS9  
 B3LYP electronic energy: -2162.08635190 a.u.  
 B3LYP enthalpy: -2161.462036 a.u.  
 B3LYP free energy: -2161.571927 a.u.  
 M06 SCF energy in solution: -2162.97609107 a.u.  
 M06 enthalpy in solution: -2162.351775 a.u.  
 M06 free energy in solution: -2162.461666 a.u.  
 Imaginary frequency: -323.7549 cm<sup>-1</sup>

#### Cartesian coordinates

| ATOM | X         | Y         | Z         |
|------|-----------|-----------|-----------|
| N    | 2.264530  | 0.953882  | -0.210088 |
| C    | 2.377242  | 1.975559  | 0.750807  |
| C    | 0.544974  | 3.345322  | -0.417247 |
| O    | 3.305206  | 1.983809  | 1.563069  |
| C    | 0.983178  | 1.208713  | -1.517834 |
| C    | 0.583230  | 2.524410  | -1.606318 |
| Ni   | 0.645016  | -0.038769 | -0.084759 |
| C    | 3.116162  | -1.303511 | 0.128523  |
| C    | 4.168252  | -2.266567 | 0.066221  |
| C    | 3.867750  | -3.585342 | 0.494201  |
| C    | 1.625843  | -2.864923 | 0.979850  |
| C    | 2.602975  | -3.884412 | 0.948612  |
| H    | 4.643005  | -4.346831 | 0.456407  |
| H    | 0.622769  | -3.075850 | 1.340006  |
| H    | 2.343843  | -4.882951 | 1.286019  |
| N    | 1.860270  | -1.620658 | 0.587080  |
| P    | -1.484443 | -0.635505 | 0.003898  |
| C    | -2.132496 | -0.507939 | 1.730083  |
| C    | -3.495056 | -0.337215 | 2.023429  |
| C    | -1.213601 | -0.580412 | 2.789642  |
| C    | -3.927918 | -0.253251 | 3.347880  |
| H    | -4.216953 | -0.259168 | 1.215739  |
| C    | -1.648865 | -0.498548 | 4.113379  |
| H    | -0.153300 | -0.684418 | 2.573242  |
| C    | -3.006669 | -0.335830 | 4.394616  |
| H    | -4.984925 | -0.117368 | 3.561452  |
| H    | -0.925058 | -0.549024 | 4.922300  |
| H    | -3.345208 | -0.263966 | 5.424799  |
| C    | -1.793298 | -2.402475 | -0.460281 |
| C    | -2.638205 | -3.261833 | 0.258286  |
| C    | -1.121773 | -2.906358 | -1.587893 |
| C    | -2.809436 | -4.589208 | -0.143541 |
| H    | -3.163108 | -2.897607 | 1.135879  |
| C    | -1.303801 | -4.227740 | -1.996391 |
| H    | -0.450178 | -2.259226 | -2.146189 |
| C    | -2.146625 | -5.074338 | -1.271986 |
| H    | -3.464457 | -5.242732 | 0.426846  |
| H    | -0.780730 | -4.598051 | -2.874178 |
| H    | -2.282592 | -6.106567 | -1.583525 |
| C    | -2.740905 | 0.291644  | -0.980044 |
| C    | -3.674353 | -0.326131 | -1.824651 |
| C    | -2.738831 | 1.693223  | -0.875791 |
| C    | -4.589836 | 0.441951  | -2.549478 |

|   |           |           |           |
|---|-----------|-----------|-----------|
| H | -3.692222 | -1.407233 | -1.918665 |
| C | -3.662145 | 2.455220  | -1.591339 |
| H | -2.014774 | 2.190214  | -0.237697 |
| C | -4.587720 | 1.832218  | -2.433122 |
| H | -5.306797 | -0.050593 | -3.201336 |
| H | -3.653505 | 3.537470  | -1.493023 |
| H | -5.301909 | 2.428096  | -2.995351 |
| C | 3.346564  | 0.038548  | -0.297827 |
| C | 4.599795  | 0.389470  | -0.769205 |
| H | 4.778283  | 1.414818  | -1.075691 |
| C | 5.639574  | -0.563607 | -0.831848 |
| C | 5.436509  | -1.866960 | -0.427075 |
| H | 6.612871  | -0.258823 | -1.206186 |
| H | 6.236310  | -2.600378 | -0.486724 |
| C | 0.176029  | 3.135767  | -2.933621 |
| H | 0.569168  | 4.154580  | -3.045137 |
| H | 0.543886  | 2.550325  | -3.780356 |
| H | -0.916828 | 3.198130  | -3.044942 |
| C | 1.300556  | 0.365139  | -2.735360 |
| H | 0.376257  | 0.128686  | -3.276975 |
| H | 1.979658  | 0.872325  | -3.434827 |
| H | 1.766880  | -0.585783 | -2.460058 |
| C | 1.341247  | 3.036978  | 0.726966  |
| C | 1.297536  | 3.871969  | 1.859524  |
| C | 0.481823  | 4.991733  | 1.902650  |
| H | 0.448589  | 5.614239  | 2.792566  |
| C | -0.282560 | 5.323675  | 0.772499  |
| H | -0.915106 | 6.208499  | 0.783602  |
| C | -0.237265 | 4.528709  | -0.361932 |
| H | 1.943824  | 3.616855  | 2.692863  |
| H | -0.834017 | 4.805529  | -1.225858 |

TS10A

|                              |                            |
|------------------------------|----------------------------|
| B3LYP electronic energy:     | -1203.16320932 a.u.        |
| B3LYP enthalpy:              | -1202.796526 a.u.          |
| B3LYP free energy:           | -1202.871715 a.u.          |
| M06 SCF energy in solution:  | -1204.36529071 a.u.        |
| M06 enthalpy in solution:    | -1203.998607 a.u.          |
| M06 free energy in solution: | -1204.073796 a.u.          |
| Imaginary frequency:         | -237.8356 cm <sup>-1</sup> |

Cartesian coordinates

| ATOM | X         | Y         | Z         |
|------|-----------|-----------|-----------|
| H    | -2.529588 | 5.273066  | -0.425132 |
| H    | -3.727502 | 3.163136  | -1.100836 |
| H    | -2.488998 | 1.001918  | -0.975695 |
| Ni   | 0.363494  | 0.216588  | -0.147611 |
| C    | 4.316256  | -2.219710 | -0.977448 |
| C    | 4.246348  | -1.040182 | -0.227456 |
| C    | 3.013330  | -0.486829 | 0.101104  |
| C    | 1.811837  | -1.136377 | -0.282158 |
| C    | 1.895749  | -2.280479 | -1.087943 |
| C    | 3.142623  | -2.816301 | -1.436931 |
| H    | 5.282312  | -2.649714 | -1.229092 |
| H    | 0.987407  | -2.784075 | -1.404337 |
| H    | 3.187686  | -3.711238 | -2.052452 |
| C    | 2.939269  | 0.942929  | 0.588477  |
| O    | 3.877106  | 1.550033  | 1.115365  |
| N    | 1.732984  | 1.439285  | 0.245754  |
| C    | 1.365410  | 2.803785  | 0.505530  |
| C    | -0.068078 | 2.978473  | 0.060586  |
| C    | -0.703485 | 4.222637  | 0.028517  |

|   |           |           |           |
|---|-----------|-----------|-----------|
| C | -2.026456 | 4.310829  | -0.391118 |
| C | -2.694928 | 3.144229  | -0.768608 |
| C | -2.010964 | 1.937312  | -0.708797 |
| N | -0.727006 | 1.850374  | -0.307969 |
| H | -0.150753 | 5.107676  | 0.328860  |
| H | 5.140302  | -0.496638 | 0.067656  |
| H | 1.451654  | 3.071385  | 1.573809  |
| H | 2.008981  | 3.521095  | -0.029327 |
| C | -0.853390 | -1.238080 | 0.176903  |
| C | 0.237965  | -1.568532 | 0.792855  |
| C | 0.778487  | -2.378794 | 1.923226  |
| C | -2.274505 | -1.548525 | 0.149967  |
| C | -2.954424 | -1.667867 | -1.078051 |
| C | -3.010853 | -1.724805 | 1.338798  |
| C | -4.314646 | -1.973971 | -1.116377 |
| H | -2.396636 | -1.531585 | -2.000986 |
| C | -4.372249 | -2.021251 | 1.296473  |
| H | -2.506463 | -1.618309 | 2.294993  |
| C | -5.030020 | -2.150462 | 0.070253  |
| H | -4.816666 | -2.073510 | -2.075337 |
| H | -4.921617 | -2.153226 | 2.225149  |
| H | -6.090806 | -2.383792 | 0.040564  |
| H | 1.382824  | -1.759753 | 2.595713  |
| H | -0.059537 | -2.796577 | 2.494131  |
| H | 1.411205  | -3.200382 | 1.571213  |

#### TS10B

|                              |                            |
|------------------------------|----------------------------|
| B3LYP electronic energy:     | -1203.15837362 a.u.        |
| B3LYP enthalpy:              | -1202.791891 a.u.          |
| B3LYP free energy:           | -1202.866893 a.u.          |
| M06 SCF energy in solution:  | -1204.36260487 a.u.        |
| M06 enthalpy in solution:    | -1203.996122 a.u.          |
| M06 free energy in solution: | -1204.071124 a.u.          |
| Imaginary frequency:         | -244.9127 cm <sup>-1</sup> |

#### Cartesian coordinates

| ATOM | X         | Y         | Z         |
|------|-----------|-----------|-----------|
| H    | -6.441282 | -0.893005 | 0.729714  |
| H    | -5.343948 | -2.415596 | -0.948984 |
| H    | -2.921634 | -2.078435 | -1.449146 |
| Ni   | -0.779333 | -0.123505 | -0.440888 |
| C    | 2.572812  | 2.938780  | -1.717745 |
| C    | 1.774722  | 3.056042  | -0.574727 |
| C    | 0.935323  | 2.015477  | -0.190374 |
| C    | 0.912633  | 0.806067  | -0.930824 |
| C    | 1.667761  | 0.724635  | -2.107851 |
| C    | 2.490290  | 1.788513  | -2.500786 |
| H    | 3.229862  | 3.753583  | -2.010588 |
| H    | 1.653409  | -0.186082 | -2.697565 |
| H    | 3.079707  | 1.700975  | -3.409987 |
| C    | -0.153912 | 2.271818  | 0.826903  |
| O    | -0.136648 | 3.193272  | 1.650151  |
| N    | -1.152026 | 1.396134  | 0.598844  |
| C    | -2.386578 | 1.421160  | 1.331854  |
| C    | -3.276449 | 0.350872  | 0.741833  |
| C    | -4.625760 | 0.214107  | 1.079259  |
| C    | -5.389751 | -0.782014 | 0.480733  |
| C    | -4.785980 | -1.629822 | -0.450778 |
| C    | -3.439186 | -1.448798 | -0.735120 |
| N    | -2.695014 | -0.487396 | -0.153925 |
| H    | -5.063195 | 0.897568  | 1.800683  |
| H    | 1.744226  | 3.971877  | 0.010105  |

|   |           |           |           |
|---|-----------|-----------|-----------|
| H | -2.248530 | 1.224603  | 2.410719  |
| H | -2.891255 | 2.398780  | 1.272971  |
| C | 0.059762  | -1.774083 | -0.896031 |
| C | 0.997197  | -1.075591 | -0.330322 |
| C | -0.236142 | -3.197472 | -1.210889 |
| C | 2.253173  | -1.227065 | 0.404639  |
| C | 3.155462  | -2.226905 | -0.003228 |
| C | 2.563272  | -0.455637 | 1.536779  |
| C | 4.328579  | -2.457852 | 0.713904  |
| H | 2.934922  | -2.813934 | -0.890135 |
| C | 3.737926  | -0.690146 | 2.248546  |
| H | 1.881266  | 0.325679  | 1.856113  |
| C | 4.624719  | -1.690881 | 1.842439  |
| H | 5.015655  | -3.232825 | 0.384028  |
| H | 3.961747  | -0.086064 | 3.123667  |
| H | 5.541896  | -1.866937 | 2.397867  |
| H | -0.348788 | -3.347558 | -2.293107 |
| H | 0.557448  | -3.870634 | -0.860000 |
| H | -1.176960 | -3.518440 | -0.746434 |

TS11A

|                              |                            |
|------------------------------|----------------------------|
| B3LYP electronic energy:     | -1321.09886709 a.u.        |
| B3LYP enthalpy:              | -1320.643225 a.u.          |
| B3LYP free energy:           | -1320.726153 a.u.          |
| M06 SCF energy in solution:  | -1322.24610984 a.u.        |
| M06 enthalpy in solution:    | -1321.790468 a.u.          |
| M06 free energy in solution: | -1321.873396 a.u.          |
| Imaginary frequency:         | -227.0653 cm <sup>-1</sup> |

Cartesian coordinates

| ATOM | X         | Y         | Z         |
|------|-----------|-----------|-----------|
| H    | -2.863804 | 5.518467  | -0.136996 |
| H    | -3.957446 | 3.454336  | -1.077973 |
| H    | -2.663330 | 1.319474  | -1.075291 |
| Ni   | 0.197359  | 0.540837  | -0.233858 |
| C    | 4.166084  | -1.347404 | -1.872660 |
| C    | 4.113339  | -0.327011 | -0.915457 |
| C    | 2.897211  | 0.050609  | -0.355452 |
| C    | 1.703111  | -0.632174 | -0.705725 |
| C    | 1.760615  | -1.603941 | -1.713929 |
| C    | 2.985618  | -1.954532 | -2.298316 |
| H    | 5.118475  | -1.638089 | -2.308405 |
| H    | 0.856432  | -2.121581 | -2.016615 |
| H    | 3.010868  | -2.719769 | -3.070067 |
| C    | 2.784680  | 1.375053  | 0.368915  |
| O    | 3.741149  | 1.987506  | 0.854988  |
| N    | 1.505654  | 1.787812  | 0.279323  |
| C    | 1.067991  | 3.079044  | 0.730728  |
| C    | -0.359224 | 3.254068  | 0.260885  |
| C    | -1.031475 | 4.477686  | 0.315040  |
| C    | -2.334539 | 4.570107  | -0.163695 |
| C    | -2.945839 | 3.428681  | -0.686778 |
| C    | -2.229309 | 2.238797  | -0.698342 |
| N    | -0.968420 | 2.146623  | -0.233620 |
| H    | -0.520624 | 5.346316  | 0.719377  |
| H    | 4.997932  | 0.238246  | -0.632885 |
| H    | 1.101301  | 3.183014  | 1.830977  |
| H    | 1.695569  | 3.893890  | 0.337448  |
| C    | -0.895850 | -1.044321 | -0.068448 |
| C    | 0.252286  | -1.360146 | 0.443610  |
| C    | 0.854456  | -2.195801 | 1.563617  |
| C    | 1.891898  | -3.224648 | 1.068868  |

|   |           |           |           |
|---|-----------|-----------|-----------|
| H | 1.468559  | -3.878614 | 0.298742  |
| H | 2.781953  | -2.742676 | 0.657967  |
| H | 2.204853  | -3.852854 | 1.911426  |
| C | -0.324150 | -2.954685 | 2.218763  |
| H | -1.077321 | -2.262092 | 2.607648  |
| H | -0.816034 | -3.623654 | 1.505022  |
| H | 0.049338  | -3.559826 | 3.053005  |
| C | 1.506080  | -1.272767 | 2.615388  |
| H | 0.782374  | -0.551316 | 3.009854  |
| H | 1.880133  | -1.875863 | 3.451520  |
| H | 2.349273  | -0.716811 | 2.197086  |
| C | -2.274482 | -1.482701 | -0.179411 |
| C | -2.610787 | -2.588370 | -0.987423 |
| C | -3.314600 | -0.817283 | 0.501313  |
| C | -3.933191 | -3.011392 | -1.104769 |
| H | -1.822273 | -3.110094 | -1.522319 |
| C | -4.635119 | -1.250294 | 0.386223  |
| H | -3.073017 | 0.028331  | 1.138836  |
| C | -4.953112 | -2.346008 | -0.419388 |
| H | -4.167585 | -3.867380 | -1.732418 |
| H | -5.418512 | -0.730325 | 0.931964  |
| H | -5.983165 | -2.679043 | -0.511028 |

TS11B

|                              |                            |
|------------------------------|----------------------------|
| B3LYP electronic energy:     | -1321.09317788 a.u.        |
| B3LYP enthalpy:              | -1320.637882 a.u.          |
| B3LYP free energy:           | -1320.721839 a.u.          |
| M06 SCF energy in solution:  | -1322.23867978 a.u.        |
| M06 enthalpy in solution:    | -1321.783384 a.u.          |
| M06 free energy in solution: | -1321.867341 a.u.          |
| Imaginary frequency:         | -246.5845 cm <sup>-1</sup> |

Cartesian coordinates

| ATOM | X         | Y         | Z         |
|------|-----------|-----------|-----------|
| H    | -6.479805 | -0.290346 | -0.872264 |
| H    | -5.605637 | 1.586170  | 0.564079  |
| H    | -3.163625 | 1.667425  | 1.048255  |
| Ni   | -0.737461 | -0.113342 | 0.290353  |
| C    | 2.554768  | -2.684926 | 2.469297  |
| C    | 1.864987  | -3.083476 | 1.319189  |
| C    | 1.049784  | -2.187148 | 0.636317  |
| C    | 0.940426  | -0.844915 | 1.079998  |
| C    | 1.584455  | -0.473457 | 2.267692  |
| C    | 2.384406  | -1.391730 | 2.960466  |
| H    | 3.194775  | -3.389642 | 2.993734  |
| H    | 1.500576  | 0.545530  | 2.630153  |
| H    | 2.888042  | -1.080384 | 3.872247  |
| C    | 0.059004  | -2.710721 | -0.377341 |
| O    | 0.122079  | -3.830259 | -0.896310 |
| N    | -0.931514 | -1.806816 | -0.507944 |
| C    | -2.148115 | -2.092485 | -1.213265 |
| C    | -3.170352 | -1.069266 | -0.772341 |
| C    | -4.525081 | -1.169317 | -1.101625 |
| C    | -5.422983 | -0.217107 | -0.631834 |
| C    | -4.943690 | 0.825469  | 0.163885  |
| C    | -3.583845 | 0.876465  | 0.439781  |
| N    | -2.707525 | -0.038575 | -0.019476 |
| H    | -4.860920 | -2.002859 | -1.711093 |
| H    | 1.895872  | -4.108629 | 0.958987  |
| H    | -2.034603 | -2.035157 | -2.311836 |
| H    | -2.517151 | -3.109191 | -1.007145 |
| C    | 0.090769  | 1.622664  | 0.427047  |

|   |           |           |           |
|---|-----------|-----------|-----------|
| C | 1.021786  | 0.792639  | 0.045316  |
| C | -0.163467 | 3.109547  | 0.452951  |
| C | 1.152222  | 3.901329  | 0.287530  |
| H | 1.648689  | 3.656355  | -0.656436 |
| H | 0.950716  | 4.979932  | 0.298030  |
| H | 1.849350  | 3.681416  | 1.103727  |
| C | -1.115889 | 3.481035  | -0.707669 |
| H | -2.065044 | 2.940988  | -0.641258 |
| H | -1.332534 | 4.556529  | -0.689439 |
| H | -0.660801 | 3.240290  | -1.674474 |
| C | -0.807701 | 3.501436  | 1.802222  |
| H | -1.747015 | 2.964817  | 1.972841  |
| H | -0.139115 | 3.267446  | 2.638355  |
| H | -1.019097 | 4.577712  | 1.826886  |
| C | 2.249555  | 0.677451  | -0.757343 |
| C | 3.454382  | 1.252971  | -0.322857 |
| C | 2.224362  | 0.000575  | -1.988208 |
| C | 4.600691  | 1.174801  | -1.113765 |
| H | 3.488217  | 1.757669  | 0.637674  |
| C | 3.373582  | -0.079968 | -2.772835 |
| H | 1.300476  | -0.465634 | -2.317636 |
| C | 4.564376  | 0.509278  | -2.340737 |
| H | 5.525082  | 1.628632  | -0.766149 |
| H | 3.338869  | -0.606643 | -3.722730 |
| H | 5.459642  | 0.444100  | -2.953193 |

TS12  
 B3LYP electronic energy: -1013.87919699 a.u.  
 B3LYP enthalpy: -1013.524021 a.u.  
 B3LYP free energy: -1013.594470 a.u.  
 M06 SCF energy in solution: -1015.17240822 a.u.  
 M06 enthalpy in solution: -1014.817232 a.u.  
 M06 free energy in solution: -1014.887681 a.u.  
 Imaginary frequency: -70.6604 cm<sup>-1</sup>

#### Cartesian coordinates

| ATOM | X         | Y         | Z         |
|------|-----------|-----------|-----------|
| H    | -5.614033 | -2.117114 | 0.672731  |
| H    | -5.510799 | 0.321493  | 1.304403  |
| H    | -3.371875 | 1.530954  | 1.010859  |
| Ni   | -0.459963 | 0.651576  | -0.091781 |
| C    | 4.885672  | -0.771054 | -0.307011 |
| C    | 3.674121  | -1.314781 | -0.732642 |
| C    | 2.496364  | -1.093330 | -0.006630 |
| C    | 2.564281  | -0.353667 | 1.182579  |
| C    | 3.780218  | 0.174067  | 1.621786  |
| C    | 4.942821  | -0.023489 | 0.872240  |
| H    | 5.788460  | -0.938843 | -0.889114 |
| H    | 3.822136  | 0.732537  | 2.554128  |
| H    | 5.888658  | 0.391700  | 1.211447  |
| C    | 1.232592  | -1.759830 | -0.494874 |
| O    | 1.321674  | -2.854435 | -1.071492 |
| N    | 0.033836  | -1.164979 | -0.222847 |
| C    | -1.096084 | -2.009869 | -0.577314 |
| C    | -2.368188 | -1.407815 | -0.058554 |
| C    | -3.544144 | -2.155456 | 0.073037  |
| C    | -4.695126 | -1.548867 | 0.559507  |
| C    | -4.643425 | -0.197531 | 0.910126  |
| C    | -3.444542 | 0.481905  | 0.746931  |



|   |           |           |           |
|---|-----------|-----------|-----------|
| N | -2.324975 | -0.096155 | 0.269037  |
| H | -3.536296 | -3.205644 | -0.201913 |
| H | -1.183598 | -2.147846 | -1.669827 |
| H | -0.968774 | -3.025412 | -0.178213 |
| C | -1.069254 | 2.664863  | -0.192376 |
| C | 0.196180  | 2.679030  | 0.364937  |
| H | 0.887418  | 0.903451  | -0.539769 |
| C | -1.407385 | 3.071075  | -1.606037 |
| H | -1.616115 | 4.149336  | -1.665708 |
| H | -0.593043 | 2.850423  | -2.302112 |
| H | -2.301638 | 2.546226  | -1.959659 |
| C | 1.448006  | 3.250435  | -0.257213 |
| H | 1.426425  | 3.220715  | -1.348907 |
| H | 1.544140  | 4.301973  | 0.051496  |
| H | 2.338758  | 2.716714  | 0.084584  |
| H | 1.661395  | -0.205684 | 1.766388  |
| H | 3.619222  | -1.927492 | -1.626816 |
| H | 0.252034  | 2.556637  | 1.447480  |
| H | -1.901591 | 2.651057  | 0.506040  |

TS13  
 B3LYP electronic energy: -1013.88312428 a.u.  
 B3LYP enthalpy: -1013.527926 a.u.  
 B3LYP free energy: -1013.598368 a.u.  
 M06 SCF energy in solution: -1015.17582113 a.u.  
 M06 enthalpy in solution: -1014.820623 a.u.  
 M06 free energy in solution: -1014.891065 a.u.  
 Imaginary frequency: -39.9876 cm<sup>-1</sup>

#### Cartesian coordinates

| ATOM | X         | Y         | Z         |
|------|-----------|-----------|-----------|
| H    | 5.310133  | -2.433601 | -0.934765 |
| H    | 5.357350  | 0.026721  | -1.479611 |
| H    | 3.337609  | 1.382949  | -1.008820 |
| Ni   | 0.422394  | 0.668007  | 0.230206  |
| C    | -5.019015 | -0.467353 | 0.173856  |
| C    | -3.854336 | -1.096846 | 0.611105  |
| C    | -2.638455 | -0.893972 | -0.055487 |
| C    | -2.620879 | -0.081698 | -1.198256 |
| C    | -3.790437 | 0.532351  | -1.650045 |
| C    | -4.990610 | 0.350578  | -0.959035 |
| H    | -5.952127 | -0.622318 | 0.709942  |
| H    | -3.765911 | 1.148800  | -2.545654 |
| H    | -5.900263 | 0.833421  | -1.307639 |
| C    | -1.430981 | -1.652732 | 0.437964  |
| O    | -1.597416 | -2.765540 | 0.960702  |
| N    | -0.193442 | -1.113797 | 0.230753  |
| C    | 0.882869  | -2.033139 | 0.572384  |
| C    | 2.178732  | -1.512037 | 0.021360  |
| C    | 3.282479  | -2.340438 | -0.208591 |
| C    | 4.446968  | -1.802361 | -0.743351 |
| C    | 4.478938  | -0.439158 | -1.045378 |
| C    | 3.349398  | 0.323323  | -0.780343 |
| N    | 2.222561  | -0.187445 | -0.247449 |
| H    | 3.208261  | -3.398239 | 0.023744  |
| H    | 0.983494  | -2.168760 | 1.664355  |
| H    | 0.679794  | -3.038421 | 0.181214  |
| C    | 1.090370  | 2.650686  | -0.010696 |
| C    | 0.379116  | 2.606715  | 1.170826  |
| H    | -0.933774 | 1.015509  | 0.595319  |

|   |           |           |           |
|---|-----------|-----------|-----------|
| C | 0.545086  | 3.203270  | -1.305172 |
| H | 0.875104  | 4.242040  | -1.452113 |
| H | 0.893354  | 2.628098  | -2.171205 |
| H | -0.549370 | 3.192050  | -1.310640 |
| C | 1.002546  | 2.432029  | 2.532166  |
| H | 2.017497  | 2.026422  | 2.468153  |
| H | 1.056013  | 3.405414  | 3.041150  |
| H | 0.403409  | 1.767565  | 3.163176  |
| H | -1.689535 | 0.053317  | -1.738550 |
| H | -3.865907 | -1.762975 | 1.467903  |
| H | 2.173006  | 2.570946  | 0.065893  |
| H | -0.640403 | 2.984578  | 1.173800  |

S1-1  
 B3LYP electronic energy: -1168.69512914 a.u.  
 B3LYP enthalpy: -1168.262121 a.u.  
 B3LYP free energy: -1168.339576 a.u.  
 M06 SCF energy in solution: -1169.91908215 a.u.  
 M06 enthalpy in solution: -1169.486074 a.u.  
 M06 free energy in solution: -1169.563529 a.u.

Cartesian coordinates

| ATOM | X         | Y         | Z         |
|------|-----------|-----------|-----------|
| C    | 0.004448  | 1.752700  | 1.563808  |
| C    | 0.873608  | 2.857712  | 0.982655  |
| C    | 1.317914  | 2.584438  | -0.478647 |
| C    | 0.290283  | 1.820023  | -1.294229 |
| H    | 0.501462  | 1.048552  | 2.231199  |
| H    | 1.767033  | 2.978490  | 1.608476  |
| H    | 1.590283  | 3.538725  | -0.962896 |
| H    | 0.700621  | 1.282324  | -2.151362 |
| C    | -1.378191 | 1.758178  | 1.573776  |
| C    | -2.261590 | 2.781187  | 0.883020  |
| C    | -1.776602 | 3.194416  | -0.538584 |
| C    | -1.089693 | 2.068943  | -1.310806 |
| H    | -1.888404 | 1.097062  | 2.273551  |
| H    | -2.380150 | 3.686273  | 1.502139  |
| H    | -2.643618 | 3.551550  | -1.109459 |
| H    | -1.646092 | 1.679366  | -2.165482 |
| H    | 2.238557  | 1.988510  | -0.461119 |
| H    | 0.341775  | 3.813761  | 1.041247  |
| H    | -1.102205 | 4.054983  | -0.464009 |
| H    | -3.267110 | 2.347237  | 0.801658  |
| Ni   | -0.748956 | 0.505972  | -0.051861 |
| N    | 0.353193  | -1.494356 | 0.241248  |
| H    | 0.461737  | -1.735581 | -0.737527 |
| C    | -0.723602 | -2.237034 | 0.912300  |
| H    | -0.479542 | -3.304961 | 0.997689  |
| H    | -0.787084 | -1.834037 | 1.928109  |
| C    | -2.030217 | -2.041453 | 0.188098  |
| C    | -2.963350 | -3.064795 | 0.053062  |
| C    | -4.194062 | -2.799199 | -0.552989 |
| H    | -2.729316 | -4.056311 | 0.430469  |
| C    | -3.442978 | -0.538599 | -0.863909 |
| C    | -4.433171 | -1.503632 | -1.013358 |
| H    | -4.939507 | -3.580827 | -0.662849 |
| H    | -3.586576 | 0.473618  | -1.226713 |
| H    | -5.370858 | -1.239205 | -1.492752 |
| N    | -2.249983 | -0.783319 | -0.275968 |
| C    | 1.555467  | -1.337755 | 0.944259  |
| O    | 1.585331  | -1.442370 | 2.164504  |
| C    | 2.791030  | -1.059826 | 0.140924  |

|   |          |           |           |
|---|----------|-----------|-----------|
| C | 2.799313 | -0.827460 | -1.243721 |
| C | 4.009012 | -1.070154 | 0.837380  |
| C | 4.003365 | -0.619015 | -1.915695 |
| H | 1.871118 | -0.764313 | -1.803381 |
| C | 5.210534 | -0.861067 | 0.164770  |
| H | 3.985885 | -1.247504 | 1.907153  |
| C | 5.211231 | -0.638054 | -1.214472 |
| H | 3.996170 | -0.432243 | -2.985900 |
| H | 6.147041 | -0.872683 | 0.715563  |
| H | 6.147921 | -0.474647 | -1.740551 |

S1-2

|                              |                     |
|------------------------------|---------------------|
| B3LYP electronic energy:     | -1892.94583430 a.u. |
| B3LYP enthalpy:              | -1892.410276 a.u.   |
| B3LYP free energy:           | -1892.511756 a.u.   |
| M06 SCF energy in solution:  | -1893.96946606 a.u. |
| M06 enthalpy in solution:    | -1893.433908 a.u.   |
| M06 free energy in solution: | -1893.535388 a.u.   |

Cartesian coordinates

| ATOM | X         | Y         | Z         |
|------|-----------|-----------|-----------|
| Ni   | 0.653431  | -0.922718 | 0.421263  |
| N    | 0.469209  | -2.918176 | 0.377302  |
| H    | 0.174036  | -3.313666 | 1.263389  |
| C    | 1.704961  | -3.486863 | -0.167833 |
| H    | 1.837949  | -4.525327 | 0.160874  |
| H    | 1.571005  | -3.489064 | -1.256784 |
| C    | 2.914359  | -2.647832 | 0.192028  |
| C    | 4.212096  | -3.155145 | 0.109465  |
| C    | 5.290834  | -2.315544 | 0.380672  |
| H    | 4.369702  | -4.193769 | -0.168150 |
| C    | 3.713918  | -0.559868 | 0.794560  |
| C    | 5.035867  | -0.987864 | 0.727367  |
| H    | 6.309029  | -2.689494 | 0.321470  |
| H    | 3.468052  | 0.463882  | 1.058194  |
| H    | 5.842080  | -0.294403 | 0.944814  |
| N    | 2.664935  | -1.365499 | 0.540089  |
| C    | -0.596298 | -2.576452 | -0.527695 |
| O    | -0.374405 | -2.545715 | -1.753834 |
| C    | -1.983023 | -2.654529 | 0.035173  |
| C    | -2.287380 | -2.688525 | 1.408058  |
| C    | -3.037431 | -2.735288 | -0.887187 |
| C    | -3.605151 | -2.820286 | 1.840905  |
| H    | -1.503619 | -2.563749 | 2.151567  |
| C    | -4.356411 | -2.856423 | -0.452365 |
| H    | -2.792810 | -2.706949 | -1.943302 |
| C    | -4.647548 | -2.906167 | 0.912175  |
| H    | -3.820096 | -2.845630 | 2.906286  |
| H    | -5.159393 | -2.916152 | -1.182607 |
| H    | -5.675202 | -3.005147 | 1.251743  |
| P    | -0.094170 | 1.035921  | 0.046401  |
| C    | 0.707660  | 1.640866  | -1.515483 |
| C    | 1.350735  | 2.879069  | -1.655179 |
| C    | 0.701232  | 0.753307  | -2.608736 |
| C    | 1.965528  | 3.229068  | -2.861315 |
| H    | 1.377256  | 3.576581  | -0.823716 |
| C    | 1.304545  | 1.112189  | -3.814168 |
| H    | 0.231920  | -0.223762 | -2.510788 |
| C    | 1.940384  | 2.350237  | -3.944362 |
| H    | 2.461889  | 4.192375  | -2.951490 |
| H    | 1.284381  | 0.418150  | -4.650659 |
| H    | 2.416377  | 2.624932  | -4.882332 |

|   |           |          |           |
|---|-----------|----------|-----------|
| C | -1.889115 | 1.404502 | -0.272863 |
| C | -2.832596 | 0.867640 | 0.617248  |
| C | -2.345873 | 2.186002 | -1.344831 |
| C | -4.194184 | 1.117859 | 0.451862  |
| H | -2.497919 | 0.236155 | 1.435220  |
| C | -3.711354 | 2.430827 | -1.515076 |
| H | -1.636268 | 2.601260 | -2.053725 |
| C | -4.638176 | 1.901082 | -0.616458 |
| H | -4.908646 | 0.686576 | 1.147985  |
| H | -4.048562 | 3.035915 | -2.353214 |
| H | -5.700150 | 2.089749 | -0.751964 |
| C | 0.296841  | 2.343570 | 1.309194  |
| C | -0.261126 | 3.632651 | 1.286995  |
| C | 1.179143  | 2.015222 | 2.349747  |
| C | 0.073706  | 4.570728 | 2.264806  |
| H | -0.968770 | 3.901261 | 0.507926  |
| C | 1.514164  | 2.951672 | 3.330516  |
| H | 1.583586  | 1.006932 | 2.394557  |
| C | 0.964426  | 4.233816 | 3.287354  |
| H | -0.366603 | 5.564185 | 2.232116  |
| H | 2.195652  | 2.676629 | 4.131756  |
| H | 1.219442  | 4.964158 | 4.050966  |

S1-3

|                              |                     |
|------------------------------|---------------------|
| B3LYP electronic energy:     | -1012.66114652 a.u. |
| B3LYP enthalpy:              | -1012.324671 a.u.   |
| B3LYP free energy:           | -1012.398358 a.u.   |
| M06 SCF energy in solution:  | -1013.95756440 a.u. |
| M06 enthalpy in solution:    | -1013.621089 a.u.   |
| M06 free energy in solution: | -1013.694776 a.u.   |

Cartesian coordinates

| ATOM | X         | Y         | Z         |
|------|-----------|-----------|-----------|
| H    | -5.029636 | -2.810724 | 0.426348  |
| H    | -5.063644 | -0.672139 | 1.753567  |
| H    | -3.178093 | 0.943016  | 1.463423  |
| Ni   | -0.647764 | 0.992603  | -0.198257 |
| C    | 4.490777  | -1.644006 | 1.106044  |
| C    | 3.141736  | -1.919108 | 0.897895  |
| C    | 2.361044  | -1.075246 | 0.093039  |
| C    | 2.951398  | 0.054905  | -0.492405 |
| C    | 4.303185  | 0.326135  | -0.284339 |
| C    | 5.075729  | -0.522413 | 0.512073  |
| H    | 5.086907  | -2.303860 | 1.730308  |
| H    | 4.749400  | 1.207664  | -0.736017 |
| H    | 6.128494  | -0.306837 | 0.673914  |
| C    | 0.937622  | -1.479365 | -0.119387 |
| O    | 0.419015  | -2.407869 | 0.482266  |
| N    | 0.190066  | -0.776658 | -1.099975 |
| C    | -1.001663 | -1.486967 | -1.603883 |
| C    | -2.160609 | -1.348667 | -0.642870 |
| C    | -3.165083 | -2.306946 | -0.539241 |
| C    | -4.234629 | -2.077677 | 0.325758  |
| C    | -4.255582 | -0.893417 | 1.063623  |
| C    | -3.210411 | 0.011216  | 0.910436  |
| N    | -2.177085 | -0.202972 | 0.071397  |
| H    | -3.102543 | -3.220657 | -1.122782 |
| H    | 2.668529  | -2.785908 | 1.346521  |
| H    | -1.265317 | -1.014071 | -2.556944 |
| H    | -0.782926 | -2.545378 | -1.783310 |
| C    | 0.304616  | 2.623700  | -0.228153 |
| C    | -0.873482 | 2.773911  | 0.279559  |

|   |           |           |           |
|---|-----------|-----------|-----------|
| C | 1.549696  | 3.376762  | -0.562587 |
| H | 1.449174  | 4.450961  | -0.349269 |
| H | 2.409621  | 3.007108  | 0.012235  |
| H | 1.815270  | 3.278189  | -1.624691 |
| C | -1.863489 | 3.719206  | 0.865226  |
| H | -2.817505 | 3.693063  | 0.321838  |
| H | -2.087323 | 3.470988  | 1.911985  |
| H | -1.499122 | 4.756947  | 0.846006  |
| H | 2.353586  | 0.752033  | -1.069264 |
| H | 0.754402  | -0.365059 | -1.835484 |

S2-1

|                              |                     |
|------------------------------|---------------------|
| B3LYP electronic energy:     | -1013.90665166 a.u. |
| B3LYP enthalpy:              | -1013.546788 a.u.   |
| B3LYP free energy:           | -1013.620479 a.u.   |
| M06 SCF energy in solution:  | -1015.19293111 a.u. |
| M06 enthalpy in solution:    | -1014.833067 a.u.   |
| M06 free energy in solution: | -1014.906758 a.u.   |

Cartesian coordinates

| ATOM | X         | Y         | Z         |
|------|-----------|-----------|-----------|
| H    | 5.865990  | -0.970984 | -0.008461 |
| H    | 5.116976  | 1.378106  | -0.529671 |
| H    | 2.681710  | 1.858777  | -0.590559 |
| Ni   | 0.084708  | 0.086342  | -0.179250 |
| C    | -4.512319 | -0.979847 | -0.389390 |
| C    | -3.511686 | -1.912585 | -0.100478 |
| C    | -2.185344 | -1.492619 | -0.059772 |
| C    | -1.810949 | -0.156199 | -0.289873 |
| C    | -2.823502 | 0.761829  | -0.587680 |
| C    | -4.165402 | 0.349324  | -0.636851 |
| H    | -5.554379 | -1.287275 | -0.427025 |
| H    | -2.598006 | 1.807457  | -0.790445 |
| H    | -4.941049 | 1.076232  | -0.869828 |
| C    | -1.041512 | -2.415155 | 0.204998  |
| O    | -1.106722 | -3.620164 | 0.454084  |
| N    | 0.125105  | -1.711846 | 0.119854  |
| C    | 1.393627  | -2.353093 | 0.342458  |
| C    | 2.488341  | -1.342918 | 0.129013  |
| C    | 3.842903  | -1.687354 | 0.183939  |
| C    | 4.810556  | -0.717042 | -0.045439 |
| C    | 4.400528  | 0.587601  | -0.332868 |
| C    | 3.040829  | 0.860755  | -0.366007 |
| N    | 2.095539  | -0.072703 | -0.132954 |
| H    | 4.119457  | -2.714739 | 0.400467  |
| H    | -3.741098 | -2.958298 | 0.088692  |
| H    | 1.472844  | -2.770726 | 1.361002  |
| H    | 1.544819  | -3.206889 | -0.337758 |
| C    | -1.121170 | 2.793949  | 2.205371  |
| H    | -1.557333 | 1.812111  | 1.992028  |
| H    | -1.812410 | 3.335261  | 2.860681  |
| H    | -0.188654 | 2.636599  | 2.761994  |
| C    | -0.868130 | 3.573994  | 0.912296  |
| H    | -0.456916 | 4.565914  | 1.148559  |
| H    | -1.817988 | 3.752946  | 0.391754  |
| C    | 0.109799  | 2.878213  | -0.044124 |
| H    | -0.354370 | 1.906967  | -0.346223 |
| H    | 1.036745  | 2.661927  | 0.498183  |
| C    | 0.402737  | 3.670263  | -1.321756 |
| H    | 0.846800  | 4.642530  | -1.077255 |
| H    | 1.095675  | 3.138703  | -1.983997 |
| H    | -0.517198 | 3.856266  | -1.887115 |

S4-1  
 B3LYP electronic energy: -2929.22069242 a.u.  
 B3LYP enthalpy: -2928.394966 a.u.  
 B3LYP free energy: -2928.538585 a.u.  
 M06 SCF energy in solution: -2929.90780630 a.u.  
 M06 enthalpy in solution: -2929.082080 a.u.  
 M06 free energy in solution: -2929.225699 a.u.

Cartesian coordinates

| ATOM | X         | Y         | Z         |
|------|-----------|-----------|-----------|
| H    | -7.111855 | -1.941537 | 0.294014  |
| H    | -6.781688 | -2.404380 | 2.747043  |
| H    | -4.514986 | -3.091406 | 3.529373  |
| C    | -2.240185 | 1.584078  | -4.772309 |
| C    | -2.670245 | 0.435415  | -4.120612 |
| C    | -1.972432 | -0.079941 | -3.012046 |
| C    | -0.807878 | 0.563228  | -2.528403 |
| C    | -0.384884 | 1.712566  | -3.226984 |
| C    | -1.084569 | 2.226090  | -4.318476 |
| H    | -2.790687 | 1.971463  | -5.625774 |
| H    | -0.725687 | 3.124548  | -4.817152 |
| C    | -2.569977 | -1.327325 | -2.425648 |
| O    | -3.427582 | -1.989145 | -3.022486 |
| N    | -2.151538 | -1.697164 | -1.174877 |
| C    | -2.601126 | -2.929990 | -0.541576 |
| C    | -3.814750 | -2.762271 | 0.358357  |
| C    | -5.052309 | -2.373102 | -0.178143 |
| C    | -6.139530 | -2.237681 | 0.679666  |
| C    | -5.961324 | -2.495555 | 2.040994  |
| C    | -4.694805 | -2.879974 | 2.476024  |
| N    | -3.636808 | -3.014003 | 1.663946  |
| H    | -5.133067 | -2.194486 | -1.245901 |
| H    | -3.552875 | -0.101000 | -4.454183 |
| H    | -2.837269 | -3.631838 | -1.347876 |
| H    | -1.786408 | -3.339782 | 0.061762  |
| Ni   | 0.335447  | 0.066885  | -1.053844 |
| P    | 2.186227  | -0.993957 | -0.231230 |
| P    | -0.439999 | 1.592930  | 0.514177  |
| H    | -1.464567 | -1.113353 | -0.704739 |
| H    | 0.672384  | -0.745201 | -2.240157 |
| C    | 2.333551  | -2.756489 | -0.782331 |
| C    | 3.534694  | -3.471578 | -0.642331 |
| C    | 1.223936  | -3.399681 | -1.347882 |
| C    | 3.620427  | -4.800241 | -1.055599 |
| H    | 4.408449  | -2.988831 | -0.214807 |
| C    | 1.309136  | -4.734026 | -1.755219 |
| H    | 0.300230  | -2.847903 | -1.490817 |
| C    | 2.505798  | -5.435498 | -1.610790 |
| H    | 4.558236  | -5.338981 | -0.948014 |
| H    | 0.440154  | -5.217438 | -2.193107 |
| H    | 2.574320  | -6.470876 | -1.933971 |
| C    | 3.692603  | -0.201056 | -0.964032 |
| C    | 3.567346  | 0.398517  | -2.229111 |
| C    | 4.948932  | -0.197411 | -0.337497 |
| C    | 4.671556  | 0.984031  | -2.850402 |
| H    | 2.600683  | 0.400432  | -2.724393 |
| C    | 6.050930  | 0.392685  | -0.959752 |
| H    | 5.069155  | -0.644108 | 0.644353  |
| C    | 5.915862  | 0.984346  | -2.216956 |
| H    | 4.556658  | 1.440275  | -3.830116 |
| H    | 7.015932  | 0.388229  | -0.459489 |

|   |           |           |           |
|---|-----------|-----------|-----------|
| H | 6.775005  | 1.442787  | -2.699528 |
| C | 2.583625  | -1.117179 | 1.575826  |
| C | 2.370976  | -2.305833 | 2.292905  |
| C | 2.986165  | 0.029194  | 2.283689  |
| C | 2.566758  | -2.349521 | 3.675568  |
| H | 2.056281  | -3.205138 | 1.773624  |
| C | 3.189124  | -0.019540 | 3.662753  |
| H | 3.147488  | 0.964196  | 1.757016  |
| C | 2.979814  | -1.208876 | 4.364488  |
| H | 2.400325  | -3.280947 | 4.210500  |
| H | 3.506068  | 0.877579  | 4.187674  |
| H | 3.135041  | -1.244602 | 5.439443  |
| C | -1.213583 | 0.951094  | 2.063405  |
| C | -2.108586 | 1.718209  | 2.829779  |
| C | -0.899315 | -0.346710 | 2.489311  |
| C | -2.658765 | 1.199654  | 4.001797  |
| H | -2.382761 | 2.716862  | 2.503547  |
| C | -1.453288 | -0.866411 | 3.660509  |
| H | -0.217256 | -0.953785 | 1.904039  |
| C | -2.330941 | -0.092941 | 4.419966  |
| H | -3.349918 | 1.803005  | 4.584619  |
| H | -1.206294 | -1.878434 | 3.966114  |
| H | -2.766802 | -0.496988 | 5.329945  |
| C | -1.727698 | 2.774946  | -0.085619 |
| C | -1.526810 | 4.159671  | -0.154563 |
| C | -2.958574 | 2.245197  | -0.508716 |
| C | -2.536296 | 4.998663  | -0.635470 |
| H | -0.584945 | 4.591714  | 0.167321  |
| C | -3.964652 | 3.084216  | -0.982733 |
| H | -3.131413 | 1.173758  | -0.472409 |
| C | -3.755819 | 4.464410  | -1.049323 |
| H | -2.364600 | 6.070933  | -0.683347 |
| H | -4.908866 | 2.657642  | -1.309659 |
| H | -4.539221 | 5.117227  | -1.425093 |
| C | 0.914383  | 2.710795  | 1.098473  |
| C | 1.911877  | 3.062532  | 0.173592  |
| C | 1.001707  | 3.209849  | 2.406403  |
| C | 2.966450  | 3.898813  | 0.543623  |
| H | 1.871538  | 2.669410  | -0.838428 |
| C | 2.060726  | 4.041273  | 2.778095  |
| H | 0.249034  | 2.942295  | 3.140901  |
| C | 3.044307  | 4.388475  | 1.849499  |
| H | 3.730151  | 4.156233  | -0.185113 |
| H | 2.116018  | 4.417032  | 3.796594  |
| H | 3.868127  | 5.033921  | 2.142332  |
| H | 0.518964  | 2.230743  | -2.909500 |

S4-2

|                              |                     |
|------------------------------|---------------------|
| B3LYP electronic energy:     | -1012.63066483 a.u. |
| B3LYP enthalpy:              | -1012.295685 a.u.   |
| B3LYP free energy:           | -1012.368353 a.u.   |
| M06 SCF energy in solution:  | -1013.91923014 a.u. |
| M06 enthalpy in solution:    | -1013.584250 a.u.   |
| M06 free energy in solution: | -1013.656918 a.u.   |

Cartesian coordinates

| ATOM | X         | Y         | Z         |
|------|-----------|-----------|-----------|
| H    | 3.013581  | -1.560670 | 2.916149  |
| H    | 5.402339  | -1.278891 | 2.230337  |
| H    | 5.900145  | -0.804099 | -0.189743 |
| Ni   | -0.680289 | 0.956500  | -0.072073 |
| C    | -4.561366 | -1.770269 | 0.454586  |

|   |           |           |           |
|---|-----------|-----------|-----------|
| C | -3.393316 | -2.185561 | -0.171270 |
| C | -2.298170 | -1.305717 | -0.208171 |
| C | -2.323539 | -0.000922 | 0.331401  |
| C | -3.530279 | 0.383805  | 0.945235  |
| C | -4.622180 | -0.484987 | 1.015457  |
| H | -5.422003 | -2.431629 | 0.508796  |
| H | -3.630324 | 1.376739  | 1.381510  |
| H | -5.538049 | -0.161786 | 1.506935  |
| C | -1.046719 | -1.697060 | -0.862059 |
| O | -0.851737 | -2.600502 | -1.647647 |
| N | 0.066185  | -0.795670 | -0.446316 |
| C | 1.320474  | -0.983285 | -1.203893 |
| C | 2.513473  | -1.023176 | -0.268169 |
| C | 3.276286  | -1.359140 | 1.879893  |
| C | 4.606059  | -1.201504 | 1.496852  |
| C | 4.877564  | -0.938121 | 0.152292  |
| H | 1.245963  | -1.933122 | -1.748206 |
| H | 1.428628  | -0.182651 | -1.938115 |
| C | 0.628220  | 2.288436  | -0.407593 |
| C | -0.346383 | 3.068320  | 0.030609  |
| C | 1.991018  | 2.637357  | -0.903039 |
| H | 2.122105  | 2.318953  | -1.946012 |
| H | 2.199985  | 3.716671  | -0.859544 |
| H | 2.765116  | 2.122354  | -0.320823 |
| C | -0.536835 | 4.553037  | 0.201949  |
| H | -0.748741 | 4.816575  | 1.245969  |
| H | 0.370133  | 5.083722  | -0.106135 |
| H | -1.372442 | 4.924725  | -0.404737 |
| H | -3.312627 | -3.169067 | -0.626833 |
| H | 0.298165  | -1.034000 | 0.533778  |
| N | 2.252625  | -1.274538 | 1.020206  |
| C | 3.817624  | -0.844164 | -0.745384 |
| H | 3.991323  | -0.637022 | -1.797617 |
| H | -1.314556 | 2.524384  | 0.364091  |

S4-3

|                              |                     |
|------------------------------|---------------------|
| B3LYP electronic energy:     | -1012.67171505 a.u. |
| B3LYP enthalpy:              | -1012.335704 a.u.   |
| B3LYP free energy:           | -1012.405549 a.u.   |
| M06 SCF energy in solution:  | -1013.96138094 a.u. |
| M06 enthalpy in solution:    | -1013.625370 a.u.   |
| M06 free energy in solution: | -1013.695215 a.u.   |

Cartesian coordinates

| ATOM | X         | Y         | Z         |
|------|-----------|-----------|-----------|
| H    | 5.716877  | -1.165517 | -0.163769 |
| H    | 5.036604  | 1.257096  | -0.230170 |
| H    | 2.588603  | 1.810522  | -0.092923 |
| Ni   | 0.017059  | 0.214629  | 0.219257  |
| C    | -4.634543 | -0.587373 | -0.112841 |
| C    | -3.658053 | -1.560843 | -0.277670 |
| C    | -2.310760 | -1.210934 | -0.086206 |
| C    | -1.885423 | 0.108975  | 0.222848  |
| C    | -2.904987 | 1.066590  | 0.357335  |
| C    | -4.250499 | 0.723120  | 0.210346  |
| H    | -5.685229 | -0.834987 | -0.238459 |
| H    | -2.645971 | 2.101486  | 0.561324  |
| H    | -5.016029 | 1.486994  | 0.333230  |
| C    | -1.245612 | -2.210396 | -0.270654 |
| O    | -1.246018 | -3.209944 | -0.961462 |
| N    | -0.048033 | -1.803284 | 0.465045  |
| C    | 1.219628  | -2.469913 | 0.159909  |



|   |           |           |           |
|---|-----------|-----------|-----------|
| C | 2.341882  | -1.451140 | 0.085736  |
| C | 3.678257  | -1.846877 | 0.008579  |
| C | 4.671410  | -0.876883 | -0.103052 |
| C | 4.298516  | 0.467108  | -0.138036 |
| C | 2.948423  | 0.787869  | -0.052564 |
| N | 1.985484  | -0.146390 | 0.065533  |
| H | 3.928614  | -2.903540 | 0.032664  |
| H | 1.457868  | -3.251757 | 0.891324  |
| H | 1.093309  | -2.975065 | -0.804211 |
| C | 0.057447  | 2.108564  | 0.158581  |
| C | 0.117732  | 2.782230  | -1.003739 |
| H | 0.062553  | 2.208175  | -1.932150 |
| C | 0.084182  | 2.755117  | 1.527725  |
| H | 0.156589  | 3.851246  | 1.503867  |
| H | -0.820523 | 2.496895  | 2.094053  |
| H | 0.930784  | 2.385864  | 2.125493  |
| C | 0.227033  | 4.275478  | -1.227300 |
| H | -0.643158 | 4.653355  | -1.783493 |
| H | 0.294116  | 4.845000  | -0.295661 |
| H | 1.111026  | 4.524595  | -1.832512 |
| H | -3.915586 | -2.581807 | -0.547700 |
| H | -0.249913 | -1.755055 | 1.463574  |

S6-2

|                              |                     |
|------------------------------|---------------------|
| B3LYP electronic energy:     | -1125.80168765 a.u. |
| B3LYP enthalpy:              | -1125.469527 a.u.   |
| B3LYP free energy:           | -1125.537568 a.u.   |
| M06 SCF energy in solution:  | -1127.03407735 a.u. |
| M06 enthalpy in solution:    | -1126.701917 a.u.   |
| M06 free energy in solution: | -1126.769958 a.u.   |

Cartesian coordinates

| ATOM | X         | Y         | Z         |
|------|-----------|-----------|-----------|
| H    | 5.898436  | 0.009044  | 0.637785  |
| H    | 5.220257  | 2.388530  | 0.996313  |
| H    | 2.812238  | 3.010084  | 0.736390  |
| Ni   | 0.269766  | 1.298034  | -0.018084 |
| C    | -3.098999 | 0.063899  | 0.079171  |
| C    | -0.906689 | -1.268714 | -0.662677 |
| O    | -0.781273 | -2.190428 | -1.469147 |
| N    | 0.178050  | -0.553186 | -0.172403 |
| C    | 2.534124  | -0.214294 | 0.091657  |
| C    | 4.859214  | 0.313689  | 0.540683  |
| C    | 4.491042  | 1.627836  | 0.737991  |
| C    | 3.136167  | 1.982673  | 0.593838  |
| N    | 2.196957  | 1.097128  | 0.282034  |
| C    | -1.424452 | 1.823037  | -0.343345 |
| C    | -2.704053 | 1.435896  | -0.318775 |
| C    | 1.459900  | -1.108093 | -0.230609 |
| C    | 1.808723  | -2.439440 | -0.477440 |
| H    | 1.042969  | -3.141739 | -0.770379 |
| C    | 3.145869  | -2.874925 | -0.363623 |
| C    | 3.885825  | -0.659121 | 0.205211  |
| C    | 4.178701  | -2.023841 | -0.027306 |
| H    | 3.358004  | -3.923414 | -0.556789 |
| H    | 5.203248  | -2.376001 | 0.049366  |
| C    | -3.806479 | 2.443707  | -0.610570 |
| H    | -4.302305 | 2.794644  | 0.304985  |
| H    | -3.405521 | 3.323794  | -1.120842 |
| H    | -4.581675 | 2.009255  | -1.252147 |
| C    | -0.821617 | 3.186514  | -0.514601 |
| H    | 0.284653  | 3.154648  | -0.243754 |

|   |           |           |           |
|---|-----------|-----------|-----------|
| H | -0.825380 | 3.564941  | -1.543814 |
| H | -1.223702 | 3.941052  | 0.171307  |
| C | -2.279722 | -1.090007 | -0.034349 |
| C | -2.795032 | -2.327955 | 0.395777  |
| C | -4.057123 | -2.457304 | 0.963888  |
| H | -4.407008 | -3.430282 | 1.297734  |
| C | -4.866759 | -1.328737 | 1.072686  |
| H | -5.864300 | -1.398645 | 1.498765  |
| C | -4.391995 | -0.102794 | 0.622175  |
| H | -2.177292 | -3.208627 | 0.259641  |
| H | -5.040816 | 0.761442  | 0.708870  |

S1-TS1

|                              |                             |
|------------------------------|-----------------------------|
| B3LYP electronic energy:     | -1168.65949502 a.u.         |
| B3LYP enthalpy:              | -1168.231667 a.u.           |
| B3LYP free energy:           | -1168.308813 a.u.           |
| M06 SCF energy in solution:  | -1169.88480544 a.u.         |
| M06 enthalpy in solution:    | -1169.456977 a.u.           |
| M06 free energy in solution: | -1169.534123 a.u.           |
| Imaginary frequency:         | -1027.4139 cm <sup>-1</sup> |

Cartesian coordinates

| ATOM | X         | Y         | Z         |
|------|-----------|-----------|-----------|
| H    | 3.967981  | -4.403329 | -0.209825 |
| H    | 4.258149  | -2.818862 | -2.142066 |
| H    | 2.760340  | -0.822020 | -2.276542 |
| Ni   | 0.397197  | 0.240500  | -0.373147 |
| C    | -5.320628 | -0.143533 | 0.034949  |
| C    | -4.257475 | -0.737549 | 0.711850  |
| C    | -2.979953 | -0.781993 | 0.134670  |
| C    | -2.796744 | -0.257152 | -1.152012 |
| C    | -3.866238 | 0.322823  | -1.837827 |
| C    | -5.127356 | 0.389987  | -1.242703 |
| H    | -6.302754 | -0.103413 | 0.498947  |
| H    | -3.715158 | 0.715231  | -2.840421 |
| H    | -5.958231 | 0.845749  | -1.775275 |
| C    | -1.891083 | -1.466428 | 0.916434  |
| O    | -2.178793 | -2.390444 | 1.685501  |
| N    | -0.603463 | -1.021996 | 0.730688  |
| C    | 0.442157  | -1.749924 | 1.449228  |
| C    | 1.543724  | -2.126559 | 0.481088  |
| C    | 2.346099  | -3.258025 | 0.634770  |
| C    | 3.339318  | -3.522631 | -0.306983 |
| C    | 3.504332  | -2.646779 | -1.380677 |
| C    | 2.670804  | -1.535612 | -1.463100 |
| N    | 1.715798  | -1.276211 | -0.555599 |
| H    | 2.181888  | -3.922870 | 1.477157  |
| H    | -4.395871 | -1.181600 | 1.692357  |
| H    | 0.872612  | -1.121224 | 2.244109  |
| H    | 0.005225  | -2.631107 | 1.927676  |
| H    | -0.673724 | 0.463258  | 0.637362  |
| H    | -1.818864 | -0.319420 | -1.620079 |
| C    | -0.004782 | 2.185819  | -0.801670 |
| C    | -0.155889 | 3.244738  | 0.294522  |
| C    | 0.169179  | 2.855459  | 1.753532  |
| C    | 1.484488  | 2.183228  | 2.070675  |
| H    | -0.895911 | 2.103937  | -1.423210 |
| H    | -1.205765 | 3.562671  | 0.293921  |
| H    | 0.072321  | 3.759606  | 2.376971  |
| H    | 1.464932  | 1.600717  | 2.993213  |
| C    | 1.183979  | 1.740061  | -1.416459 |
| C    | 2.622895  | 2.171462  | -1.168245 |

|   |           |          |           |
|---|-----------|----------|-----------|
| C | 2.941542  | 2.956904 | 0.122716  |
| C | 2.643762  | 2.214609 | 1.401250  |
| H | 1.052233  | 1.359897 | -2.435066 |
| H | 2.935974  | 2.798771 | -2.018625 |
| H | 4.012327  | 3.197978 | 0.100373  |
| H | 3.470720  | 1.632125 | 1.809211  |
| H | -0.627031 | 2.184587 | 2.103774  |
| H | 0.412504  | 4.138623 | 0.011444  |
| H | 2.421630  | 3.917986 | 0.103167  |
| H | 3.274190  | 1.286295 | -1.206141 |

#### S1-TS2

|                              |                             |
|------------------------------|-----------------------------|
| B3LYP electronic energy:     | -1892.92471338 a.u.         |
| B3LYP enthalpy:              | -1892.394781 a.u.           |
| B3LYP free energy:           | -1892.496547 a.u.           |
| M06 SCF energy in solution:  | -1893.94755887 a.u.         |
| M06 enthalpy in solution:    | -1893.417626 a.u.           |
| M06 free energy in solution: | -1893.519392 a.u.           |
| Imaginary frequency:         | -1107.4239 cm <sup>-1</sup> |

#### Cartesian coordinates

| ATOM | X         | Y         | Z         |
|------|-----------|-----------|-----------|
| H    | -1.328372 | 6.548337  | 0.618169  |
| H    | 0.520036  | 5.453837  | 1.928247  |
| H    | 0.897545  | 3.000015  | 1.627470  |
| Ni   | -0.609416 | 0.748278  | -0.235276 |
| C    | -5.085044 | -2.919640 | 0.119638  |
| C    | -4.928657 | -1.625128 | -0.369422 |
| C    | -3.775277 | -0.882922 | -0.070771 |
| C    | -2.797681 | -1.453483 | 0.755665  |
| C    | -2.959153 | -2.747330 | 1.256360  |
| C    | -4.098759 | -3.485527 | 0.933941  |
| H    | -5.978217 | -3.487430 | -0.128476 |
| H    | -2.194368 | -3.170605 | 1.902379  |
| H    | -4.223777 | -4.493619 | 1.321547  |
| C    | -3.696654 | 0.509940  | -0.631736 |
| O    | -4.734901 | 1.115730  | -0.919841 |
| N    | -2.442776 | 1.054280  | -0.819461 |
| C    | -2.401893 | 2.412746  | -1.364554 |
| C    | -1.634356 | 3.333007  | -0.434448 |
| C    | -1.902006 | 4.699284  | -0.335238 |
| C    | -1.129882 | 5.484616  | 0.519771  |
| C    | -0.104656 | 4.881845  | 1.249589  |
| C    | 0.104424  | 3.514447  | 1.093260  |
| N    | -0.641470 | 2.753000  | 0.276014  |
| H    | -2.710151 | 5.133456  | -0.916130 |
| H    | -5.692051 | -1.161358 | -0.985428 |
| H    | -1.894269 | 2.404389  | -2.341421 |
| H    | -3.424603 | 2.765891  | -1.522768 |
| H    | -1.557516 | 0.068822  | -1.230598 |
| H    | -1.913992 | -0.879602 | 1.019242  |
| P    | 1.217900  | -0.372764 | -0.129660 |
| C    | 1.662023  | -1.479351 | -1.551188 |
| C    | 0.624667  | -2.134245 | -2.233982 |
| C    | 2.985875  | -1.702211 | -1.961698 |
| C    | 0.904196  | -2.999527 | -3.292052 |
| H    | -0.404105 | -1.956379 | -1.933114 |
| C    | 3.263647  | -2.560548 | -3.028247 |
| H    | 3.804366  | -1.201851 | -1.453581 |
| C    | 2.224667  | -3.212648 | -3.694206 |
| H    | 0.088589  | -3.499585 | -3.807747 |
| H    | 4.293737  | -2.716961 | -3.338278 |

|   |          |           |           |
|---|----------|-----------|-----------|
| H | 2.442093 | -3.878820 | -4.525031 |
| C | 2.761554 | 0.639158  | 0.081099  |
| C | 3.814257 | 0.294295  | 0.942441  |
| C | 2.862393 | 1.827330  | -0.662161 |
| C | 4.940498 | 1.114443  | 1.052576  |
| H | 3.756151 | -0.616065 | 1.531426  |
| C | 3.992029 | 2.639785  | -0.561323 |
| H | 2.044464 | 2.116276  | -1.317465 |
| C | 5.034110 | 2.285868  | 0.299416  |
| H | 5.745568 | 0.834632  | 1.727337  |
| H | 4.055153 | 3.552272  | -1.148650 |
| H | 5.911335 | 2.921688  | 0.385616  |
| C | 1.275362 | -1.514588 | 1.329718  |
| C | 0.683910 | -1.075458 | 2.526753  |
| C | 1.857482 | -2.790386 | 1.295790  |
| C | 0.685314 | -1.884298 | 3.663409  |
| H | 0.210432 | -0.097085 | 2.560965  |
| C | 1.853105 | -3.602926 | 2.432518  |
| H | 2.310226 | -3.154968 | 0.379058  |
| C | 1.270010 | -3.152573 | 3.618081  |
| H | 0.222596 | -1.528061 | 4.580024  |
| H | 2.304612 | -4.590722 | 2.388567  |
| H | 1.265551 | -3.787460 | 4.500108  |

S1-TS3

|                              |                            |
|------------------------------|----------------------------|
| B3LYP electronic energy:     | -1012.61930616 a.u.        |
| B3LYP enthalpy:              | -1012.289527 a.u.          |
| B3LYP free energy:           | -1012.361897 a.u.          |
| M06 SCF energy in solution:  | -1013.91937047 a.u.        |
| M06 enthalpy in solution:    | -1013.589591 a.u.          |
| M06 free energy in solution: | -1013.661961 a.u.          |
| Imaginary frequency:         | -962.3250 cm <sup>-1</sup> |

Cartesian coordinates

| ATOM | X         | Y         | Z         |
|------|-----------|-----------|-----------|
| H    | -5.362782 | -2.386912 | 0.808675  |
| H    | -5.312100 | -0.034706 | 1.700063  |
| H    | -3.280512 | 1.354335  | 1.272181  |
| Ni   | -0.564166 | 0.777478  | -0.299794 |
| C    | 4.889112  | -0.923292 | 0.235779  |
| C    | 3.726352  | -1.514088 | -0.254012 |
| C    | 2.464992  | -1.040106 | 0.136417  |
| C    | 2.389858  | 0.013265  | 1.057942  |
| C    | 3.555995  | 0.594026  | 1.562760  |
| C    | 4.807006  | 0.134011  | 1.146628  |
| H    | 5.860088  | -1.291810 | -0.084929 |
| H    | 3.485136  | 1.401521  | 2.287191  |
| H    | 5.713320  | 0.589918  | 1.537130  |
| C    | 1.260762  | -1.760404 | -0.407320 |
| O    | 1.348964  | -2.958295 | -0.700183 |
| N    | 0.094047  | -1.045404 | -0.542852 |
| C    | -1.061512 | -1.804762 | -1.015244 |
| C    | -2.294380 | -1.383554 | -0.248950 |
| C    | -3.394888 | -2.221153 | -0.059248 |
| C    | -4.500120 | -1.747368 | 0.644281  |
| C    | -4.476516 | -0.443646 | 1.141513  |
| C    | -3.347010 | 0.334264  | 0.909801  |
| N    | -2.279609 | -0.119674 | 0.231015  |
| H    | -3.374092 | -3.232108 | -0.454370 |
| H    | -1.238279 | -1.626828 | -2.089002 |
| H    | -0.861655 | -2.874150 | -0.902425 |
| C    | -0.832628 | 2.681101  | -0.283346 |

|   |           |           |           |
|---|-----------|-----------|-----------|
| C | 0.345081  | 2.454486  | -0.692138 |
| H | 0.491788  | 0.294063  | -1.214496 |
| C | -1.931841 | 3.616061  | 0.060063  |
| H | -1.667438 | 4.651582  | -0.190648 |
| H | -2.853705 | 3.364594  | -0.478362 |
| H | -2.163064 | 3.585290  | 1.132675  |
| C | 1.669548  | 2.885750  | -1.199348 |
| H | 1.809751  | 2.578759  | -2.242694 |
| H | 1.764889  | 3.978277  | -1.149927 |
| H | 2.483155  | 2.439667  | -0.617691 |
| H | 1.419586  | 0.368726  | 1.389880  |
| H | 3.770900  | -2.355247 | -0.938152 |

S2-TS1

|                              |                             |
|------------------------------|-----------------------------|
| B3LYP electronic energy:     | -1013.86025271 a.u.         |
| B3LYP enthalpy:              | -1013.505305 a.u.           |
| B3LYP free energy:           | -1013.574659 a.u.           |
| M06 SCF energy in solution:  | -1015.15771146 a.u.         |
| M06 enthalpy in solution:    | -1014.802764 a.u.           |
| M06 free energy in solution: | -1014.872118 a.u.           |
| Imaginary frequency:         | -1276.7079 cm <sup>-1</sup> |

Cartesian coordinates

| ATOM | X         | Y         | Z         |
|------|-----------|-----------|-----------|
| H    | -5.910033 | -0.800905 | -0.136731 |
| H    | -5.119539 | 1.560969  | -0.520859 |
| H    | -2.676027 | 2.009975  | -0.508671 |
| Ni   | -0.159292 | 0.241976  | -0.159208 |
| C    | 4.487921  | -1.053741 | -0.431441 |
| C    | 3.409356  | -1.835828 | -0.013758 |
| C    | 2.125452  | -1.298907 | 0.051782  |
| C    | 1.893768  | 0.058854  | -0.275688 |
| C    | 2.981291  | 0.817122  | -0.734045 |
| C    | 4.267545  | 0.267834  | -0.811859 |
| H    | 5.486807  | -1.479440 | -0.479395 |
| H    | 2.843936  | 1.854211  | -1.026358 |
| H    | 5.091416  | 0.882730  | -1.165248 |
| C    | 0.962748  | -2.218730 | 0.323167  |
| O    | 1.084546  | -3.374781 | 0.740747  |
| N    | -0.197027 | -1.607288 | -0.007233 |
| C    | -1.456012 | -2.260605 | 0.221599  |
| C    | -2.540916 | -1.231132 | 0.040801  |
| C    | -3.900645 | -1.556001 | 0.053259  |
| C    | -4.850708 | -0.560723 | -0.141998 |
| C    | -4.418021 | 0.750693  | -0.352935 |
| C    | -3.054342 | 1.006629  | -0.347236 |
| N    | -2.128394 | 0.047779  | -0.149271 |
| H    | -4.194934 | -2.589147 | 0.210867  |
| H    | -1.630767 | -3.097917 | -0.474260 |
| H    | -1.518527 | -2.700528 | 1.231545  |
| C    | 0.025771  | 2.325701  | 0.002524  |
| C    | 0.945140  | 3.112789  | 0.960551  |
| C    | -0.034079 | 2.938678  | -1.399057 |
| H    | -0.291070 | 4.008652  | -1.354606 |
| H    | 0.929020  | 2.862058  | -1.917251 |
| H    | -0.777207 | 2.444885  | -2.036369 |
| H    | 3.527142  | -2.884973 | 0.243577  |
| H    | 1.057013  | 1.138134  | 0.016318  |
| H    | 1.974461  | 3.144331  | 0.579701  |
| H    | -0.963801 | 2.350032  | 0.472099  |
| H    | 0.601995  | 4.159807  | 0.971351  |
| C    | 0.951703  | 2.569039  | 2.392848  |

|   |           |          |          |
|---|-----------|----------|----------|
| H | -0.060474 | 2.560062 | 2.816815 |
| H | 1.335089  | 1.542781 | 2.427826 |
| H | 1.581425  | 3.183738 | 3.045943 |

S3-TS1

|                              |                             |
|------------------------------|-----------------------------|
| B3LYP electronic energy:     | -1892.85990968 a.u.         |
| B3LYP enthalpy:              | -1892.334593 a.u.           |
| B3LYP free energy:           | -1892.431418 a.u.           |
| M06 SCF energy in solution:  | -1893.89030460 a.u.         |
| M06 enthalpy in solution:    | -1893.364988 a.u.           |
| M06 free energy in solution: | -1893.461813 a.u.           |
| Imaginary frequency:         | -2066.3011 cm <sup>-1</sup> |

Cartesian coordinates

| ATOM | X         | Y         | Z         |
|------|-----------|-----------|-----------|
| H    | -1.903996 | -5.845354 | 1.044487  |
| H    | 0.130052  | -4.631583 | 1.909167  |
| H    | 0.481315  | -2.277042 | 1.250274  |
| Ni   | -1.091316 | -0.288953 | -0.580536 |
| C    | -3.632082 | 3.883252  | 0.567545  |
| C    | -4.157858 | 2.665559  | 0.137015  |
| C    | -3.294313 | 1.641904  | -0.259816 |
| C    | -1.893988 | 1.802043  | -0.251124 |
| C    | -1.389879 | 3.042224  | 0.173084  |
| C    | -2.246640 | 4.070245  | 0.583282  |
| H    | -4.295538 | 4.685621  | 0.881631  |
| H    | -0.320034 | 3.232232  | 0.171905  |
| H    | -1.831612 | 5.020563  | 0.914189  |
| C    | -3.858982 | 0.328340  | -0.694412 |
| O    | -5.071558 | 0.087601  | -0.767550 |
| N    | -2.884325 | -0.568529 | -1.004481 |
| C    | -3.235837 | -1.946903 | -1.238218 |
| C    | -2.333936 | -2.787142 | -0.379447 |
| C    | -2.592273 | -4.117926 | -0.050730 |
| C    | -1.710665 | -4.811672 | 0.772576  |
| C    | -0.583291 | -4.144434 | 1.252791  |
| C    | -0.377940 | -2.821984 | 0.883290  |
| N    | -1.222207 | -2.146768 | 0.074235  |
| H    | -3.491603 | -4.588936 | -0.435138 |
| H    | -5.228712 | 2.484049  | 0.101541  |
| H    | -4.292867 | -2.113556 | -0.997042 |
| H    | -3.095376 | -2.232133 | -2.296287 |
| H    | -1.180657 | 1.161000  | -1.382691 |
| H    | -0.711678 | 0.535048  | -2.170016 |
| P    | 1.123216  | 0.155248  | -0.105188 |
| C    | 1.473210  | -0.010246 | 1.703674  |
| C    | 2.584118  | -0.677274 | 2.243043  |
| C    | 0.526372  | 0.553453  | 2.579022  |
| C    | 2.749125  | -0.770157 | 3.627632  |
| H    | 3.319688  | -1.132650 | 1.588112  |
| C    | 0.703010  | 0.470074  | 3.960131  |
| H    | -0.349885 | 1.052758  | 2.172978  |
| C    | 1.813320  | -0.193973 | 4.487876  |
| H    | 3.612101  | -1.293339 | 4.031101  |
| H    | -0.033997 | 0.915243  | 4.622802  |
| H    | 1.944821  | -0.266704 | 5.564099  |
| C    | 2.314157  | -0.964829 | -0.964046 |
| C    | 1.830379  | -2.058165 | -1.696556 |
| C    | 3.698192  | -0.717590 | -0.946920 |
| C    | 2.712385  | -2.905593 | -2.370778 |
| H    | 0.760718  | -2.228096 | -1.759790 |
| C    | 4.577560  | -1.566741 | -1.618482 |

|   |          |           |           |
|---|----------|-----------|-----------|
| H | 4.088074 | 0.151172  | -0.424111 |
| C | 4.086080 | -2.665672 | -2.327934 |
| H | 2.322365 | -3.746006 | -2.938544 |
| H | 5.644849 | -1.363342 | -1.597536 |
| H | 4.771411 | -3.322539 | -2.856864 |
| C | 1.795536 | 1.818578  | -0.536260 |
| C | 2.442027 | 2.628460  | 0.409482  |
| C | 1.682847 | 2.272481  | -1.861792 |
| C | 2.962654 | 3.870494  | 0.037342  |
| H | 2.537069 | 2.298835  | 1.438522  |
| C | 2.205697 | 3.512318  | -2.226828 |
| H | 1.167177 | 1.662892  | -2.597201 |
| C | 2.846104 | 4.315142  | -1.279734 |
| H | 3.457621 | 4.488565  | 0.781683  |
| H | 2.105646 | 3.853429  | -3.253571 |
| H | 3.249304 | 5.282504  | -1.566981 |

S4\_TS1  
 B3LYP electronic energy: -2929.22012527 a.u.  
 B3LYP enthalpy: -2928.395962 a.u.  
 B3LYP free energy: -2928.539055 a.u.  
 M06 SCF energy in solution: -2929.90771640 a.u.  
 M06 enthalpy in solution: -2929.083553 a.u.  
 M06 free energy in solution: -2929.226646 a.u.  
 Imaginary frequency: -380.4939 cm<sup>-1</sup>

Cartesian coordinates

| ATOM | X         | Y         | Z         |
|------|-----------|-----------|-----------|
| H    | -7.029226 | -1.965467 | 0.362201  |
| H    | -6.679458 | -2.356733 | 2.824860  |
| H    | -4.410081 | -3.035538 | 3.606856  |
| C    | -2.156270 | 1.359132  | -4.861073 |
| C    | -2.600521 | 0.244150  | -4.162680 |
| C    | -1.904856 | -0.241311 | -3.040011 |
| C    | -0.725052 | 0.401986  | -2.589305 |
| C    | -0.277844 | 1.507693  | -3.345465 |
| C    | -0.980903 | 1.993006  | -4.445795 |
| H    | -2.706818 | 1.723398  | -5.724424 |
| H    | -0.607875 | 2.861889  | -4.984498 |
| C    | -2.510268 | -1.462490 | -2.409253 |
| O    | -3.380644 | -2.130857 | -2.979937 |
| N    | -2.074789 | -1.806371 | -1.157676 |
| C    | -2.533484 | -3.014508 | -0.483868 |
| C    | -3.737609 | -2.808266 | 0.421009  |
| C    | -4.977376 | -2.426419 | -0.115655 |
| C    | -6.055474 | -2.257036 | 0.747722  |
| C    | -5.866431 | -2.475205 | 2.114412  |
| C    | -4.598514 | -2.855273 | 2.549292  |
| N    | -3.549248 | -3.021391 | 1.731948  |
| H    | -5.067493 | -2.279849 | -1.187508 |
| H    | -3.494296 | -0.289891 | -4.468983 |
| H    | -2.783378 | -3.736783 | -1.267451 |
| H    | -1.717297 | -3.414733 | 0.123806  |
| Ni   | 0.333534  | 0.054203  | -1.002192 |
| P    | 2.183310  | -0.976131 | -0.174571 |
| P    | -0.488301 | 1.613341  | 0.472158  |
| H    | -1.397888 | -1.201882 | -0.696596 |
| H    | 0.550009  | -0.706378 | -2.257718 |
| C    | 2.387294  | -2.736210 | -0.718923 |
| C    | 3.601911  | -3.422543 | -0.552299 |

|   |           |           |           |
|---|-----------|-----------|-----------|
| C | 1.308666  | -3.403506 | -1.315376 |
| C | 3.730850  | -4.746255 | -0.969914 |
| H | 4.451864  | -2.919864 | -0.100235 |
| C | 1.437134  | -4.732704 | -1.728554 |
| H | 0.373225  | -2.875807 | -1.473847 |
| C | 2.646806  | -5.405244 | -1.557504 |
| H | 4.678343  | -5.262893 | -0.840637 |
| H | 0.591600  | -5.235082 | -2.190450 |
| H | 2.749190  | -6.436693 | -1.884322 |
| C | 3.692322  | -0.163783 | -0.882705 |
| C | 3.587293  | 0.386352  | -2.171863 |
| C | 4.928626  | -0.098516 | -0.221522 |
| C | 4.690670  | 0.982828  | -2.783605 |
| H | 2.635744  | 0.342216  | -2.694326 |
| C | 6.029976  | 0.504243  | -0.833332 |
| H | 5.034121  | -0.507919 | 0.778172  |
| C | 5.914909  | 1.045773  | -2.114764 |
| H | 4.591216  | 1.399525  | -3.782476 |
| H | 6.979327  | 0.548358  | -0.305726 |
| H | 6.773630  | 1.513666  | -2.588913 |
| C | 2.545387  | -1.080029 | 1.640444  |
| C | 2.364947  | -2.272196 | 2.359954  |
| C | 2.882851  | 0.086312  | 2.350438  |
| C | 2.529579  | -2.299956 | 3.747310  |
| H | 2.099426  | -3.186394 | 1.839187  |
| C | 3.056285  | 0.053510  | 3.733816  |
| H | 3.013595  | 1.025658  | 1.822469  |
| C | 2.879829  | -1.139799 | 4.438248  |
| H | 2.388042  | -3.234300 | 4.284366  |
| H | 3.322587  | 0.966097  | 4.260272  |
| H | 3.010885  | -1.163151 | 5.516767  |
| C | -1.286558 | 1.030109  | 2.032335  |
| C | -2.211074 | 1.813144  | 2.745489  |
| C | -0.953687 | -0.239517 | 2.524515  |
| C | -2.772002 | 1.338788  | 3.931210  |
| H | -2.498543 | 2.789722  | 2.367723  |
| C | -1.516917 | -0.714262 | 3.710313  |
| H | -0.250262 | -0.859076 | 1.978584  |
| C | -2.424090 | 0.075291  | 4.416856  |
| H | -3.486201 | 1.953850  | 4.472600  |
| H | -1.253063 | -1.704488 | 4.068917  |
| H | -2.867043 | -0.293821 | 5.338238  |
| C | -1.775207 | 2.753992  | -0.207806 |
| C | -1.598298 | 4.139960  | -0.314323 |
| C | -2.978479 | 2.187102  | -0.661265 |
| C | -2.603515 | 4.942800  | -0.861234 |
| H | -0.678179 | 4.600619  | 0.030133  |
| C | -3.981380 | 2.990348  | -1.200248 |
| H | -3.132724 | 1.114154  | -0.595956 |
| C | -3.795953 | 4.371511  | -1.304000 |
| H | -2.450264 | 6.016268  | -0.937431 |
| H | -4.904130 | 2.534809  | -1.548829 |
| H | -4.576094 | 4.996287  | -1.730813 |
| C | 0.837922  | 2.773475  | 1.041580  |
| C | 1.844741  | 3.111442  | 0.121421  |
| C | 0.899739  | 3.312633  | 2.335011  |
| C | 2.882144  | 3.973095  | 0.481111  |
| H | 1.824357  | 2.688120  | -0.878999 |
| C | 1.942320  | 4.169029  | 2.697067  |
| H | 0.139690  | 3.057323  | 3.066274  |
| C | 2.934585  | 4.502275  | 1.772813  |
| H | 3.652982  | 4.219264  | -0.244044 |
| H | 1.977582  | 4.575420  | 3.704667  |
| H | 3.745513  | 5.167191  | 2.058016  |



H 0.646575 2.008540 -3.062903

S4-TS2

B3LYP electronic energy: -1012.60588878 a.u.  
B3LYP enthalpy: -1012.274552 a.u.  
B3LYP free energy: -1012.345258 a.u.  
M06 SCF energy in solution: -1013.90432039 a.u.  
M06 enthalpy in solution: -1013.572984 a.u.  
M06 free energy in solution: -1013.643690 a.u.  
Imaginary frequency: -49.0271 cm<sup>-1</sup>

Cartesian coordinates

| ATOM | X         | Y         | Z         |
|------|-----------|-----------|-----------|
| H    | 2.778405  | -1.093007 | 3.099583  |
| H    | 5.217009  | -1.065015 | 2.545151  |
| H    | 5.887865  | -1.019623 | 0.120364  |
| Ni   | -0.782728 | 1.119717  | -0.199677 |
| C    | -4.431163 | -1.820798 | 0.598494  |
| C    | -3.303313 | -2.162700 | -0.137449 |
| C    | -2.256748 | -1.234000 | -0.250120 |
| C    | -2.306475 | 0.061163  | 0.311659  |
| C    | -3.469864 | 0.373745  | 1.039212  |
| C    | -4.502914 | -0.553696 | 1.194028  |
| H    | -5.249143 | -2.527280 | 0.712075  |
| H    | -3.577474 | 1.356159  | 1.491484  |
| H    | -5.383398 | -0.284851 | 1.774411  |
| C    | -1.025730 | -1.589185 | -0.971475 |
| O    | -0.885098 | -2.448297 | -1.820955 |
| N    | 0.088449  | -0.745813 | -0.547647 |
| C    | 1.376460  | -1.088373 | -1.170850 |
| C    | 2.502927  | -1.046269 | -0.156121 |
| C    | 3.114541  | -1.075944 | 2.065015  |
| C    | 4.472601  | -1.060058 | 1.755277  |
| C    | 4.840218  | -1.034218 | 0.408281  |
| H    | 1.293811  | -2.098522 | -1.592605 |
| H    | 1.583801  | -0.416596 | -2.006442 |
| C    | 0.742495  | 2.354646  | -0.792261 |
| C    | 0.017475  | 3.012378  | -0.018913 |
| H    | -1.776281 | 2.135971  | 0.086599  |
| C    | 1.909707  | 2.219518  | -1.691802 |
| H    | 1.630844  | 1.782121  | -2.657204 |
| H    | 2.353904  | 3.203581  | -1.887092 |
| H    | 2.685883  | 1.585888  | -1.248988 |
| C    | -0.444741 | 4.164352  | 0.781703  |
| H    | -0.635286 | 3.878504  | 1.821165  |
| H    | 0.320071  | 4.951283  | 0.773986  |
| H    | -1.374678 | 4.577947  | 0.375876  |
| H    | -3.211030 | -3.133088 | -0.617930 |
| H    | 0.214665  | -0.853377 | 0.470100  |
| N    | 2.150503  | -1.070989 | 1.135218  |
| C    | 3.843295  | -1.024290 | -0.563649 |
| H    | 4.092917  | -1.005817 | -1.621097 |

S4-TS3

B3LYP electronic energy: -1012.57477425 a.u.  
B3LYP enthalpy: -1012.245256 a.u.  
B3LYP free energy: -1012.313534 a.u.  
M06 SCF energy in solution: -1013.86880593 a.u.  
M06 enthalpy in solution: -1013.539288 a.u.  
M06 free energy in solution: -1013.607566 a.u.

Imaginary frequency: -658.6480 cm-1

Cartesian coordinates

| ATOM | X         | Y         | Z         |
|------|-----------|-----------|-----------|
| H    | -5.425811 | -1.498326 | -0.913648 |
| H    | -4.796643 | 0.678660  | -2.011203 |
| H    | -2.460491 | 1.518439  | -1.721271 |
| Ni   | 0.076806  | 0.463235  | -0.402705 |
| C    | 4.688028  | -0.380484 | -0.505685 |
| C    | 3.760449  | -1.285027 | 0.009151  |
| C    | 2.411309  | -0.922484 | 0.077788  |
| C    | 1.960136  | 0.336990  | -0.377254 |
| C    | 2.906064  | 1.230703  | -0.891976 |
| C    | 4.258317  | 0.870623  | -0.959587 |
| H    | 5.740146  | -0.647331 | -0.558922 |
| H    | 2.600880  | 2.212519  | -1.246932 |
| H    | 4.981642  | 1.574183  | -1.366230 |
| C    | 1.376032  | -1.893046 | 0.535864  |
| O    | 1.514008  | -3.105879 | 0.605905  |
| N    | 0.156591  | -1.233944 | 0.783459  |
| C    | -1.083363 | -1.987182 | 0.804234  |
| C    | -2.162823 | -1.259933 | 0.014479  |
| C    | -3.455999 | -1.781590 | -0.087844 |
| C    | -4.420190 | -1.098166 | -0.821568 |
| C    | -4.076210 | 0.108706  | -1.434290 |
| C    | -2.778233 | 0.577634  | -1.282778 |
| N    | -1.838399 | -0.087555 | -0.583692 |
| H    | -3.691780 | -2.720046 | 0.405175  |
| H    | -0.904597 | -2.982193 | 0.377849  |
| H    | -1.443769 | -2.149955 | 1.830615  |
| C    | -0.292629 | 1.367316  | 1.593926  |
| C    | 0.165077  | 2.397281  | 0.771243  |
| H    | 1.240550  | 2.467692  | 0.614822  |
| C    | -1.692535 | 1.489081  | 2.159735  |
| H    | -2.403845 | 2.127289  | 1.610323  |
| H    | -2.170484 | 0.514597  | 2.323753  |
| H    | -1.584911 | 1.934947  | 3.161530  |
| C    | -0.579881 | 3.665784  | 0.378140  |
| H    | -0.134795 | 4.120541  | -0.515101 |
| H    | -1.641955 | 3.490831  | 0.170806  |
| H    | -0.531497 | 4.420312  | 1.177789  |
| H    | 4.059276  | -2.274339 | 0.345126  |
| H    | 0.176817  | -0.278109 | 1.444201  |

S5-TS1

B3LYP electronic energy: -1012.61990838 a.u.  
B3LYP enthalpy: -1012.289640 a.u.  
B3LYP free energy: -1012.359332 a.u.  
M06 SCF energy in solution: -1013.91305402 a.u.  
M06 enthalpy in solution: -1013.582786 a.u.  
M06 free energy in solution: -1013.652478 a.u.  
Imaginary frequency: -1640.7856 cm-1

Cartesian coordinates

| ATOM | X         | Y         | Z         |
|------|-----------|-----------|-----------|
| H    | 5.615918  | -1.316192 | 0.425135  |
| H    | 4.967641  | 1.050811  | 0.981946  |
| H    | 2.568524  | 1.732038  | 0.666550  |
| Ni   | 0.056924  | 0.251845  | -0.197513 |
| C    | -4.535990 | -0.584901 | 0.411566  |
| C    | -3.546919 | -1.560856 | 0.555667  |
| C    | -2.264313 | -1.268605 | 0.100052  |

|   |           |           |           |
|---|-----------|-----------|-----------|
| C | -1.929901 | -0.018710 | -0.465574 |
| C | -2.938459 | 0.939055  | -0.618074 |
| C | -4.235781 | 0.648927  | -0.182284 |
| H | -5.549347 | -0.786797 | 0.749099  |
| H | -2.709614 | 1.911866  | -1.043741 |
| H | -5.021661 | 1.391898  | -0.296104 |
| C | -1.116639 | -2.242607 | 0.076512  |
| O | -1.083903 | -3.345848 | 0.605650  |
| N | -0.105606 | -1.661085 | -0.677058 |
| C | 1.187047  | -2.293397 | -0.819062 |
| C | 2.294693  | -1.399672 | -0.288435 |
| C | 3.610143  | -1.849583 | -0.155545 |
| C | 4.590391  | -0.977232 | 0.308938  |
| C | 4.235113  | 0.336053  | 0.622065  |
| C | 2.910652  | 0.723433  | 0.463759  |
| N | 1.959236  | -0.123498 | 0.025759  |
| H | 3.851022  | -2.876795 | -0.412115 |
| H | 1.166661  | -3.248722 | -0.277485 |
| H | 1.401285  | -2.525435 | -1.873301 |
| C | 0.015683  | 2.105732  | 0.224167  |
| C | 0.397926  | 3.019222  | -0.684907 |
| H | 0.706989  | 2.665537  | -1.672894 |
| C | -0.451198 | 2.421634  | 1.627190  |
| H | -0.404495 | 3.489703  | 1.879324  |
| H | -1.488032 | 2.091618  | 1.771339  |
| H | 0.147889  | 1.882788  | 2.375377  |
| C | 0.453990  | 4.525532  | -0.544575 |
| H | -0.210968 | 5.013058  | -1.271900 |
| H | 0.163376  | 4.872516  | 0.451115  |
| H | 1.465663  | 4.905593  | -0.747828 |
| H | -3.759769 | -2.530521 | 0.996654  |
| H | -0.867753 | -0.659887 | -1.245675 |
